# Supplementary material for: Evolution of the Family Equidae, Subfamily Equinae, in North, Central and South America, Eurasia and Africa during the Plio-Pleistocene
Source: Biology (Basel). 2022 Aug 24;11(9):1258. doi: 10.3390/biology11091258 (PMC9495906; doi:10.3390/biology11091258)
Supplement: Supplementary file 1 [file biology-11-01258-s001.zip]

Archive with 7 entries (7 files):
- Equinae ms_Supplementary Text.pdf
- Supplementary Table S1_taxonomy.xlsx
- Supplementary Table S2_body mass and diet.xlsx
- Supplementary Table S3_Equini paleoecology_summary table.xlsx
- Supplementary Table S4. Taxa coded on the MeanHYP maps.xlsx
- Supplementary Table S5. Mean Hyposodonty data.xlsx
- Supplementary Table S6_North and Central American Equus sensu lato.xlsx
