# Supplementary material for: Evolution of the Family Equidae, Subfamily Equinae, in North, Central and South America, Eurasia and Africa during the Plio-Pleistocene
Source: Biology (Basel). 2022 Aug 24;11(9):1258. doi: 10.3390/biology11091258 (PMC9495906; doi:10.3390/biology11091258)
Supplement: Supplementary file 1 [file biology-11-01258-s001.zip › Supplementary Table S1_taxonomy.xlsx]

## Sheet: North America
genus	species	age (NALMA/Epoch)	approx. age (Ma)	Distribution
Equus	calobatus	late Blancan - early Rancholabrean	2.5 Ma - 9.5 ka	Canada (Alberta); Mexico (Aguascalientes); USA (Colorado; Kansas, Nebraska, New Mexico, Oklahoma, Texas)
Equus	cedralensis	Rancholabrean	0.15 Ma - 9.5 ka	Mexico (Aguascalientes, Chihuahua, Estado de Mexico, Michoacán, Puebla, San Luis Potosí)
Equus	conversidens	Irvingtonian - Rancholabrean	1.9 Ma - 9.5 ka	Canada (Alberta); Mexico (Aguascalientes, Chapala, Chiapas, Hidadlgo, Jalisco, Michoacán, Nuevo Leon, Puebla, Oaxaca, San Luis Potosi, Sonora, Estado de Mexico, Tlaxcala, Yukatan, Zacatecas); USA (Arizona, California, Florida, Kansas, Nebraska, New Mexico, Oklahoma, Texas, Wyoming)
Equus	cumminsi	Blancan - early Irvingtonian	4.9 Ma - 0.85 Ma	USA (Kansas, Texas)
Equus	enormis	early Pliocene - middle Pleistocene	4.9 Ma	USA (California)
Equus	lambei	Irvingtonian – Rancholabrean	1.9 Ma - 9.5 ka	Canada (Alberta, Yukon); USA (Alaska, California, Iowa, Kansas, Nebraska, New Mexico, Texas, Wyoming)
Equus/ Haringtonhippus	francisci	Irvingtonian - Rancholabrean	1.9 Ma - 9.5 ka	Canada (Yukon); Mexico (Aguascalientes, Estado de Mexico, Jalisco, Puebla, Sonora, Zacatecas); USA (Alaska, Arizona, Florida, Kansas, Nebraska, New Mexico, Texas, Wyoming)
Equus	fraternus	Irvingtonian - Rancholabrean	1.9 Ma - 9.5 ka	Canada (Alberta); USA (Florida, Illinois, Mississipi, Nebraska, Pennsylvania, South Carolina, Texas)
Equus/Plesippus	idahoensis	Blancan - early Irvingtonian	4.9 Ma - 9.5 ka	USA (Arizona, California, Idaho, Nevada)
Equus	mexicanus	Rancholabrean	0.15 Ma - 9.5 ka	Mexico (Aguascalientes, Chiapas, Estado de Mexico, Jalisco, Michoacán, Oaxaca, Puebla, San Luis Potosi, Zacatecas, Zumpago, ); USA (California, Oregon, Texas)
Equus	occidentalis	Rancholabrean	0.15 Ma - 9.5 ka	Mexico (Baja California, Sonora); USA (Arizona, California, Nevada, New Mexico, Oregon)
Equus	pseudaltidens	?Irvingtonian - Rancholabrean (Sangamon Interglacial)	1.9 Ma - 9.5 ka	USA (Texas, ?Florida)
Equus	scotti	late Blancan - Rancholabrean	2.5 Ma - 9.5 ka	Canada (Alberta, Ontario, Saskatchewan, Yukon); USA (California, Florida, Idaho, Kansas, Nebraska, New Mexico, Oklahoma, Texas)
Equus/Plesippus	simplicidens	Blancan - Irvingtonian	4.9 Ma - 0.15 Ma	Mexico (Baja California); USA (Arizona, California, Idaho, Kansas, Nebraska, Texas)
Equus	stenonis anguinus	late Blancan	2.5 - 1.72 Ma	USA (Arizona, Idaho)
Equus	verae	Middle Pleistocene -Rancholabrean	- 9.5 ka	Canada (Yukon)
Astrohippus	ansae	Hemphillian-Blancan		Zacatecas (Mexico), New Mexico, Oklahoma, Texas (USA)
Astrohippus	stockii	Hemphillian-Blancan		Chihuahua, Guanajuato, Jalisco, Mexico; New Mexico, Florida, Texas (USA)
Boreohippidion	galushai	Late Hemphillian		Arizona (USA)
Calippus	elaschistus	Miocene-late Hemphillian		Florida (USA)
Calippus	hondurensis	Miocene-Blancan		Puntarenas (Costa Rica); Guanajuato, Hidalgo, Jalisco, Zacatecas (Mexico); Honduras; Florida (USA);
Dinohippus	interpolatus	Hemphilian-Blancan		Hidalgo, Zacatecas (Mexico), California, Kansas, New Mexico, Texas,
Dinohippus	leardi	miocene-hemphilian		California (USA)
Dinohippus	leydianus	Hemphillian- Blancan		Alberta (Canada); Arizona, California, Kansas, Nebraska, Oklahoma (USA)
Dinohippus	mexicanus	Hemphillian - Blancan		Chihuahua, Guanajuato, Jalisco, Hidalgo, Nayarit (Mexico); California, Florida, New Mexico, Texas, (USA)
Dinohippus	spectans	Miocene-late Hemphillian		California, Idaho, Nevada, Oregon, Texas (USA)
Pliohippus	coalingensis	Pliocene		California (USA)
Cormohipparium	emsliei	Latest Hemphillian - Blancan		Alabama, Florida, Louisiana (USA)
Cormohipparium	occidentale	Hemphillian-Blancan		California, Florida, Nebraska, New Mexico, Oklahma (USA)
Nannippus	aztecus	Hemphillian-Blancan		Chihuahua, Guanajuato, Jalisco (Mexico); Alabama, Florida, Louisiana, Mississipi, Oklahoma, Texas (USA)
Nannippus	beckensis	Blancan		Texas (USA)
Nannippus	lenticularis	Hemphillian-Blancan		Alberta (Canada); Alabama, Kansas, Nebraska, Oklahoma, Texas (USA)
Nannippus	peninsulatus	Hemphillian-Blancan		Guanajuato, Hidalgo, Jalisco, Michoacan(Mexico); Arizona, Florida, Kansas, Nebraska, New Mexico, Texas (USA)
Neohipparion	eurystyle	Hemphillian-Blancan		Alberta (Canada); Hidalgo, Zacatecas (Mexico); Alabama, California, Florida, Kansas, Nebraska, Oklahoma, Texas
Neohipparion	gidley	late Hemphiliam		California, Oklahoma (USA)
Neohipparium	leptode	Hemphillian - Blancan		California, Kansas, Nebraska, Nevada, Oklahoma, Oregon (USA)
Pseudohipparion	simpsoni	Latest Hemphillian		Florida, Kansas, Oklahoma, Texas (USA)
Hipparionini genus and species indet.		Early Pliocene (4 - 3.5 Ma)		Ellesmere Island, Canada

## Sheet: South America
Genus	Species	age (Ma)	geographic distribution
Equus	neogeus	Late Pleistocene	Argentina, Bolivia, Brazil, Chile, Colombia, Ecuador, Peru, Uruguay, Venezuela
Hippidion	devillei	Middle - Late Pleistocene	Argentina (Uquia, Buenos Aires); Bolivia (Tarija); Perù (Andes)
Hippidion	saldiasi	late Pleistocene	Argentina (Patagonia, Cerro Bombero); Chile (Patagoia, Atacama desert, Lago Sofia)
Hippidion	principale	Lujanian	Argentina, Bolivia, Brazil and Uruguay

## Sheet: Eastern Eurasia
Genus	Species	Age (Ma)	Distribution
Cremohipparion	licenti	MN15	China (Yushe Basin)
Baryhipparion	insperatum	MN16-MN17	China (Yushe Basin, Inner Mongolia)
Proboscidipparion	pater	MN14-M15	China (Yushe Basin)
Proboscidipparion	sinense	MN17-MQ1	China (Henan Province)
Plesiohipparion	houfenense	MN14-MN15	Mongolia (Khunuk Formation, Kholobolchi Nor); China (Yushe Basin)
Plesiohipparion	huangheense	MN15	China (Yushe Basin); India (Tatrot); Turkey (Guliyazi)
Plesiohipparion	shanxieense	MN17	China (Hsi Chwang, Shanxi)
Equus	eisenmannae	2.55 - 1.86	China (Longdan, Dongxiang County, Gansu)
Equus	sanmeniensis	2.5 - 0.8	North and Northwestern China, Siberia and probably Tajikistan
Equus	huanghoensis	2.5 - 1.6	China (Nihewan, Hebei; Linyi, Shanxi; Sanmenxia, Pinglu, Shanxi; Xunyi, Shaanxi; Nanjing, Jiangsu)
Equus	yunnanensis	2.5 - 0.01	China (Yuanmou, Yunnan; Liucheng, Guangxi; Jianshi and Enshi, Hubei; Hanzhong, Shaanxi; Huili, Sichuan); Myanmar (Irawaddy)
Equus	teilhardi	2.0 - 1.0	North and Northwestern China; Qixian, Shanxi;
Equus	qingyangensis	2.1 - 1.2	Northwestern and northern China
Equus	wangi	2.0 - 1.0	China (Qingyang, Gansu)
Equus	pamirensis	2.2 - 2.0	Tajikistan (Kuruksai)
Equus	nalaikensis	1.1 - 0.7.0	Mongolia (Nalajkha)
Equus	colimensis	1.0	Russia (Bolshaja Chukochya, Kolyma lowland, northeast Yakutia, Siberia)
Equus	lenensis	0.7 - 0.1	Russia (Bolshaja Chukochya, Kolyma lowland, northeast Yakutia, Siberia)
Equus	beijingensis	late Middle Pleistocene	China (Loc. 21 Zhoukoudian)
Equus	valeriani	late Middle - Late Pleistocene	Uzbekistan (Samarkand)
Equus	dalianensis	Late Pleistocene	China (Zhaogong, Haerbin, Heilongjiang province)
Equus	ovodovi	0.04 - 0.01	China (Zhaogong, Haerbin, Heilongjiang province)
Equus	hemionus	0.0	China, Mongolia
Equus	kiang	0.0	China, Nepal
Equus	przewalskii	0.0	China (Tonghe, Heilongjiang province; Mongolia)

## Sheet: Indian Subcontinent
Genus	Species	Age MN	Age (Ma)	Distribution
Plesiohipparion	huangheense	MN 15-16	3.6-2.6	Siwalik Hills
Eurygnathihippus	sp.	MN 15-16	3.6-2.6	Siwalik Hills
"Hippotherium"	antelopinum	MN 15-16	3.6-2.6	Siwalik Hills
Equus	sivalensis	MN 17-MQ 3B	2.6-0.6	Siwalik Hills
Equus	sp. (small)	MN 17-MQ 2	~2.2-~1.2	Siwalik Hills
Equus	namadicus	MQ 4	~0.2-0.015	Peninsular India
Equus	hemionus	MQ 4	0.03-0.0	Peninsular India

## Sheet: Western Eurasia
Genus	Species	Age MN	Age (Ma)	Distribution
?Cremohipparion	fissurae	MN15	3.91	Spain (Layna, La Calera, La Gloria 4, Orrios 3)
Proboscidipparion	heintzi	MN15	ca. 4.0	Turkey (Calta)
Proboscidipparion	crassum	MN14-MN16	ca. 4.0 - 2.7 Ma	Spain (La Soler); France ( Perpignan, Montpellier); Greece (Ptolemais); Bulgaria (Dorkovo); England (Red Crag)
Plesiohipparion	longipes	MN15	ca. 4.0	Turkey (Calta); Greece (Megalon Emvolon)
Plesiohipparion	rocinantis	MN16-MN17	3.0 - 2.2	Spain (Villarroya); France (Roca-Neyra); possibly Georgia (Kvabebi)
Hipparion	sp.	MN16b	2.6	Italy (Montopoli)
Equus	livenzovensis	MN16b	2.6 - 2.0	Russia (Liventsovka); France (Roca-Neyra); Italy (Montopoli); Spain (El Rincon, Huelago). Possibly Romania (Grăunceau) and Spain (Fonelas).
Equus	stenonis	MN17-18	2.45 - 1.6	France (Saint Vallier, Chilhac); Spain (La Puebla de Valverde); Italy (Pantalla, Upper Valdarno Basin); Greece (Sesklo, Dafnerò, Vatera, Volax, Gerakarou); Turkey (Gulyazi); Georgia (Dmanisi). Possibly Italy (Farneta, Pirro Nord); France (Ceyssaguet).
Equus	major	MN16-17	2.6 - 2.0	France (Chagny, Pardines, Le Coupet, Senèze, Blassac la Gironde); The Netherlands (Telegen); Germany (Schernfeld); England (East Runton, Norfolk); Russia (Liventsovka); Romania (Malusteni, Oasele).
Equus	senezensis	MN18	2.2 - 2.0	France (Senèze), Italy (Coste San Giacomo). Possibly Italy (Montecarlo, Upper Valdarno Basin)
Equus	stehlini	MN18	1.9 - 1.78	Italy (Upper Valdarno Basin, Frattaguida). Possibly Greece (Pyrgos).
Equus	altidens	MN18-20	1.8 - 0.7	Georgia (Dmanisi), Greece (Gerakarou, Libakos, Polylakkos); Italy (Farneta, Pirro Nord, Slivia, Ponte Galeria, Venosa Loreto); France (Seinzelles, Solihac); Spain (Venta Micena, Barranco Leon, Fuente Nueva 3, Vallparadis, Huescar 1, Cullar de Baza 1, Atapuerca Gran Dolina); Germany (Sussenborn); England (Pakefield). Possibly Italy (Notarchirico).
Equus	suessenbornensis	MN18-20	1.5 - 0.7	Georgia (Akhalkalaki); Moldavia (Tiraspol); Czech Republic (Stranska Skala); Italy (Slivia, Bucine, Monte Tenda, Venosa Loreto); France (Solihac, Ceyssaguet); Spain (Barranco Leon 1, Fuente Nueva3, Cueva Victoria, Huescar 1, Cullar de Baza 1); England (Cromer Forest); Germany (Sussenborn, Voigtstedt). Possibly Italy (Farneta, Pirro Nord).
Equus	apolloniensis	MN19-20	1.2 - 0.9	Greece (Apollonia, Platanochori-1). Possibly Greece (Tsiotra Vryssi), Turkey (Denzeli).
Equus	hipparionoides	MN20	1.0 - 0.78	Georgia (Akhalkalaki)
Equus	wuesti	early Middle Pleistocene	1.1 - 0.9	Germany (Untermassfeld)
Equus	marxi	early Middle Pleistocene	0.7	Germany (Sussenborn)
Equus	petralonensis	Middle Pleistocene	0.4 (Very approximate ages)	Greece (Petralona Cave)
Equus	graziosii	Middle Pleistocene	MIS 6	Italy (Maspino)
Equus	ferus	Middle Pleistocene	0.7 - 0.01	Europe
Equus	hydruntinus	Middle Pleistocene	0.6 - 0.0	Spain (Vallparadìs, Atapuerca Gran Dolina, Galeria); Italy (Vitinia, Grotta Romanelli, Tana delle Iene); France (Lunel Viel, d'Abbeville); Germany (Schoningen, Steinheim); England (Swanscombe)

## Sheet: Africa
Genus	Species	Age MN	Age (Ma)	Distribution
Cremohipparion	periafricanum	MN13-15	6.8-4.0	Spain (Valdecebro); Libya (Sahabi); Morocco (Tizi N'Tadderth)
Eurygnahohippus	feibeli	MN13-15	6.8-4.0	Libya (Sahabi); Kenya (Lothagam)
Sivalhippus	turkanensis	MN13-15	6.5-4.0	Kenya (Lothagam)
Eurygnahohippus	hooijeri	MN15	5	South Africa (Langebaanweg E Quarry)
Eurygnahohippus	woldegabrieli	MN15	4.4	Ethiopia (Aramis, Middle Awash)
Eurygnahohippus	afarensis	MN15	3.8-3.2	Ethiopia (Kada Hadar Member)
Eurygnahohippus	hasumense	MN15-16	3.8-3.2	Kenya (Kubi Algi Formation)
Eurygnahohippus	pomeli	MN17	2.6	Morocco (Ahl al Oughlam)
Eurygnahohippus	cornelianus	MN17-MQ1	1.8-1.0	Tanzania (Olduvai)
Equus	sp.		2.33 I current	Ethiopia
Equus	koobiforensis		2.1-?1.0	Kenya, Tanzania
Equus	oldowayensis		1.9-1.0	Kenya, Tanzania
Equus	capensis		2.0-?	South Africa
Equus	numidicus		2.44-1.2	Algeria (Ain Boucherit)
Equus	tabeti		2.44-1.2	Algeria (Ain Boucherit, Ain Hanech, El Kerba)
Equus	mauritanicus		1.0	Algeria (Tighenif)
Equus	melkiensis		Late Pleistocene	Algeria (Allobroges)
Equus	algericus		Late Pleistocene	Algeria (Allobroges)
Equus	grevyi		0.5 - recent	East Africa
Equus	quagga		?1.0 - recent	East and South Africa
Equus	zebra		?Middle Pleistocene - recent	South Africa, Namibia, Angola
Equus	africanus		1.2 - recent	East Africa
