# Supplementary material for: Evolution of the Family Equidae, Subfamily Equinae, in North, Central and South America, Eurasia and Africa during the Plio-Pleistocene
Source: Biology (Basel). 2022 Aug 24;11(9):1258. doi: 10.3390/biology11091258 (PMC9495906; doi:10.3390/biology11091258)
Supplement: Supplementary file 1 [file biology-11-01258-s001.zip › Supplementary Table S2_body mass and diet.xlsx]

## Sheet: All data
Genus	Species	Sp.	Museum collections and online data availability	Locality	Continent	Country	Basis for age estimate	Age (Ma) (mean of estimate)	n (BM)	Body mass (kg)	n (MW)	High	Low	Sharp	Round	Blunt	PERHIGH	PERLOW	PERSHARP	PERROUND	PERBLUNT	MW score (Saarinen et al., 2016)	Diet (inferred from Saarinen MW score)	Body size class	Reference (MW)	Locality NPP estimate	Reference for NPP estimate	Locality mean NAP%	Locality mean Graminae%	Pollen ref.	n (MICRO)	AP	AS	%Lp	%G	%XS	SWS	%0-17	Diet (inferred from MICROWEAR Strani)	Reference MICROWEAR
Equus	guagga	Equus quagga	United States National Museum of Natural History, Washington D.C.	modern Africa	Africa	not specified	present	0	20	288.356	10	0	10	1	3	6	0	100	10	30	60	2.75	grazer	small	Saarinen (new)						51	72	135.8	49		60	1.1		grazer	Rivals et al. 2015
Equus	grevyi	Equus grevyi	United States National Museum of Natural History, Washington D.C.	modern East Africa	Africa	not specified	present	0	36	360.795	9	0	9	2	2	5	0	100	22.2	22.2	55.6	2.66667	grazer	small	Saarinen (new)						15	49.1	163.1	63.6		66.7	1.33		grazer	Rivals et al. 2015
Equus	zebra	Equus zebra	United States National Museum of Natural History, Washington D.C.	modern South Africa	Africa	not specified	present	0	6	291.254	13	4	9	2	4	7	31.4	68.6	12.9	30.6	56.5	2.38462	grazer	small	Schulz and Kaiser 2013, Saarinen (new)
Equus	africanus	Equus africanus	United States National Museum of Natural History, Washington D.C.	modern East Africa	Africa	not specified	present	0	14	247.364	8	2	6	2	2	4	25	75	25	25	50	2.375	grazer	small	Schulz and Kaiser 2013, Saarinen (new)
Equus	hemionus	Equus hemionus	United States National Museum of Natural History, Washington D.C.	Central Asia	Asia	not specified	present	0	mean (Eisenmann 1979) + 2	199.876	5	0	5	2	0	3	0	100	20	0	80	2.6	grazer	small	Saarinen (new)	567.6	Saarinen (new), based on IUCN data	66.7381	21.0698	Andreev and Tarasov 2007 for Holocene Kazakhstan steppe sampled from Ozerki swamp
Equus	kiang	Equus kiang	United States National Museum of Natural History, Washington D.C.	Tibet	Asia	not specified	present	0	2	231.404	3	0	3	1	1	1	0	100	33.3	33.3	33.3	2.5	grazer	small	Saarinen (new)	335	Saarinen (new), based on IUCN data	100	27.25	Zhao and Herzschuh 2009, from modern Qaidam Basin surface samples
Equus	przewalski	Equus przewalski	United States National Museum of Natural History, Washington D.C.	Central Asia	Asia	not specified	present	0	mean (Eisenmann 1979)	312.894	15	9	6	1	2	12	58.1	41.9	9.3	11.6	79.1	2.26667	grazer	small	Schulz and Kaiser 2013, Saarinen (new)	347	Saarinen (new), based on IUCN data	92.3	21.44	Barbolini et al. 2020 for late Quaternary of Central Asia
Equus	ferus (lenensis)	Equus ferus (lenensis)	Zoological Museum of the Zoological Institute RAS, St. Petersburg	Yakutia	Asia	Russia	Late Pleistocene - Holocene		several (Kuzmina 1997)	363.418	9	2	7	2	4	3	22.2	77.8	22.2	44.4	33.3	2.33333	grazer	small	Pushkina and Saarinen (new)
Equus	ferus	Equus ferus	Natural History Museum, London (NHMUK)	Gough's Cave	Europe	UK	MIS2	0.022	4	374.11	9	1	8	3	3	3	11.1111	88.8889	33.3333	33.3333	33.3333	2.38889	grazer	small	Saarinen et al. 2016	682.667	Saarinen (new), based on species lists from Saarinen et al. (2016)	91.66	11.244	Leroi-Gourhan 1986	25	14.5	25.7	20	25	12	0.7	0	grazer	Rivals and Lister 2016
Equus	ferus	Equus ferus	Natural History Museum, London (NHMUK)	Kent's Cavern	Europe	UK	MIS3	0.04	27	487.048	23	2	21	3	16	4	8.69565	91.3043	13.0435	69.5652	17.3913	2.43478	grazer	large	Saarinen et al. 2016	706.667	Saarinen (new), based on species lists from Saarinen et al. (2016)	64	23	Campbell 1077	23	13.8	19	21.7	17.4	17.4	1.1	21.7	grazer	Rivals and Lister 2016
Equus	ferus (latipes)	Equus ferus (latipes)	Zoological Museum of the Zoological Institute RAS, St. Petersburg	Kostenki 14	Europe	Russia	MIS3	0.04	several (Kuzmina 1997)	507.053	5	1	4	1	2	2	20	80	20	40	40	2.4	grazer		Pushkina and Saarinen (new)
Equus	hydruntinus	Equus hydruntinus	van Asperen et al. 2012	Emine Bair Khosar Cave	Europe	Ukraine	MIS3	0.04	mean	234.36	2	0	2	0	1	1	0	100	0	50	50	2.75	grazer	small	Saarinen (new), based on data in van Asperen et al. 2012
Equus	ferus	Equus ferus	Museum für Naturkunde, Stuttgart	Aufhausener höhle	Europe	Germany	Weichselian	0.062	6	475.737	9	0	9	5	3	1	0	100	55.5556	33.3333	11.1111	2.27778	grazer	large	Saarinen et al. 2016
Equus	ferus	Equus ferus	Museum für Naturkunde, Stuttgart	Lampertheim in der Tanne (Oberrhein)	Europe	Germany	Weichselian	0.062	6	413.549														medium
Equus	ferus	Equus ferus	Museum für Naturkunde, Stuttgart	Villa Seckendorff	Europe	Germany	late MIS5	0.096	93	510.576	23	2	21	3	15	5	8.7	91.3	13	65.2	21.8	2.45652	grazer	large	Saarinen et al. 2016	632.545	Saarinen (new), based on species lists from Ziegler (1996)
Equus	hydruntinus	Equus hydruntinus	Museum für Naturkunde, Stuttgart	Villa Seckendorff	Europe	Germany	late MIS5	0.096	9	251.083	4	1	3	1	1	2	25	75	25	25	50	2.375	grazer	small	Saarinen (new)	632.545	Saarinen (new), based on species lists from Ziegler (1996)
Equus	ferus	Equus ferus	Institut für Quartärpaläontologie, Weimar	Taubach	Europe	Germany	MIS5e	0.116	8	531.62	8	2	6	2	4	2	25	75	25	50	25	2.25	grazer	large	Saarinen et al. 2016	934.5	Saarinen (new), based on species lists from van Kolfschoten (2000)
Equus	ferus	Equus ferus	Natural History Museum, London (NHMUK)	Brighton	Europe	UK	early MIS6	0.175	5	299.994	7	0	7	0	5	2	0	100	0	71.4	28.6	2.64286	grazer	small	Saarinen (new)	761.429	Saarinen (new), based on species lists from Schreve (1997))	81	20	Bates 2000
Equus	ferus	Equus ferus	Natural History Museum, London (NHMUK)	Crayford	Europe	UK	late MIS7	0.2	32	534.445	8	2	6	0	7	1	25	75	0	87.5	12.5	2.3125	grazer	large	Saarinen et al. 2016	972.545	Saarinen et al. (2021)b				19	23.5	20.9	31.6	5.3	0	1.2	15.8	grazer	Rivals and Lister 2016
Equus	ferus	Equus ferus	Natural History Museum, London (NHMUK)	Brundon	Europe	UK	MIS7	0.217	17	548.647	10	2	8	0	8	2	20	80	0	80	20	2.4	grazer	large	Saarinen et al. 2016	955.375	Saarinen et al. (2021)b				19	20.8	16.9	47.4	0	5.3	1.2	42.1	mixed	Rivals and Lister 2016
Equus	ferus	Equus ferus	Natural History Museum, London (NHMUK)	Ilford	Europe	UK	MIS7	0.217	23	573.28	6	2	4	2	3	1	33.3333	66.6667	33.3333	50	16.6667	2.08333	grass-dom.	very large	Saarinen et al. 2016	955.375	Saarinen et al. (2021)b	44.5625	15.6667	West et al. 1964	21	16.6	19.4	28.6	28.6	0	1.3	19	grazer	Rivals and Lister 2016
Equus	mosbachensis	Equus mosbachensis	Rivals et al. 2015	Schöningen	Europe	Germany	MIS9	0.32	36	573.958	2	2	0	1	1	0	100	0	50	50	0	1.25	browse-dom.	very large	Saarinen et al. 2021a	886.5	Saarinen et al. (2021)b	19.3125	6.73333	Urban and Bigga 2015	71	158.8	118	43.6		4.2	1.09		browse-dom.	Rivals et al. 2015
Equus	ferus	Equus ferus	Natural History Museum, London (NHMUK)	Grays Thurrock	Europe	UK	MIS9	0.32	1	530.649	7	1	6	3	4	0	14.3	85.6	42.9	57.1	0	2.14286	grass-dom.	large	Saarinen et al. 2021a	992.273	Saarinen et al. (2021)b	19.2	13.7	Gibbard 1994	17	19.1	18.1	76.5	58.8	0	1.6	23.5	grass-dom./mixed	Rivals and Lister 2016
Equus	ferus	Equus ferus	Museum für Naturkunde, Stuttgart	Frankenbacher sande	Europe	Germany	MIS11	0.4	10	589.106														very large
Equus	ferus	Equus ferus	Natural History Museum, London (NHMUK)	Hoxne	Europe	UK	MIS11	0.4	3	472.782	10	4	6	2	8	0	40	60	20	80	0	2	grass-dom.	large	Saarinen et al. 2016	978.444	Saarinen et al. (2021)b	23.5489		Mullenders 1992	7	26.9	21.9	14.3	0	0	1.1	0	grass-dom.	Rivals and Lister 2016
Equus	ferus	Equus ferus	Museum für Naturkunde, Stuttgart	Steinheim a.d. Murr, grube Sammet	Europe	Germany	MIS11	0.4	28	511.374	22	3	19	2	14	6	13.6364	86.3636	9.09091	63.6364	27.2727	2.45455	grazer	large	Saarinen et al. 2016
Equus	ferus	Equus ferus	Museum für Naturkunde, Stuttgart	Steinheim a.d. Murr, grube Sigrist	Europe	Germany	MIS11	0.4	7	525.231														large		1004	Saarinen et al. (2021)b
Equus	ferus	Equus ferus	Natural History Museum, London (NHMUK)	Swanscombe	Europe	UK	MIS11	0.4	5	504.752	7	2	5	0	6	1	28.5714	71.4286	0	85.7143	14.2857	2.28571	grazer	large	Saarinen et al. 2016	1162.27	Saarinen et al. (2021)b	31.6136	14.5	Conway 1996, Hubbard 1996	2	20.8	21.8	50	0	0	1		grazer	Rivals and Lister 2016
Equus	mosbachensis?	Equus cf. mosbachensis	Istituto Italiano di Paleontologia Umana, Anagni	Fontana Ranuccio	Europe	Italy	MIS11	0.4	6	408.359	10	0	10	3	5	2	0	100	30	50	20	2.45	grazer	medium	Strani et al. 2019; Strani 2020			13.9583		Corrado and Magri 2011
Equus	capensis	Equus capensis	South African Museum of Natural History, Cape Town	Elandsfontein	Africa	South Africa		0.45	1	653.197	14	10	4	4	5	1	71	29	40	50	10	1.39286	mixed	very large	Kaiser and Franz-Odendaal 2004
Equus	mosbachensis	Equus mosbachensis	Kaiser and Franz-Odendaal 2004	Caune d'Arago	Europe	France	MIS12	0.45	6	524.23	118	25	93	22	62	30	79	21	19	54	26	2.28814	grazer	large	Kaiser and Franz-Odendaal 2004
Equus	mosbachensis	Equus mosbachensis	Natural History Museum, London (NHMUK)	Boxgrove	Europe	UK	MIS13	0.5	1*	562.208	2	2	0	1	1	0	100	0	50	50	0	1.25	browse-dom.	very large	Saarinen et al. 2021a	1032.8	Saarinen et al. (2021)b	8.5		Roberts 1986	7	19.1	17.6	57.1	0	28.6	1.3	42.9	mixed	Rivals and Lister 2016
Equus	mosbachensis	Equus mosbachensis	Museum für Naturkunde, Karlsruhe	Mauer	Europe	Germany	MIS15	0.6	14	578.907	7	2	5	2	5	0	28.5714	71.4286	28.5714	71.4286	0	2.07143	grass-dom.	very large	Saarinen et al. 2016	1332.27	Saarinen et al. (2021)b	25.6895	13.4231	Urban 1992
Equus	mosbachensis	Equus mosbachensis	Hessisches Landesmuseum, Darmstadt	Mosbach	Europe	Germany	MIS15	0.6	18	580.816	5	2	3	3	2	0	40	60	60	40	0	1.8	mixed	very large	Saarinen et al. 2021a	1191	Saarinen et al. (2021)b
Equus	mosbachensis?	Equus cf. mosbachensis	Department of Earth Sciences, Sapienza University of Rome	Cava di Breccia - Casal Selce 2	Europe	Italy	MIS15	0.6			7	0	7	0	1	6	0	100	0	14.3	85.7	2.92857	grazer		Strani et al. 2022
Equus	ferus?	Equus cf. ferus	Institut Català de Paleontologia Miquel Crusafont, Sabadell	Vallparadis Estacio EVT3	Europe	Spain	MIS15	0.6			12	3	9	1	8	3	25	75	8.33333	66.6667	25	2.33333	grazer		Strani 2019						2	8	16.5	0	0	0	0	50	mixed feeder	Strani 2019
Equus	altidens?	Equus altidens?	Natural History Museum, London (NHMUK)	Trimingham	Europe	UK	Cromerian? MIS15?	0.6	1	355.523	4	1	3	0	4	0	25	75	0	100	0	2.25	grazer	small	Saarinen (new)
Equus	altidens	Equus altidens	Institut für Quartärpaläontologie, Weimar	Süssenborn	Europe	Germany	MIS16	0.65	22	360.934	20	7	13	2	17	1	35	65	10	85	5	2.125	grass-dom.	small	Saarinen et al. 2021a	766.643	Saarinen et al. (2021)b
Equus	suessenbornensis	Equus suessenbornensis	Institut für Quartärpaläontologie, Weimar	Süssenborn	Europe	Germany	MIS16	0.65	27	570.788	14	9	5	5	7	2	64.29	35.71	35.71	50	14.29	1.75	mixed	very large	Saarinen et al. 2021a	766.643	Saarinen et al. (2021)b
Equus	suessenbornensis	Equus suessenbornensis	Natural History Museum, London (NHMUK)	West Runton	Europe	UK	MIS17	0.7	2	539.864	2	1	1	2	0	0	50	50	100	0	0	1.5	mixed	large	Saarinen (new)	844.583	Saarinen et al. (2021)b	44.6	32.8	Field and Peglar 2010
Equus	altidens	Equus altidens	Natural History Museum, London (NHMUK)	West Runton	Europe	UK	MIS17	0.7			3	1	2	1	2	0	33.3	66.7	33.3	66.7	0	2	grass-dom.	small	Saarinen (new)	844.583	Saarinen et al. (2021)b	44.6	32.8	Field and Peglar 2010	3	18	17.5	0	0	0.7	0	66.7	mixed	Rivals and Lister 2016
Equus	suessenbornensis	Equus suessenbornensis	Museo Nacional de Ciencias Naturales-CSIC (MNCN), Madrid	Cullar Baza	Europe	Spain		0.7	2	549.029	18	9	9	10	8	0	50	50	56	44	0	1.72222	mixed	very large	Saarinen (new)
Equus	mauritanicus	Equus mauritanicus	Vera Eisenmann website	Ternifine	Africa	Algeria		0.7	74	358.764														small	Saarinen (new)
Equus	altidens	Equus altidens	Institut Català de Paleontologia Miquel Crusafont, Sabadell	Vallparadis Estacio EVT7	Europe	Spain	MIS21	0.858			22	5	17	1	17	4	22.7273	77.2727	4.54545	77.2727	18.1818	2.34091	grazer		Strani et al. 2019; Strani 2020						7	12.5714	18.7143	28.5714	0	42.8571	0	42.8571	mixed feeder	Strani 2019
Equus	altidens	Equus altidens	Institut Català de Paleontologia Miquel Crusafont, Sabadell	Vallparadis Estacio EVT12	Europe	Spain	MIS31	1	5	373.54	8	2	6	0	6	2	25	75	0	75	25	2.375	grazer	small	Strani et al. 2019; Strani 2020	1297.12	Saarinen et al. (2021)b	26.5			5	8.6	22	40	20	40	0.2	0	grazer	Strani 2019
Equus	nalaikhaensis	Equus nalaikhaensis	Paleontological Institute, Moscow	Nalaikha	Asia	Siberia		1	19	398.901														medium
Equus	suessenbornensis	Equus suessenbornensis	S. Janashia Museum of Georgia, Georgian National Museum, Tbilisi	Akhalkalaki	Europe	Georgia		1	129	631.091	9	5	4	4	5	0	55.6	44.4	44.5	55.6	0	1.72222	mixed	very large	Saarinen (new)	852.9	Saarinen et al. (2021)b
Equus	apolloniensis	Equus apolloniensis	Gkeme et al. 2020	Apollonia	Europe	Greece		1.15	12	427.174	3	0	3	0	1	2	0	100	0	33.3	66.7	2.83333	grazer	medium	Saarinen (new)	560.636	Saarinen et al. (2021)b
Equus	stenonis	Equus stenonis	Museum National d'Histoire Naturelle, Paris	Sainzelles	Europe	France		1.3	3	470.778														large		1222.17	Saarinen et al. (2021)b
Equus	altidens	Equus altidens	Archaeological museum of Granada	Fuente Nueva 3	Europe	Spain		1.3	3	383.522	14	5	9	7	7	0	35.7143	64.2857	50	50	0	1.89286	grass-dom.	small	Saarinen et al. 2021b	914.444	Saarinen et al. (2021)b
Equus	suessenbornensis	Equus suessenbornensis	Archaeological museum of Granada	Fuente Nueva 3	Europe	Spain		1.3	2	615.563	4	3	1	4	0	0	75	25	100	0	0	1.25	browse-dom.	very large	Saarinen et al. 2021b	914.444	Saarinen et al. (2021)b
Equus	altidens	Equus altidens	Archaeological museum of Granada	Barranco León	Europe	Spain		1.4			8	2	6	3	5	0	25	75	37.5	62.5	0	2.0625	grass-dom.	small	Saarinen et al. 2021b	914.444	Saarinen et al. (2021)b
Equus	suessenbornensis	Equus suessenbornensis	Archaeological museum of Granada	Barranco León	Europe	Spain		1.4	1	753.356	4	4	0	4	0	0	100	0	100	0	0	1	browse-dom.	very large	Saarinen et al. 2021b	914.444	Saarinen et al. (2021)b
Equus	altidens	Equus altidens	Museo di Storia Naturale, Sezione di Geologia e Paleontologia, Università di Firenze	Pirro Nord	Europe	Italy		1.45	72	337.883	2	0	2	0	1	1	0	100	0	50	50	2.75	grazer	small	Saarinen et al. 2021a	843.714	Saarinen et al. (2021)b
Equus	oldowayensis	Equus oldowayensis	Kenyan Natural History Museum, East Rudolf, Nairobi	TKII/OLD63	Africa	Tanzania		1.47	54	415.126														medium	Saarinen (new)
Equus	altidens	Equus altidens	Archaeological museum of Granada	Venta Micena	Europe	Spain		1.5	12	362.267	20	3	17	5	13	2	15	85	25	65	10	2.275	grazer	small	Saarinen et al. 2021b	766.583	Saarinen et al. (2021)b
Equus	major	Equus major	Natural History Museum, London (NHMUK)	East Runton	Europe	UK	Pastonian?	1.75	6	714.982	2	2	0	0	2	0	100	0	0	100	0	1.5	mixed	very large	Saarinen (new)	752.3	Saarinen (new), based on species lists from Lister (1993), and Rivals and Lister (2016)				3	27.7	15.5	0	0	0	1	66.7	browse-dom./mixed	Rivals and Lister 2016
Equus	stenonis	Equus stenonis	Natural History Museum, London (NHMUK)	East Runton	Europe	UK	Pastonian?	1.75	1	512.011	2	1	1	1	1	0	50	50	50	50	0	1.75	mixed	large	Saarinen (new)	752.3	Saarinen (new), based on species lists from Lister (1993), and Rivals and Lister (2016)
Equus	stehlini	Equus stehlini	Museo di Storia Naturale, Sezione di Geologia e Paleontologia, Università di Firenze	Casa Frata (Upper Valdarno Basin)	Europe	Italy		1.8	66	293.625														small		946.444	Saarinen et al. (2021)b
Equus	stenonis mygdoniensis	Equus mygdoniensis	Koufos et al. 1992	Mygdona Basin	Europe	Greece		1.8	18	303.202														small	Saarinen (new)
Equus	stenonis	Equus stenonis	S. Janashia Museum of Georgia, Georgian National Museum, Tbilisi	Dmanisi	Europe	Georgia		1.81	3	473.759	4	2	2	0	4	0	50	50	0	100	0	2	grass-dom.	large	Saarinen (new)	705.294	Saarinen et al. (2021)b	32		Messager et al. 2010
Equus	altidens	Equus altidens	S. Janashia Museum of Georgia, Georgian National Museum, Tbilisi	Dmanisi	Europe	Georgia		1.81	3	305.834	2	0	2	1	0	1	0	100	50	0	50	2.5	grazer	small	Saarinen (new)	705.294	Saarinen et al. (2021)b	32		Messager et al. 2010
Equus	major	Equus major	Natural History Museum, London (NHMUK)	Norwich Crag	Europe	UK	Pre-Pastonian	1.85	1	639.669	4	4	0	3	1	0	100	0	75	25	0	1.125	browse-dom.	very large	Saarinen (new)	907.273	Saarinen (new) based on species lists in Williams (1970)
Equus	stenonis	Equus stenonis	Museo di Storia Naturale, Sezione di Geologia e Paleontologia, Università di Firenze	Matassino Poggiorosso (Upper Valdarno Basin)	Europe	Italy		1.85	20	410.485														medium		1131.43	Saarinen et al. (2021)b
Equus	stenonis	Equus stenonis	Museo di Storia Naturale, Sezione di Geologia e Paleontologia, Università di Firenze	Matassino Solava (Upper Valdarno Basin)	Europe	Italy		1.85	43	446.922														medium
Equus	tabeti	Equus tabeti	Vera Eisenmann website	Ain Hanech	Africa	Algeria		1.87	39	260.522														small	Saarinen (new)
Equus	stenonis	Equus stenonis	Museo di Storia Naturale, Sezione di Geologia e Paleontologia, Università di Firenze	Olivola	Europe	Italy		1.95	105	442.267	5	0	5	0	2	3	4.8	95.2	28.6	38.1	28.6	2.8	grazer	medium	Strani et al. 2019; Strani 2020	924.9	Saarinen et al. (2021)b
Equus	stenonis	Equus stenonis	Institut Català de Paleontologia Miquel Crusafont, Sabadell; Museum National d'Histoire Naturelle, Paris	Puebla de Valverde	Europe	Spain		2	3	421.866	6	0	6	1	3	2	0	100	16.7	50	33.3	2.58333	grazer	medium	Saarinen (new)	988.417	Saarinen et al. (2021)b
Equus	stenonis	Equus stenonis	Athanassiou, 2001	Sesklo	Europe	Greece		2	6	437.267													grazer	medium	Rivals and Athanassiou 2009	642.154	Saarinen et al. (2021)b				9	17.67	24.72	10	22.2	0	1.1	0	grazer	Rivals and Athanassiou 2008
Equus	stenonis	Equus stenonis	Koufos & Vlachou, 1997	Volax	Europe	Greece		2	3	474.398														large		534.545	Saarinen et al. (2021)b
Equus	cf. stenonis	Equus stenonis	Eisenmann, 2002	Vatera	Europe	Greece		2.1	3	419.787														medium
Equus	major	Equus major	Universitè Claude Bernard-1, Facultè des Science, Lyon	Senèze	Europe	France		2.1	5	688.397														very large		910.5	Saarinen et al. (2021)b	40		Roger et al. 2000
Equus	senezensis	Equus senezensis	Natural History Museum, Musée des Confluences, Lyon - Universitè Claude Bernard-1, Facultè des Science, Lyon	Senèze	Europe	France		2.1	52	327.047	5	0	5	2	2	1	0	100	40	40	20	2.4	grazer	small	Saarinen et al. 2021a	910.5	Saarinen et al. (2021)b	40		Roger et al. 2000
Equus	senezensis	Equus senezensis	Istituto Italiano di Paleontologia Umana, Anagni	Coste San Giacomo	Europe	Italy		2.1	15	376.883	20	5	15	7	9	4	25	75	35	45	20	2.175	grass-dom.	medium	Strani et al. 2019; Strani 2020	1234.15	Saarinen et al. (2021)b	39		Bellucci et al. 2014
Equus	koobiforensis	Equus koobiforensis	Kenyan Natural History Museum, East Rudolf, Nairobi	Koobi Fora	Africa	Kenya		2.1	9	343.128	3	0	3	0	2	1	0	100	0	66.7	33.3	2.66667	grazer	small	Saarinen (new)
Equus	major	Equus major	Teylers Museum, Haarlem	Tegelen	Europe	Netherlands		2.3	2	590.437	1	1	0	1	0	0	100	0	100	0	0	1	browse-dom.	very large	Saarinen (new)	1439.71	Saarinen et al. (2021)b
Equus	cf. major	Equus major	Universitè Claude Bernard-1, Facultè des Science, Lyon	Pardines	Europe	France		2.3	1	633.374														very large		723.5	Saarinen et al. (2021)b
Equus	stenonis	Equus stenonis	Universitè Claude Bernard-1, Facultè des Science, Lyon	Perrier	Europe	France		2.3	2	523.379														large
Equus	stenonis guthi	Equus stenonis	Boeuf, 1986	Chilhac	Europe	France		2.3	18	395.927														medium		946.444	Saarinen et al. (2021)b
Equus	stenonis	Equus stenonis	Koufos & Kostopoulos,1993	Dafnero	Europe	Greece		2.35	3	485.64														large		634.778	Saarinen et al. (2021)b
Equus	stenonis	Equus stenonis	Natural History Museum, Musée des Confluences, Lyon	Saint Vallier	Europe	France		2.4	168	456.607	4	0	4	0	4	0	0	100	0	100	0	2.5	grazer	medium	Saarinen et al. 2021a	1013.6	Saarinen et al. (2021)b	30.5943	9.2675	Argant 2004
Equus	numidicus	Equus numidicus	Vera Eisenmann website	Ain Boucherit	Africa	Algeria		2.44	10	344.843	4	0	4	0	3	1	0	100	0	75	25	2.625	grazer	small	Saarinen (new)
Equus	major	Equus major	Natural History Museum, London (NHMUK)	Red Crag	Europe	Europe	Pre-Ludhamian	2.5	2	618.6	2	2	0	1	1	0	100	0	50	50	0	1.25	browse-dom.	very large	Saarinen (new)	1152	Saarinen (new) based on species lists in Williams 1970; Lister 1999; Rivals and Lister 2016	28.0952	6.59091	Zalasiewich et al. 1988
Equus	livenzovensis	Equus livenzovensis	Museo di Storia Naturale, Sezione di Geologia e Paleontologia, Università di Firenze	Montopoli	Europe	Italy		2.5	1	601.275														very large		1090.33	Saarinen et al. (2021)b
Equus	livenzovensis	Equus livenzovensis	Forsten 1997; Vera Eisenmann website	Livenzovka	Europe	Russia		2.5	4	503.082														large		798.611	Saarinen et al. (2021)b
Equus	livenzovensis	Equus livenzovensis	Alberdi et al., 1997	El-Rincon 1	Europe	Spain		2.6	33	502.899														large
Equus	eisenmannae	Equus eisenmannae	Institute of Vertebrate Palaeontology and Palaeoanthropology, Beijing	Longdan	Asia	China		2.55	189	491.607	5	0	5	0	3	2	0	100	0	60	40	2.7	grazer	large	Saarinen (new)
Equus	simplicidens	Equus simplicidens	United States National Museum of Natural History, Washington D.C.	Hagerman H.Q.	North America	USA		3.5	51	330.107	13	0	13	0	8	5	0	100	0	0.615	0.385	2.69231	grazer	small	Saarinen (new)
Equus	cedralensis	Equus cedralensis	Paleontological Collection of the Archeozoology Laboratory ‘M. en C. Ticul Álvarez Solórzano’, Subdirección de Laboratorios y Apoyo Académico, Instituto Nacional de Antropología e Historia (INAH), Mexico City, Mexico	Cedral	North America	Mexico			8	138.41	26	1	25	3	14	9	3.84615	96.1538	11.5385	53.8462	34.6154	2.57692	grazer	small	Barrón-Ortiz et al. 2014	670.667	Saarinen (new) based on species lists in Álvarez et al. (2012) and Alberdi et al. (2014)
Equus	conversidens	Equus conversidens	Paleontological Collection of the Archeozoology Laboratory ‘M. en C. Ticul Álvarez Solórzano’, Subdirección de Laboratorios y Apoyo Académico, Instituto Nacional de Antropología e Historia (INAH), Mexico City, Mexico	Cedral	North America	Mexico			2	249.08	24	1	23	8	10	6	4.16667	95.8333	33.3333	41.6667	25	2.41667	grazer	small	Barrón-Ortiz et al. 2014	670.667	Saarinen (new) based on species lists in Álvarez et al. (2012) and Alberdi et al. (2014)
Equus	mexicanus	Equus mexicanus	Paleontological Collection of the Archeozoology Laboratory ‘M. en C. Ticul Álvarez Solórzano’, Subdirección de Laboratorios y Apoyo Académico, Instituto Nacional de Antropología e Historia (INAH), Mexico City, Mexico	Cedral	North America	Mexico			10	456.23	25	2	23	3	21	1	8	92	12	84	4	2.38	grazer	large	Barrón-Ortiz et al. 2014	670.667	Saarinen (new) based on species lists in Álvarez et al. (2012) and Alberdi et al. (2014)
Equus	cedralensis	Equus cedralensis	Palaeontological collection at the Biology Faculty of the Universidad Michoacana de San Nicolas de Hidalgo, Morelia, Michoacán, Mexico	La Cinta-Portalitos	North America	Mexico			7	145.5	37	21	16	9	23	5	56.8	43.2	24.3	62.2	13.5	1.87838	grass-dom.	small	Marín-Leyva et al., 2016a	730.6	Saarinen (new) based on species lists in Barrón-Ortiz et al. (2019)
Equus	conversidens	Equus conversidens	Palaeontological collection at the Biology Faculty of the Universidad Michoacana de San Nicolas de Hidalgo, Morelia, Michoacán, Mexico	La Cinta-Portalitos	North America	Mexico			2	344.7	56	16	40	12	38	6	28.6	71.4	21.4	67.9	10.7	2.16071	grazer	small	Marín-Leyva et al., 2016a	730.6	Saarinen (new) based on species lists in Barrón-Ortiz et al. (2019)
Equus	mexicanus	Equus mexicanus	Palaeontological collection at the Biology Faculty of the Universidad Michoacana de San Nicolas de Hidalgo, Morelia, Michoacán, Mexico	La Cinta-Portalitos	North America	Mexico					13	1	12	3	5	5	7.7	92.3	23.1	38.5	38.5	2.5	grazer		Marín-Leyva et al., 2016a	730.6	Saarinen (new) based on species lists in Barrón-Ortiz et al. (2019)
Equus	cedralensis	Equus cedralensis	Palaeontological collection at the Biology Faculty of the Universidad Michoacana de San Nicolas de Hidalgo, Morelia, Michoacán, Mexico	La Piedad-Santa Ana	North America	Mexico			3	126	19	4	15	3	15	1	21	78.9	15.8	78.9	5.3	2.23684	grass-dom.	small	Marín-Leyva et al., 2016a
Equus	conversidens	Equus conversidens	Palaeontological collection at the Biology Faculty of the Universidad Michoacana de San Nicolas de Hidalgo, Morelia, Michoacán, Mexico	La Piedad-Santa Ana	North America	Mexico			7	297.3	20	0	20	3	13	4	0	100	15	65	20	2.525	grazer	small	Marín-Leyva et al., 2016a
Equus	mexicanus	Equus mexicanus	Palaeontological collection at the Biology Faculty of the Universidad Michoacana de San Nicolas de Hidalgo, Morelia, Michoacán, Mexico	La Piedad-Santa Ana	North America	Mexico			1	476.7	15	2	13	3	10	2	13.3	86.7	20	66.7	13.3	2.33333	grazer	large	Marín-Leyva et al., 2016a
Equus	conversidens	Equus conversidens	Vertebrate Paleobiology Collection, Laboratory for Environmental Biology, University of Texas at El Paso (UTEP; El Paso, Texas, USA); and the Vertebrate Paleontology collection of the Vertebrate Paleontology Laboratory, Jackson School Museum of Earth History, University of Texas at Austin (TMM; Austin, Texas, USA)	Dark Canyon Cave	North America	USA					8	0	8	0	5	3	0	100	0	62.5	37.5	2.6875	grazer		Barrón-Ortiz et al. 2019	706.667	Saarinen (new) based on species lists in Harris (2008-2019)
Equus	conversidens	Equus conversidens	Vertebrate Paleobiology Collection, Laboratory for Environmental Biology, University of Texas at El Paso (UTEP; El Paso, Texas, USA)	Dry Cave (LGM)	North America	USA			9	297.137	2	0	2	0	1	1	0	100	0	50	50	2.75	grazer	small	Barrón-Ortiz et al. 2019	299	Saarinen (new) based on species lists in Harris (2008-2019)
Equus	conversidens	Equus conversidens	Vertebrate Paleobiology Collection, Laboratory for Environmental Biology, University of Texas at El Paso (UTEP; El Paso, Texas, USA)	Dry Cave (Post-LGM)	North America	USA			9	297.137	4	1	3	1	3	0	25	75	25	75	0	2.125	grass-dom.	small	Barrón-Ortiz et al. 2019	299	Saarinen (new) based on species lists in Harris (2008-2019)
Equus	conversidens	Equus conversidens	Vertebrate Paleontology collection of the Vertebrate Paleontology Laboratory, Jackson School Museum of Earth History, University of Texas at Austin (TMM; Austin, Texas, USA)	Blackwater Draw	North America	USA			1	357.812	7	1	6	1	4	2	14.2857	85.7143	14.2857	57.1429	28.5714	2.42857	grazer	small	Barrón-Ortiz et al. 2019	678.273	Saarinen (new) based on species lists in Harris (2008-2019)
Equus	scotti	Equus scotti	Vertebrate Paleobiology Collection, Laboratory for Environmental Biology, University of Texas at El Paso (UTEP; El Paso, Texas, USA)	Dry Cave (LGM)	North America	USA			15	494.775	6	2	4	1	4	1	33.3333	66.6667	16.6667	66.6667	16.6667	2.16667	grass-dom.	large	Barrón-Ortiz et al. 2019	299	Saarinen (new) based on species lists in Harris (2008-2019)
Equus	scotti	Equus scotti	Vertebrate Paleontology collection of the Vertebrate Paleontology Laboratory, Jackson School Museum of Earth History, University of Texas at Austin (TMM; Austin, Texas, USA)	Blackwater Draw	North America	USA					8	2	6	3	3	2	25	75	37.5	37.5	25	2.1875	grass-dom.		Barrón-Ortiz et al. 2019	678.273	Saarinen (new) based on species lists in Harris (2008-2019)
Equus	lambei	Equus lambei	Archaeology Collection (Bluefish Caves; MgVo-1, 2, and 3) of the Canadian Museum of History (CMH; Gatineau, Quebec, Canada)	Bluefish Caves (Post-LGM and Pre-LGM/LGM data combined)	North America	Canada			several (Weinstock et al. 2005))	389.292	13	1	12	3	8	2	7.69231	92.3077	23.0769	61.5385	15.3846	2.38462	grazer		Barrón-Ortiz et al. 2019	586.778	Saarinen (new) based on species lists in Harington (2011)
Equus	occidentalis	Equus occidentalis	Cohen et al. 2021	Rancho la Brea	North America	USA			several (Willoughby 1948)	570.249	103	9	94	31	49	23	8.7	91.3	30.1	47.6	22.3	2.37379	grazer	very large	Cohen et al. 2021	838.5	Saarinen (new) based on species list in: https://tarpits.org/research-collections/tar-pits-collections/mammal-collections
Eurygnathohippus	sp.	Eurygnathohippus sp.	Wolf et al. 2010	Makuyuni	Africa	Tanzania	Early Pleistocene	1.47		258.71							12.5	87.5	0	37.5	62.5	2.6875	grazer	large	Wolf et al. 2010
Proboscidipparion	sp.	Proboscidipparion sp.	Natural History Museum, London (NHMUK)	Red Crag	Europe	UK	Late Pliocene	2.7		260.167							100	0	0	100	0	1.5	mixed	large	Rivals and Lister 2016, Saarinen this wolume	1370.9	Saarinen (new) based on species lists in Williams 1970; Lister 1999; Rivals and Lister 2016	9.41046	0.573248	Head 1998	11	31.1	13.7	54.5	18.2	72.2	1.1	90.9	browse-dom.	Rivals and Lister 2016
Baryhipparion	tchicoicum	Baryhipparion tchicoicum	IVPP	Udunga	Asia	Russia	Pliocene (3.4 - 3 Ma)	3.2		150.979							75	25	50	25	25	1.625	grass-dom.	medium	Nakaya et al. 2009
Eurygnathohippus	woldegabrieli	Eurygnathohippus woldegabrieli	National Museum of Ethiopia	Aramis	Africa	Ethiopia	Early Pliocene	4.4		260.04							38	62	1	57	42	2.325	grazer	large	Bernor et al. 2013
Eurygnathohippus	hooijeri	Eurygnathohippus hooijeri	South African Museum of Natural History, Cape Town	Langebaanweg	Africa	South Africa	Early Pliocene	4		247.834							50	50	23	55	23	2.01	grass-dom.	large	Bernor and Kaiser 2006
Eurygnathohippus	feibeli	Eurygnathohippus feibeli	National Museum of Ethiopia / Kenia National Museum, Nairobi	several localities	Africa	Kenya/Ethiopia	Late Miocene	6		218.616							72.78	27.22	0	96.67	3.33	1.78885	grass-dom.	large	Melcher et al. 2014
Cremohipparion	periafricanum	Cremohipparion periafricanum	Finnish Museum of Natural History, Helsinki	Valdecebro	Europe	Spain	MN 13	6.2		71.9402							0	100	0	80	20	2.6	grazer	small	Saarinen, this wolume
Hippotherium	kammerschmittae	Hippotherium kammerschmittae	Seckenberg Museum, Frankfurt	Dorn-Dürkheim	Europe	Germany	MN 11	8.25		190							93	7	88	13	0	1.14	browse-dom.	medium	Kaiser and Bernor 2006
Hippotherium	aff. primigenium	Hippotherium aff. primigenium	Seckenberg Museum, Frankfurt	Dorn-Dürkheim	Europe	Germany	MN 11	8.25		212.721							96.7	3.3	56.2	43.8	0	1.252	browse-dom.	large	Kaiser and Bernor 2006
Hippotherium	malpassi	Hippotherium malpassi	Museo di Storia Naturale, Sezione di Geologia e Paleontologia, Università di Firenze	several localities	Europe	Italy	MN 12 - MN 13	6.35		196.413							81.71	18.29	21.19	78.81	0	1.57695	grass-dom.	medium	Bernor et al. 2011
Hipparionini	indet.	Hipparionini indet.	American Museum of Natural Histroy, New York	Samos	Europe	Greece	MN 12 - MN 13	6.35									60	40	0	100	0	1.9	grass-dom.		Jokela 2015
Hipparionini	sp. Unit 4	Hipparionini sp. Unit 4	Harvad University, Cambridge - American Museum of Natural Histroy, New York	Siwaliks	Asia	Pakistan	7.69 - 6.2 Ma	6.95									100	0	0	100	0	1.5	mixed		Wolf et al. 2013
Hipparionini	indet.	Hipparionini indet.	Museum National d’Histoire Naturelle, Paris	Pikermi	Europe	Greece	MN12	7.35									71.4	28.6	0	100	0	1.786	grass-dom.		Jokela 2015
Cremohipparion	moldavicum	Cremohipparion moldavicum	Museum National d’Histoire Naturelle, Paris	Maragheh	Europe	Iran	MN 12	7.35		149.446							100	0	33.33	66.67	0	1.33335	mixed	medium	Bernor et al. 2014
Cremohipparion	matthewi	Cremohipparion matthewi	Museum National d’Histoire Naturelle, Paris - Muze Melli Tarikh Tabeie, Tehran	Maragheh	Europe	Iran	MN 12	7.35		107.579							0	100	0	100	0	2.5	grazer	small	Bernor et al. 2014
Hipparion	prostylum	Hipparion prostylum	Museum National d’Histoire Naturelle, Paris - Muze Melli Tarikh Tabeie, Tehran	Maragheh	Europe	Iran	MN 12	7.35		152.344							100	0	0	100	0	1.5	mixed	medium	Bernor et al. 2014
Hipparion	dietrichi	Hipparion dietrichi	American Museum of Natural Histroy, New York	Maragheh	Europe	Iran	MN 12	7.35		194.957							100	0	0	100	0	1.5	mixed	medium	Bernor et al. 2014
Hipparion	campbelli	Hipparion campbelli	Muze Melli Tarikh Tabeie, Tehran	Maragheh	Europe	Iran	MN 12	7.35		204.016							100	0	0	100	0	1.5	mixed	medium	Bernor et al. 2014
Hippotherium	microdon	Hippotherium microdon	Hungarian Institute of Geology and Geophysics, Budapest	Baltavar	Europe	Hungary	MN 12	7.35		188.411							100	0	29.8	70.2	0	1.351	mixed	medium	Kaiser and Bernor 2006
"Cormohipparion"	sp.	"Cormohipparion" sp.	Niedersächsisches Landesamt für Boden forschung/ Bundesanstalt für Geowissenschaften und Rohstoffe, Hannover.	Chorora	Africa	Ethiopia	8.5 Ma	8.5		160							100	0	49.6	50.4	0	1.252	browse-dom.	medium	Bernor et al. 2004
Hipparionini	sp. Unit 3	Hipparionini sp. Unit 3	Harvad University, Cambridge - American Museum of Natural Histroy, New York	Siwaliks	Asia	Pakistan	8.69 - 7.7 Ma	8.2									93.1	6.9	3.45	89.66	6.9	1.58635	grass-dom.		Wolf et al. 2013
Hipparionini	sp. Unit 2	Hipparionini sp. Unit 2	Harvad University, Cambridge - American Museum of Natural Histroy, New York	Siwaliks	Asia	Pakistan	MN 10 (9.69 - 8.7 Ma)	9.2									94.59	5.41	2.7	94.59	2.7	1.554	grass-dom.		Wolf et al. 2013
Hippotherium	sumegense	Hippotherium sumegense	Hungarian Institute of Geology and Geophysics, Budapest	Sümeg	Europe	Hungary	MN 9 - MN 10	10.05		210.884							100	0	50	50	0	1.25	browse-dom.	large	Kaiser and Bernor 2006
Hippotherium	primigenium	Hippotherium primigenium	Seckenberg Museum, Frankfurt	Eppelsheim	Europe	Germany	MN 9	10.55		247.198							96.6	3.4	15.7	84.3	0	1.456	mixed	large	Kaiser and Bernor 2006
Hippotherium	primigenium	Hippotherium primigenium	Hessisches Landesmuseum, Darmstadt - Staatliches Museum für Naturkunde, Karlsruhe	Hoewenegg	Europe	Germany	MN 9	10.55		245.406							100	0	78.9	21.1	0	1.1055	browse-dom.	large	Kaiser and Bernor 2006
Hippotherium	intrans	Hippotherium intrans	Hungarian Institute of Geology and Geophysics, Budapest	Rudabanya	Europe	Hungary	MN 9	10.55		259.577							96	4	50	50	0	1.29	browse-dom.	large	Kaiser and Bernor 2006
Hipparionini	sp. Unit 1	Hipparionini sp. Unit 1	Harvad University, Cambridge - American Museum of Natural Histroy, New York	Siwaliks	Asia	Pakistan	MN 9 (10.7 - 9.7 Ma)	10.2									100	0	14.29	85.71	0	1.42855	mixed		Wolf et al. 2013
Cormohipparion	quinni	Cormohipparion quinni	American Museum of Natural Histroy, New York	Great Plains	North America	USA	late Barstovian	14.1		135.132							94	6	20	80	0	1.46	mixed	medium	Bravo-Cuevas and Priego-Vargas 2009
Cormohipparion	goorisi	Cormohipparion goorisi	American Museum of Natural Histroy, New York	Gulf Coastal Plain	North America	USA	late early - early late Barstovian	14.6		98.6115							100	0	0	100	0	1.5	mixed	small	Bravo-Cuevas and Priego-Vargas 2009
Cormohipparion	aff. quinni	Cormohipparion aff. quinni	American Museum of Natural Histroy, New York	Oaxaca	North America	Mexico	16 Ma (late early Barstovian)	16		118.523							53.3	46.6	10.3	86.2	3.4	1.93	grass-dom.	medium	Bravo-Cuevas and Priego-Vargas 2009
References
Alberdi, M. T., Arroyo-Cabrales, J., Marín-Leyva, A. H., Polaco, O. J. 2014. Study of Cedral horses and their place in the Mexican Quaternary. Revista Mexicana de Ciencias Geológicas. 31: 221–237.
Álvarez, T., Ocaña Marín, A., Arroyo-Cabrales, J. 2012. Restos de mamíferos. Pp. 147–194 in L. E. Mirambell, coord. Rancho “La Amapola”, Cedral: Un sitio arqueológico-paleontológico pleistocénico-holocénico con restos de actividad humana. Instituto Nacional de Antropologia e Historia, Mexico City.
Andreev, A.A., Tarasov, P.E., 2007. Postglacial pollen records of Northern Asia. Encyclopedia of Quaternary Science, Elsevier.
Argant, J. 2004. Le gisement pliocène final de Saint-Vallier (Drôme, France): palynologie. The late pliocene site of Saint-Vallier (Drôme, France): pollen analysis. Geobios 37, 81–90.
Barbolini, N., Woutersen, A., Dupont-Nivet, G., Silvestro, D., Tardif, D., Coster, P. M. C., Meijer, N., Chang, C., Zhang, H.-X., Licht, A., Rydin, C., Koutsodendris, A., Han, F., Rohrmann, A., Liu, X.-J., Zhang, Y., Donnadieu, Y., Fluteau, F., Ladant, J.-B., Hoorn, C. 2020. Cenozoic evolution of the steppe-desert biome in Central Asia. Science Advances 6, eabb8227.
Barrón-Ortiz C.R., Theodor J.M., Arroyo-Cabrales J.A. 2014. Dietary resource partitioning in the Late Pleistocene horses from Cedral, north-central Mexico: evidence from the study of dental wear. Revista Mexicana de Ciencias Geológicas 31, 260-269.
Barrón-Ortiz, C. I., Jass, C. N., Barrón-Corvera, R., Austen, J., Theodor, J. M. 2019. Enamel hypoplasia and dental wear of North American late Pleistocene horses and bison: an assessment of nutritionally based extinction models. Paleobiology 45, 484 – 515.
Bates, M.R., Bates, C.R., Gibbard, P.L., Macphail, R.I., Owen, F.J., Parfitt, S.A., and Preece, R.C. Bates, MR, Bates, CR, Gibbard, P.L., Macphail, R.I., Owen, F.J., Parfitt, S.A., Preece, R.C., Roberts, M.B., Robinson, J.E., Whittaker, J.E., Wilkinson, K.N. 2000. Late Middle Pleistocene deposits at Norton Farm on the West Sussex coastal plain, southern England. Journal of Quaternary Science 15, …
Bellucci, L., Bona, F., Corrado, P., Magri, D., Mazzini, I., Parenti, F., Scardia, G., Sardella, R., 2014. Evidence of late Gelasian dispersal of African fauna at Coste San Giacomo (Anagni Basin, central Italy): Early Pleistocene environments and the background of early human occupation in Europe. Quaternary Science Reviews 96, 72–85.
Bernor, R.L., Kaiser, T.M., Nelson, S.V. 2004. The Oldest Ethiopian Hipparion (Equinae, Perissodactyla) from Chorora: Systematics, Paleodiet and Paleoclimate. Courier Forschungsinstitut Senckenberg 246, 213-226.
Bernor, R.L., Kaiser, T.M. 2006. Systematics and paleoecology of the earliest Pliocene equid, Eurygnathohippus hooijeri n. sp. from Langebaanweg, South Africa. Mitteilungen aus den Hamburgischen Zoologischen Museum und Institut 103, 149-185.
Bernor, R.L., Kaiser, T.M., Nelson, S.V., Rook, L. 2011. Systematics and Paleobiology of Hippotherium malpassii n. sp. (Equidae, Mammalia) from the latest Miocene of Baccinello V3 (Tuscany, Italy). Bollettino della Società Paleontologica Italiana, 50, 175-208
Bernor, R.L., Semprebon, G.M., Damuth, J. 2014. Maragheh ungulate mesowear: interpreting paleodiet and paleoecology from a diverse fauna with restricted sample sizes. Annales Zoologici Fennici 51, 201-208.
Bravo-Cuevas, V.M., Priego-Vargas, J. 2009, Dietary evaluation of a Hipparionin horses population from the Middle Miocene of Oaxaca, Southeastern Mexico: Revista Mexicana de Ciencias Geológicas 26, 356-366.
Campbell, J.B. 1977. The Upper Palaeolithic of Britain: A study of man and nature in the Late Ice Age. Oxford: Clarendon Press.
Cohen, J.E., DeSantis, L.R., Lindsey, E.L., Meachen, J.A., O’Keefe, F.R., Southon, J.R. and Binder, W.J. 2021, Dietary stability inferred from dental mesowear analysis in large ungulates from Rancho La Brea and opportunistic feeding during the late Pleistocene: Palaeogeography, Palaeoclimatology, Palaeoecology 570, 110360.
Conway, B. 1996. The stratigraphy and chronology of the Pleistocene deposits of Barnfield Pit, Swanscombe. Occasional Paper - British Museum 94, 117-136.
Corrado, P., Magri, D., 2011. A late Early Pleistocene pollen record from Fontana Ranuccio (central Italy). Journal of Quaternary Science 26, 335–344.
Eisenmann, V. 1979. La métapodes d’Equus sensu lato (Mammalia, Perissodactyla). Géobios 12, 863-886.
Field, M.H., Peglar, S.M. 2010. A palaeobotanical investigation of the sediments from the West Runton mammoth site. Quaternary International 228, 38-45.
Gibbard, P.L. 1994. Pleistocene History of the Lower Thames Valley. Cambridge University Press, Cambridge.
Harington, C. R. 2011. Quaternary cave faunas of Canada: A review of the vertebrate remains. Journal of Cave and Karst Studies. 73(3): 162–180.
Harris, A. H. 2008-2019 [accessed April 27, 2022]. Pleistocene vertebrates of southwestern USA and northwestern Mexico [Internet]. Available: https://www.utep.edu/leb/pleistnm/default.htm
Head, M.J. 1998. Pollen and dinoflagellates from the Red Crag at Walton-on-the-Naze, Essex: evidence for a mild climatic phase during the early Late Pliocene of eastern England. Geological Magazine 135, 803–817.
Hubbard, R. 1996. The palynological studies from the Waechter excavations. Occasional Paper – British Museum 94, 191-199.
Jokela, T. 2015. The high, the sharp and the rounded: paleodiet and paleoecology of Late Miocene herbivorous mammals from Greece and Iran. Master of Science Thesis, Division of Biogeoscience, Department of Geosciences and Geography, University of Helsinki.
Kaiser, T.M., Bernor, R.L. 2006. The Baltavar Hippotherium: A mixed feeding Upper Mio­cene hipparion (Equidae, Perissodactyla) from Hungary (East-Central Europe). Beitr. Paläont. 30, 241-267.
Kaiser, T. M., Franz-Odendaal, T. A. 2004. A mixed-feeding Equus species from the Middle Pleistocene of South Africa. Quaternary Research 62, 316–323.
Kolfschoten, T., van. 2000. The Eemian mammal fauna of central Europe. Geol Mijnbouw 79, 269–281.
Kuzmina, I. 1997. Equids from the North Eurasia from the Pliocene to recent days. Rosijskaya Akademia Nauk, Trudyi Zoologicheskogo Instituta 273, 224 pp.
Leroi-Gourhan, A. 1986. Pollen analysis of sediment samples from Gough's Cave, Cheddar. Proceedings - University of Bristol Spelaeological Society 17,141–144.
Marín-Leyva, A., DeMiguel, D., García-Zepeda, M.L., Ponce, J., Arroyo Cabrales, J., Schaaf, P., Alberdi, M. 2015. Dietary adaptability of Late Pleistocene Equus from West Central Mexico. Palaeogeography, Palaeoclimatology, Palaeoecology 441, 748–757.
Melcher, M., Wolf, D., Bernor, R.L. 2014. The evolution and paleodiet of the Eurygnathohippus feibeli lineage in Africa. Paläontologische Zeitschrift 88, 99-110.
Messager, E., Lordkidpanidze, D., Kvavadze, E., Ferring, C.R., Voinchet, P., 2010. Palaeoenvironmental reconstruction of Dmanisi site (Georgia) based on palaeobotanical data. Quaternary International 223-224, 20–27.
Mullenders, W.W. 1993. New palynological studies at Hoxne. In: Singer, R., Gladfelter, B.G., and Wymer, J.J. (eds.), The Lower Paleolithic Site at Hoxne, England. The University of Chicago Press, Chicago and London. pp. 150-155.
Nakaya, H., Takai, M., Fukuchi, A., Ogino, S. 2009. A preliminary report on some fossil mammals (Equidae, Perissodactyla and Hyracoidea) from the Pliocene Udunga fauna, Transbaikalia, Russia. Asian Paleoprimatology 5, 99-104.
Rivals, F., Athanassiou, A. 2009. Dietary adaptations in an ungulate community from the late Pliocene of Greece. Palaeogeography, Palaeoclimatology, Palaeoecology 265, 134–139.
Rivals, F., Julien, M.-A., Kuitems, M., van Kolfschoten, T., Serangeli, J., Drucker, D.G., Bocherens, H., and Conard, N.J. 2015. Investigation of equid paleodiet from Schöningen 13 II-4 through dental wear and isotopic analyses: archaeological implications. Journal of Human Evolution 89, 129–137.
Rivals, F., Lister, A.M. 2016. Dietary flexibility and niche partitioning of large herbivores through the Pleistocene of Britain. Quaternary Science Reviews 146, 116–133.
Roberts, M.B. 1986. Excavation of the Lower Paleolithic site at Amey’s Eartham Pit, Boxgrove, West Sussex: a preliminary report. Proceedings of the Prehistoric Society 52, 215–245.
Roger, S., Coulon, C., Thouveny, N., Féraud, G., Van Velzen, A., Fauquette, S., Cochemé, J.J., Prévot, M., Verosub, K.L., 2000. 40Ar/39Ar dating of a tephra layer in the Pliocene Senèze maar lacustrine sequence (French Massif Central): constraint on the age of the Réunion–Matuyama transition and implications on paleoenvironmental archives. Earth and Planetary Science Letters 183, 431–440.
Saarinen, J., Eronen, J., Fortelius, M., Seppä, H., Lister, A.M. 2016. Patterns of diet and body mass of large ungulates from the Pleistocene of Western Europe, and their relation to vegetation. Palaeontologia Electronica, 19.3.32A, 1-58.
Saarinen, J., Cirilli, O., Strani, F., Meshida, K., Bernor, R. 2021a. Testing equid body mass estimate equations on modern zebras – with implications to understanding the relationship of body size, diet and habitats of Equus in the Pleistocene of Europe. Frontiers in Ecology and Evolution 9, 622412.
Saarinen, J., Oksanen, O., Zliobaite, I., Fortelius, M., DeMiguel, D., Azanza, B., Bocherens, H., Luzón, C., Solano-García, J., Yravedra, J., Courtenay, L.A., Blain, H.-A., Sánchez-Bandera, C., Serrano-Ramos, A., Rodriguez-Alba, J.J., Viranta, S., Barsky, D., Tallavaara, M., Oms, O., Agustí, J., Ochando, J., Carrion, J.S., Jiménez-Arenas, J.M. 2021b. Pliocene to Middle Pleistocene climate history…
Schreve, D.S. 1997. Mammalian biostratigraphy of the late Middle Pleistocene in Britain. PhD thesis, University of London, London, UK.
Schulz, E., Kaiser, T.M. 2013. Historical distribution, habitat requirements and feeding ecology of the genus Equus (Perissodactyla). Mammal Review 43, 111–123.
Strani, F., Pushkina, D., Bocherens, H., Bellucci, L., Sardella, R., DeMiguel, D. 2019. Dietary adaptations of Early and Middle Pleistocene equids from the Anagni basin (Frosinone, central Italy). Frontiers in Ecology and Evolution 7, 176.
Strani, F. 2020. Impact of Early and Middle Pleistocene major climatic events on the palaeoecology of Southern European ungulates. Historical Biology, 1-16.
Strani F., Bellucci L., Iannucci A., Iurino D.A., Mecozzi B., Sardella R. 2022. Palaeoenvironments of the MIS 15 site of Cava di Breccia - Casal Selce 2 (central Italian Peninsula) and niche occupation of fossil ungulates during Middle Pleistocene interglacials. Historical Biology. 34(3), 555-565
Urban, B. 1992. “Die Rolle der Quartärbotanik und ihre Bedeutung für die Fundstelle des Homo erectus heidelbergensis von Mauer” in Schichten von Mauer – 85 Jahre Homo erectus heidelbergensis eds K.W. Beinhauer, and G.A. Wagner (Edition Braus, Reiss-Museum der Stadt Mannheim), 111–119.
Urban, B., Bigga, G. 2015. Environmental reconstruction and biostratigraphy of late Middle Pleistocene lakeshore deposits at Schöningen. Journal of Human Evolution 89, 57–70. https ://doi.org/10.1016/j. jhevol.2015.10.002
van Asperen, E. N., Stefaniak, K., Proskurnyak, I., Ridush, B., 2012. Equids from Emine-Bair-Khosar Cave (Crimea, Ukraine): co-occurrence of the stenonid Equus hydruntinus and the caballoid E. ferus latipes based on skull and postcranial remains. Palaeontologia Electronica 15, 5A.
Weinstock, J., Willerslev, E., Sher, A., Tong, W., Ho, S.Y.W., Rubenstein, D., Storer, J., Burns, J., Martin, L., Bravi, C., Prieto, A., Froese, D., Scott, E., Xulong, L., Cooper, A. 2005. Evolution, Systematics, and Phylogeography of Pleistocene Horses in the New World: A Molecular Perspective. PLoS Biology 3, e241.
West, R.G., Lambert, C.A., Sparks, B.W., Dickson, J.H. 1964. Interglacial deposits at Ilford, Essex. Philosophical Transactions of the Royal Society B 247, 185–212.
Willoughby, D.P. 1948. A statistical study of the metapodials of Equus occidentalis Leidy. Bulletin of the Southern California Academy of Sciences XLVII (3), 84-94.
Wolf, D., Nelson, S.V., Schwartz, H.L., Semprebon, G.M., Kaiser, T.M., Bernor, R.L. 2010. Taxonomy and paleoecology of the Pleistocene Equidae from Makuyuni, Northern Tanzania. Palaeodiversity 3, 249-269.
Wolf, D., Bernor, R.L., Hussain, S.T. 2013. A systematic, biostratigraphic, and paleobiogeographic reevaluation of the Siwalik hipparionine horse assemblage from the Potwar Plateau, Northern Pakistan. Paleontographica, Abt. A 300, 1-115.
Zalasiewicz, J.A., Mathers, S.J., Hughesm, M.J., Gibbard, P.L., Peglar, S.M., Harlandm R., Nicholson, R.A., Boulton, G.S., Cambridge, P., Wealthall, G.P. 1988. Stratigraphy and Palaeoenvironments of the Red Crag and Norwich Crag Formations between Aldeburgh and Sizewell, Suffolk, England. Philosophical Transactions of the Royal Society of London, Series B 322, 221–272.
Zhao, Y., Herzschuh, U. 2009. Modern pollen representation of source vegetation in the Qaidam Basin and surrounding mountains, northeastern Tibetan Plateau. Vegetation History and Archaeobotany 18, 245-60.
Ziegler, R. 1996. Die Grosssäuger aus der Frühwürmzeitlichen Fauna von der Villa Seckendorff in Stuttgart- Bad Cannstatt. Stuttgarter Beiträge zur Naturkunde, serie B (Geologie und Paläontologie) 237, 1-63.

## Sheet: Europe
Genus	Species	Sp.	Locality	Continent	Country	Basis for age estimate	Age (Ma) (mean of estimate)	n (BM)	Body mass (kg)	n (MW)	High	Low	Sharp	Round	Blunt	PERHIGH	PERLOW	PERSHARP	PERROUND	PERBLUNT	MW score (Saarinen et al., 2016)	Diet (inferred from Saarinen MW score)	Body size class	Reference (MW)	Locality NPP estimate	Locality mean NAP%	Locality mean Graminae%	Pollen ref.	n (MICRO)	AP	AS	%Lp	%G	%XS	SWS	%0-17	Diet (inferred from MICROWEAR Strani)	Reference MICROWEAR
Equus	ferus	Equus ferus	Gough's Cave	Europe	UK	MIS2	0.022	4	374.11	9	1	8	3	3	3	11.1111	88.8889	33.3333	33.3333	33.3333	2.38889	grazer	small	Saarinen et al. 2016	682.667	91.66	11.244	Leroi-Gourhan 1986	25	14.5	25.7	20	25	12	0.7	0	grazer	Rivals and Lister 2016
Equus	ferus	Equus ferus	Kent's Cavern	Europe	UK	MIS3	0.04	27	487.048	23	2	21	3	16	4	8.69565	91.3043	13.0435	69.5652	17.3913	2.43478	grazer	large	Saarinen et al. 2016	706.667	64	23	Campbell 1077	23	13.8	19	21.7	17.4	17.4	1.1	21.7	grazer	Rivals and Lister 2016
Equus	hydruntinus	Equus hydruntinus	Emine Bair Khosar Cave	Europe	Ukraine	MIS3	0.04	mean	234.36	2	0	2	0	1	1	0	100	0	50	50	2.75	grazer	small	Saarinen (new), based on data in van Asperen et al. 2012
Equus	ferus	Equus ferus	Aufhausener höhle	Europe	Germany	Weichselian	0.062	6	475.737	9	0	9	5	3	1	0	100	55.5556	33.3333	11.1111	2.27778	grazer	large	Saarinen et al. 2016
Equus	ferus	Equus ferus	Lampertheim in der Tanne (Oberrhein)	Europe	Germany	Weichselian	0.062	6	413.549														medium
Equus	ferus	Equus ferus	Villa Seckendorff	Europe	Germany	late MIS5	0.096	93	510.576	23	2	21	3	15	5	8.7	91.3	13	65.2	21.8	2.45652	grazer	large	Saarinen et al. 2016	632.545
Equus	hydruntinus	Equus hydruntinus	Villa Seckendorff	Europe	Germany	late MIS5	0.096	9	251.083	4	1	3	1	1	2	25	75	25	25	50	2.375	grazer	small	Saarinen (new)	632.545
Equus	ferus	Equus ferus	Taubach	Europe	Germany	MIS5e	0.116	8	531.62	8	2	6	2	4	2	25	75	25	50	25	2.25	grazer	large	Saarinen et al. 2016	934.5
Equus	ferus	Equus ferus	Brighton	Europe	UK	early MIS6	0.175	5	299.994	7	0	7	0	5	2	0	100	0	71.4	28.6	2.64286	grazer	small	Saarinen (new)	761.429	81	20	Bates 2000
Equus	ferus	Equus ferus	Crayford	Europe	UK	late MIS7	0.2	32	534.445	8	2	6	0	7	1	25	75	0	87.5	12.5	2.3125	grazer	large	Saarinen et al. 2016	972.545				19	23.5	20.9	31.6	5.3	0	1.2	15.8	grazer	Rivals and Lister 2016
Equus	ferus	Equus ferus	Brundon	Europe	UK	MIS7	0.217	17	548.647	10	2	8	0	8	2	20	80	0	80	20	2.4	grazer	large	Saarinen et al. 2016	955.375				19	20.8	16.9	47.4	0	5.3	1.2	42.1	mixed	Rivals and Lister 2016
Equus	ferus	Equus ferus	Ilford	Europe	UK	MIS7	0.217	23	573.28	6	2	4	2	3	1	33.3333	66.6667	33.3333	50	16.6667	2.08333	grass-dom.	very large	Saarinen et al. 2016	955.375	44.5625	15.6667	West 1964	21	16.6	19.4	28.6	28.6	0	1.3	19	grazer	Rivals and Lister 2016
Equus	mosbachensis	Equus mosbachensis	Schöningen	Europe	Germany	MIS9	0.32	36	573.958	2	2	0	1	1	0	100	0	50	50	0	1.25	browse-dom.	very large	Saarinen (new)	886.5	19.3125	6.73333	Urban and Bigga 2015	71	158.8	118	43.6		4.2	1.09		browse-dom.	Rivals et al. 2015
Equus	ferus	Equus ferus	Grays Thurrock	Europe	UK	MIS9	0.32	1	530.649	7	1	6	3	4	0	14.3	85.6	42.9	57.1	0	2.14286	grass-dom.	large	Saarinen (new)	992.273	19.2	13.7	Gibbard 1994	17	19.1	18.1	76.5	58.8	0	1.6	23.5	grass-dom./mixed	Rivals and Lister 2016
Equus	ferus	Equus ferus	Frankenbacher sande	Europe	Germany	MIS11	0.4	10	589.106														very large
Equus	ferus	Equus ferus	Hoxne	Europe	UK	MIS11	0.4	3	472.782	10	4	6	2	8	0	40	60	20	80	0	2	grass-dom.	large	Saarinen et al. 2016	978.444	23.5489		Mullenders 1992	7	26.9	21.9	14.3	0	0	1.1	0	grass-dom.	Rivals and Lister 2016
Equus	ferus	Equus ferus	Steinheim a.d. Murr, grube Sammet	Europe	Germany	MIS11	0.4	28	511.374	22	3	19	2	14	6	13.6364	86.3636	9.09091	63.6364	27.2727	2.45455	grazer	large	Saarinen et al. 2016
Equus	ferus	Equus ferus	Steinheim a.d. Murr, grube Sigrist	Europe	Germany	MIS11	0.4	7	525.231														large		1004
Equus	ferus	Equus ferus	Swanscombe	Europe	UK	MIS11	0.4	5	504.752	7	2	5	0	6	1	28.5714	71.4286	0	85.7143	14.2857	2.28571	grazer	large	Saarinen et al. 2016	1162.27	31.6136	14.5	Conway 1996, Hubbard 1996	2	20.8	21.8	50	0	0	1		grazer	Rivals and Lister 2016
Equus	mosbachensis?	Equus cf. mosbachensis	Fontana Ranuccio	Europe	Italy	MIS11	0.4	6	408.359	10	0	10	3	5	2	0	100	30	50	20	2.45	grazer	medium	Strani 2019		13.9583		Corrado and Magri 2011
Equus	mosbachensis	Equus mosbachensis	Caune d'Arago	Europe	France	MIS12	0.45	6	524.23	118	25	93	22	62	30	79	21	19	54	26	2.28814	grazer	large	Kaiser and Franz-Odendaal 2004
Equus	mosbachensis	Equus mosbachensis	Boxgrove	Europe	UK	MIS13	0.5	1*	562.208	2	2	0	1	1	0	100	0	50	50	0	1.25	browse-dom.	very large	Saarinen (new)	1032.8	8.5		Roberts 1986	7	19.1	17.6	57.1	0	28.6	1.3	42.9	mixed	Rivals and Lister 2016
Equus	mosbachensis	Equus mosbachensis	Mauer	Europe	Germany	MIS15	0.6	14	578.907	7	2	5	2	5	0	28.5714	71.4286	28.5714	71.4286	0	2.07143	grass-dom.	very large		1332.27	25.6895	13.4231	Urban 1992
Equus	mosbachensis	Equus mosbachensis	Mosbach	Europe	Germany	MIS15	0.6	18	580.816	5	2	3	3	2	0	40	60	60	40	0	1.8	mixed	very large	Saarinen (new)	1191
Equus	mosbachensis?	Equus cf. mosbachensis	Cava di Breccia - Casal Selce 2	Europe	Italy	MIS15	0.6			7	0	7	0	1	6	0	100	0	14.3	85.7	2.92857	grazer		Strani et al 2021
Equus	ferus?	Equus cf. ferus	Vallparadis Estacio EVT3	Europe	Spain	MIS15	0.6			12	3	9	1	8	3	25	75	8.33333	66.6667	25	2.33333	grazer		Strani 2019					2	8	16.5	0	0	0	0	50	mixed feeder	Strani 2019
Equus	altidens?	Equus altidens?	Trimingham	Europe	UK	Cromerian? MIS15?	0.6	1	355.523	4	1	3	0	4	0	25	75	0	100	0	2.25	grazer	small	Saarinen (new)
Equus	altidens	Equus altidens	Süssenborn	Europe	Germany	MIS16	0.65	22	360.934	20	7	13	2	17	1	35	65	10	85	5	2.125	grass-dom.	small	Saarinen (new)	766.643
Equus	suessenbornensis	Equus suessenbornensis	Süssenborn	Europe	Germany	MIS16	0.65	27	570.788	14	9	5	5	7	2	64.29	35.71	35.71	50	14.29	1.75	mixed	very large	Saarinen (new)	766.643
Equus	suessenbornensis	Equus suessenbornensis	West Runton	Europe	UK	MIS17	0.7	2	539.864	2	1	1	2	0	0	50	50	100	0	0	1.5	mixed	large	Saarinen (new)	844.583	44.6	32.8	Field and Peglar 2010
Equus	altidens	Equus altidens	West Runton	Europe	UK	MIS17	0.7			3	1	2	1	2	0	33.3	66.7	33.3	66.7	0	2	grass-dom.	small	Saarinen (new)	844.583	44.6	32.8	Field and Peglar 2010	3	18	17.5	0	0	0.7	0	66.7	mixed	Rivals and Lister 2016
Equus	suessenbornensis	Equus suessenbornensis	Cullar Baza	Europe	Spain		0.7	2	549.029	18	9	9	10	8	0	50	50	56	44	0	1.72222	mixed	very large	Saarinen (new)
Equus	altidens	Equus altidens	Vallparadis Estacio EVT7	Europe	Spain	MIS21	0.858			22	5	17	1	17	4	22.7273	77.2727	4.54545	77.2727	18.1818	2.34091	grazer		Strani 2019					7	12.5714	18.7143	28.5714	0	42.8571	0	42.8571	mixed feeder	Strani 2019
Equus	altidens	Equus altidens	Vallparadis Estacio EVT12	Europe	Spain	MIS31	1	5	373.54	8	2	6	0	6	2	25	75	0	75	25	2.375	grazer		Strani 2019	1297.12	26.5			5	8.6	22	40	20	40	0.2	0	grazer	Strani 2019
Equus	suessenbornensis	Equus suessenbornensis	Akhalkalaki	Europe	Georgia		1	129	631.091	9	5	4	4	5	0	55.6	44.4	44.5	55.6	0	1.72222	mixed	very large		852.9
Equus	apolloniensis	Equus stenonis	Apollonia	Europe	Greece		1.15	12	427.174	3	0	3	0	1	2	0	100	0	33.3	66.7	2.83333	grazer	medium		560.636
Equus	stenonis	Equus stenonis	Sainzelles	Europe	France		1.3	3	470.778														large		1222.17
Equus	altidens	Equus altidens	Fuente Nueva 3	Europe	Spain		1.3	3	383.522	14	5	9	7	7	0	35.7143	64.2857	50	50	0	1.89286	grass-dom.	small	Saarinen et al. 2021	914.444
Equus	suessenbornensis	Equus suessenbornensis	Fuente Nueva 3	Europe	Spain		1.3	2	615.563	4	3	1	4	0	0	75	25	100	0	0	1.25	browse-dom.	very large	Saarinen et al. 2021	914.444
Equus	altidens	Equus altidens	Barranco León	Europe	Spain		1.4			8	2	6	3	5	0	25	75	37.5	62.5	0	2.0625	grass-dom.	small	Saarinen et al. 2021	914.444
Equus	suessenbornensis	Equus suessenbornensis	Barranco León	Europe	Spain		1.4	1	753.356	4	4	0	4	0	0	100	0	100	0	0	1	browse-dom.	very large	Saarinen et al. 2021	914.444
Equus	altidens	Equus altidens	Pirro Nord	Europe	Italy		1.45	72	337.883	2	0	2	0	1	1	0	100	0	50	50	2.75	grazer	small	Saarinen (new)	843.714
Equus	altidens	Equus altidens	Venta Micena	Europe	Spain		1.5	12	362.267	20	3	17	5	13	2	15	85	25	65	10	2.275	grazer	small	Saarinen et al. 2021	766.583
Equus	major	Equus major	East Runton	Europe	UK	Pastonian?	1.75	6	714.982	2	2	0	0	2	0	100	0	0	100	0	1.5	mixed	very large	Saarinen (new)	752.3				3	27.7	15.5	0	0	0	1	66.7	browse-dom./mixed	Rivals and Lister 2016
Equus	stenonis	Equus stenonis	East Runton	Europe	UK	Pastonian?	1.75	1	512.011	2	1	1	1	1	0	50	50	50	50	0	1.75	mixed	large	Saarinen (new)	752.3
Equus	stehlini	Equus stehlini	Casa Frata (Upper Valdarno Basin)	Europe	Italy		1.8	66	293.625														small		946.444
Equus	stenonis mygdoniensis	Equus mygdoniensis	Mygdona Basin	Europe	Greece		1.8	18	303.202														small	Saarinen (new)
Equus	stenonis	Equus stenonis	Dmanisi	Europe	Georgia		1.81	3	473.759	4	2	2	0	4	0	50	50	0	100	0	2	grass-dom.	large	Saarinen (new)	705.294	32		Messager et al. 2010
Equus	altidens	Equus altidens	Dmanisi	Europe	Georgia		1.81	3	305.834	2	0	2	1	0	1	0	100	50	0	50	2.5	grazer	small	Saarinen (new)	705.294	32		Messager et al. 2010
Equus	major	Equus major	Norwich Crag	Europe	UK	Pre-Pastonian	1.85	1	639.669	4	4	0	3	1	0	100	0	75	25	0	1.125	browse-dom.	very large	Saarinen (new)	907.273
Equus	stenonis	Equus stenonis	Matassino Poggiorosso (Upper Valdarno Basin)	Europe	Italy		1.85	20	410.485														medium		1131.43
Equus	stenonis	Equus stenonis	Matassino Solava (Upper Valdarno Basin)	Europe	Italy		1.85	43	446.922														medium
Equus	stenonis	Equus stenonis	Olivola	Europe	Italy		1.95	105	442.267	5	0	5	0	2	3	4.8	95.2	28.6	38.1	28.6	2.8	grazer	medium	Strani 2019	924.9
Equus	stenonis	Equus stenonis	Puebla de Valverde	Europe	Spain		2	3	421.866	6	0	6	1	3	2	0	100	16.7	50	33.3	2.58333	grazer	medium	Saarinen (new)	988.417
Equus	stenonis	Equus stenonis	Sesklo	Europe	Greece		2	6	437.267													grazer	medium	Rivals and Athanassiou 2009	642.154				9	17.67	24.72	10	22.2	0	1.1	0	grazer	Rivals and Athanassiou 2008
Equus	stenonis	Equus stenonis	Volax	Europe	Greece		2	3	474.398														large		534.545
Equus	cf. stenonis	Equus stenonis	Vatera	Europe	Greece		2.1	3	419.787														medium
Equus	major	Equus major	Senèze	Europe	France		2.1	5	688.397														very large		910.5	40		Roger et al. 2000
Equus	senezensis	Equus senezensis	Senèze	Europe	France		2.1	52	327.047	5	0	5	2	2	1	0	100	40	40	20	2.4	grazer	small	Saarinen (new)	910.5	40		Roger et al. 2000
Equus	senezensis	Equus senezensis	Coste San Giacomo	Europe	Italy		2.1	15	376.883	20	5	15	7	9	4	25	75	35	45	20	2.175	grass-dom.	medium	Strani 2019	1234.15	39		Bellucci et al. 2013
Equus	major	Equus major	Tegelen	Europe	Netherlands		2.3	2	590.437	1	1	0	1	0	0	100	0	100	0	0	1	browse-dom.	very large	Saarinen (new)	1439.71
Equus	cf. major	Equus major	Pardines	Europe	France		2.3	1	633.374														very large		723.5
Equus	stenonis	Equus stenonis	Perrier	Europe	France		2.3	2	523.379														large
Equus	stenonis guthi	Equus stenonis	Chilhac	Europe	France		2.3	18	395.927														medium		946.444
Equus	stenonis	Equus stenonis	Dafnero	Europe	Greece		2.35	3	485.64														large		634.778
Equus	stenonis	Equus stenonis	Saint Vallier	Europe	France		2.4	168	456.607	4	0	4	0	4	0	0	100	0	100	0	2.5	grazer	medium	Saarinen (new)	1013.6	30.5943	9.2675	Argant 2004
Equus	major	Equus major	Red Crag	Europe	Europe	Pre-Ludhamian	2.5	2	618.6	2	2	0	1	1	0	100	0	50	50	0	1.25	browse-dom.	very large	Saarinen (new)	1152	28.0952	6.59091	Zalasiewich et al. 1988
Equus	cf. major	Equus major	Montopoli	Europe	Italy		2.5	1	601.275														very large		1090.33
Equus	livenzovensis	Equus livenzovensis	Livenzovka	Europe	Russia		2.5	4	503.082														large		798.611
Equus	livenzovensis	Equus livenzovensis	El-Rincon 1	Europe	Spain		2.6	33	502.899														large
Proboscidipparion	sp.	Proboscidipparion sp.	Red Crag	Europe	UK	Late Pliocene	2.7		260.167							100	0	0	100	0	1.5	mixed	large	Rivals and Lister 2016, Saarinen this wolume	1370.9	9.41046	0.573248	Head 1998	11	31.1	13.7	54.5	18.2	72.2	1.1	90.9	browse-dom.	Rivals and Lister 2016
Cremohipparion	periafricanum	Cremohipparion periafricanum	Valdecebro	Europe	Spain	MN 13	6.2		71.9402							0	100	0	80	20	2.6	grazer	small	Saarinen, this wolume
Hippotherium	malpassi	Hippotherium malpassi	several localities	Europe	Italy	MN 12 - MN 13	6.35		196.413							81.71	18.29	21.19	78.81	0	1.57695	grass-dom.	medium	Bernor et al. 2011
Hipparionini	indet.	Hipparionini indet.	Samos	Europe	Greece	MN 12 - MN 13	6.35									60	40	0	100	0	1.9	grass-dom.		Jokela 2015
Hipparionini	indet.	Hipparionini indet.	Pikermi	Europe	Greece	MN12	7.35									71.4	28.6	0	100	0	1.786	grass-dom.		Jokela 2015
Cremohipparion	moldavicum	Cremohipparion moldavicum	Maragheh	Europe	Iran	MN 12	7.35		149.446							100	0	33.33	66.67	0	1.33335	mixed	medium	Bernor et al. 2014
Cremohipparion	matthewi	Cremohipparion matthewi	Maragheh	Europe	Iran	MN 12	7.35		107.579							0	100	0	100	0	2.5	grazer	small	Bernor et al. 2014
Hipparion	prostylum	Hipparion prostylum	Maragheh	Europe	Iran	MN 12	7.35		152.344							100	0	0	100	0	1.5	mixed	medium	Bernor et al. 2014
Hipparion	dietrichi	Hipparion dietrichi	Maragheh	Europe	Iran	MN 12	7.35		194.957							100	0	0	100	0	1.5	mixed	medium	Bernor et al. 2014
Hipparion	campbelli	Hipparion campbelli	Maragheh	Europe	Iran	MN 12	7.35		204.016							100	0	0	100	0	1.5	mixed	medium	Bernor et al. 2014
Hippotherium	microdon	Hippotherium microdon	Baltavar	Europe	Hungary	MN 12	7.35		188.411							100	0	29.8	70.2	0	1.351	mixed	medium	Kaiser and Bernor 2006
Hippotherium	kammerschmittae	Hippotherium kammerschmittae	Dorn-Dürkheim	Europe	Germany	MN 11	8.25		190							93	7	88	13	0	1.14	browse-dom.	medium	Kaiser and Bernor 2006
Hippotherium	aff. primigenium	Hippotherium aff. primigenium	Dorn-Dürkheim	Europe	Germany	MN 11	8.25		212.721							96.7	3.3	56.2	43.8	0	1.252	browse-dom.	large	Kaiser and Bernor 2006
Hippotherium	sumegense	Hippotherium sumegense	Sümeg	Europe	Hungary	MN 9 - MN 10	10.05		210.884							100	0	50	50	0	1.25	browse-dom.	large	Kaiser and Bernor 2006
Hippotherium	primigenium	Hippotherium primigenium	Eppelsheim	Europe	Germany	MN 9	10.55		247.198							96.6	3.4	15.7	84.3	0	1.456	mixed	large	Kaiser and Bernor 2006

## Sheet: Africa
Genus	Species	Sp.	Locality	Continent	Country	Basis for age estimate	Age (Ma) (mean of estimate)	n (BM)	Body mass (kg)	n (MW)	High	Low	Sharp	Round	Blunt	PERHIGH	PERLOW	PERSHARP	PERROUND	PERBLUNT	MW score (Saarinen et al., 2016)	Diet (inferred from Saarinen MW score)	Body size class	Reference (MW)	Locality NPP estimate	Locality mean NAP%	Locality mean Graminae%	Pollen ref.	n (MICRO)	AP	AS	%Lp	%G	%XS	SWS	%0-17	Diet (inferred from MICROWEAR Strani)	Reference MICROWEAR
Equus	africanus	Equus africanus	modern East Africa	Africa	not specified	present	0	14	247.364	8	2	6	2	2	4	25	75	25	25	50	2.375	grazer	small	Schulz and Kaiser 2011, Saarinen (new)
Equus	guagga	Equus quagga	modern Africa	Africa	not specified	present	0	20	288.356	10	0	10	1	3	6	0	100	10	30	60	2.75	grazer	small	Saarinen (new)					51	72	135.8	49		60	1.1		grazer	Rivals et al. 2015
Equus	grevyi	Equus grevyi	modern East Africa	Africa	not specified	present	0	36	360.795	9	0	9	2	2	5	0	100	22.2	22.2	55.6	2.66667	grazer	small	Saarinen (new)					15	49.1	163.1	63.6		66.7	1.33		grazer	Rivals et al. 2015
Equus	zebra	Equus zebra	modern South Africa	Africa	not specified	present	0	6	291.254	13	4	9	2	4	7	31.4	68.6	12.9	30.6	56.5	2.38462	grazer	small	Schulz and Kaiser 2011, Saarinen (new)
Equus	capensis	Equus capensis	Elandsfontein	Africa	South Africa		0.45	1	653.197	14	10	4	4	5	1	71	29	40	50	10	1.39286	mixed	very large	Kaiser and Franz-Odendaal 2004
Equus	mauritanicus	Equus mauritanicus	Ternifine	Africa	Algeria		0.7	74	358.764														small	Saarinen (new)
Equus	oldowayensis	Equus oldowayensis	TKII/OLD63	Africa	Tanzania		1.47	54	415.126														medium	Saarinen (new)
Eurygnathohippus	sp.	Eurygnathohippus sp.	Makuyuni	Africa	Tanzania	Early Pleistocene	1.47		258.71							12.5	87.5	0	37.5	62.5	2.6875	grazer	large	Wolf et al. 2010
Equus	tabeti	Equus tabeti	Ain Hanech	Africa	Algeria		1.87	39	260.522														small	Saarinen (new)
Equus	koobiforensis	Equus koobiforensis	Koobi Fora	Africa	Kenya		2.1	9	343.128	3	0	3	0	2	1	0	100	0	66.7	33.3	2.66667	grazer	small	Saarinen (new)
Equus	numidicus	Equus numidicus	Ain Boucherit	Africa	Algeria		2.44	10	344.843	4	0	4	0	3	1	0	100	0	75	25	2.625	g	small	Saarinen (new)
Eurygnathohippus	hooijeri	Eurygnathohippus hooijeri	Langebaanweg	Africa	South Africa	Early Pliocene	4		247.834							50	50	23	55	23	2.01	grass-dom.	large	Bernor and Kaiser 2006
Eurygnathohippus	woldegabrieli	Eurygnathohippus woldegabrieli	Aramis	Africa	Ethiopia	Early Pliocene	4.4		260.04							38	62	1	57	42	2.325	grazer	large	Bernor et al. 2013
Eurygnathohippus	feibeli	Eurygnathohippus feibeli	several localities	Africa	Kenya/Ethiopia	Late Miocene	6		218.616							72.78	27.22	0	96.67	3.33	1.78885	grass-dom.	large	Melcher et al. 2014
"Cormohipparion"	sp.	"Cormohipparion" sp.	Chorora	Africa	Ethiopia	8.5 Ma	8.5		160							100	0	49.6	50.4	0	1.252	browse-dom.	medium	Bernor et al. 2004

## Sheet: Asia
Genus	Species	Sp.	Locality	Continent	Country	Basis for age estimate	Age (Ma) (mean of estimate)	n (BM)	Body mass (kg)	n (MW)	High	Low	Sharp	Round	Blunt	PERHIGH	PERLOW	PERSHARP	PERROUND	PERBLUNT	MW score (Saarinen et al., 2016)	Diet (inferred from Saarinen MW score)	Body size class	Reference (MW)	Locality NPP estimate	Locality mean NAP%	Locality mean Graminae%	Pollen ref.	n (MICRO)	AP	AS	%Lp	%G	%XS	SWS	%0-17	Diet (inferred from MICROWEAR Strani)	Reference MICROWEAR
Equus	hemionus	Equus hemionus	Central Asia	Asia	not specified	present	0	mean (Eisenmann 1979) + 2	199.876	5	0	5	2	0	3	0	100	20	0	80	2.6	grazer	small	Saarinen (new)	567.6	66.7381	21.0698	Andreev and Tarasov 2007 for Holocene Kazakhstan steppe sampled from Ozerki swamp
Equus	kiang	Equus kiang	Tibet	Asia	not specified	present	0	2	231.404	3	0	3	1	1	1	0	100	33.3	33.3	33.3	2.5	grazer	small	Saarinen (new)	335	100	27.25	Zhao and Herzug 2009, from modern Qaidam Basin surface samples
Equus	przewalski	Equus przewalski	Central Asia	Asia	not specified	present	0	mean (Eisenmann 1979)	312.894	15	9	6	1	2	12	58.1	41.9	9.3	11.6	79.1	2.26667	grazer	small	Schulz and Kaiser 2011, Saarinen (new)	347	92.3	21.44	Barbolini et al. 2020 for late Quaternary of Central Asia
Equus	ferus (lenensis)	Equus ferus (lenensis)	Yakutia	Asia	Russia	Late Pleistocene - Holocene		several (Kuzmina 1997)	363.418	9	2	7	2	4	3	22.2	77.8	22.2	44.4	33.3	2.33333	grazer	small	Pushkina and Saarinen (new)
Equus	ferus (latipes)	Equus ferus (latipes)	Kostenki 14	Europe	Russia	MIS3	0.04	several (Kuzmina 1997)	507.053	5	1	4	1	2	2	20	80	20	40	40	2.4	grazer		Pushkina and Saarinen (new)
Equus	nalaikhaensis	Equus nalaikhaensis	Nalaikha	Asia	Siberia		1	19	398.901														medium
Equus	eisenmannae	Equus eisenmannae	Longdan	Asia	China		2.55	189	491.607	5	0	5	0	3	2	0	100	0	60	40	2.7	grazer	large	Saarinen (new)
Baryhipparion	tchicoicum	Baryhipparion tchicoicum	Udunga	Asia	Russia	Pliocene (3.4 - 3 Ma)	3.2		150.979							75	25	50	25	25	1.625	grass-dom.	medium	Nakaya et al. 2009
Hipparionini	sp. Unit 4	Hipparionini sp. Unit 4	Siwaliks	Asia	Pakistan	7.69 - 6.2 Ma	6.95									100	0	0	100	0	1.5	mixed		Wolf et al. 2013
Hipparionini	sp. Unit 3	Hipparionini sp. Unit 3	Siwaliks	Asia	Pakistan	8.69 - 7.7 Ma	8.2									93.1	6.9	3.45	89.66	6.9	1.58635	grass-dom.		Wolf et al. 2013
Hipparionini	sp. Unit 2	Hipparionini sp. Unit 2	Siwaliks	Asia	Pakistan	MN 10 (9.69 - 8.7 Ma)	9.2									94.59	5.41	2.7	94.59	2.7	1.554	grass-dom.		Wolf et al. 2013
Hipparionini	sp. Unit 1	Hipparionini sp. Unit 1	Siwaliks	Asia	Pakistan	MN 9 (10.7 - 9.7 Ma)	10.2									100	0	14.29	85.71	0	1.42855	mixed		Wolf et al. 2013
Equus	verae (coliemensis)	Equus verae (coliemensis)						several (Kuzmina 1997)	590.544
Equus	uralensis	Equus uralensis						several (Kuzmina 1997)	412.453
Equus	gmelini (steppe)	Equus gmelini (steppe)						several (Kuzmina 1997)	305.156

## Sheet: North America and Mexico
Genus	Species	Sp.	Locality	Continent	Country	Basis for age estimate	Age (Ma) (mean of estimate)	n (BM)	Body mass (kg)	n (MW)	High	Low	Sharp	Round	Blunt	PERHIGH	PERLOW	PERSHARP	PERROUND	PERBLUNT	MW score (Saarinen et al., 2016)	Diet (inferred from Saarinen MW score)	Body size class	Reference (MW)	Locality NPP estimate
Equus	simplicidens	Equus simplicidens	Hagerman H.Q.	North America	USA		3.5	51	330.107	13	0	13	0	8	5	0	100	0	0.615	0.385	2.69231	grazer	small	Saarinen (new)
Equus	cedralensis	Equus cedralensis	Cedral	North America	Mexico			8	138.41	26	1	25	3	14	9	3.84615	96.1538	11.5385	53.8462	34.6154	2.57692	grazer	small	Barrón-Ortiz et al. 2014	670.667
Equus	conversidens	Equus conversidens	Cedral	North America	Mexico			2	249.08	24	1	23	8	10	6	4.16667	95.8333	33.3333	41.6667	25	2.41667	grazer	small	Barrón-Ortiz et al. 2014	670.667
Equus	mexicanus	Equus mexicanus	Cedral	North America	Mexico			10	456.23	25	2	23	3	21	1	8	92	12	84	4	2.38	grazer	large	Barrón-Ortiz et al. 2014	670.667
Equus	cedralensis	Equus cedralensis	La Cinta-Portalitos	North America	Mexico			7	145.5	37	21	16	9	23	5	56.8	43.2	24.3	62.2	13.5	1.87838	grass-dom.	small	Marín-Leyva et al., 2016a	730.6
Equus	conversidens	Equus conversidens	La Cinta-Portalitos	North America	Mexico			2	344.7	56	16	40	12	38	6	28.6	71.4	21.4	67.9	10.7	2.16071	grazer	small	Marín-Leyva et al., 2016a	730.6
Equus	mexicanus	Equus mexicanus	La Cinta-Portalitos	North America	Mexico					13	1	12	3	5	5	7.7	92.3	23.1	38.5	38.5	2.5	grazer		Marín-Leyva et al., 2016a	730.6
Equus	cedralensis	Equus cedralensis	La Piedad-Santa Ana	North America	Mexico			3	126	19	4	15	3	15	1	21	78.9	15.8	78.9	5.3	2.23684	grass-dom.	small	Marín-Leyva et al., 2016a
Equus	conversidens	Equus conversidens	La Piedad-Santa Ana	North America	Mexico			7	297.3	20	0	20	3	13	4	0	100	15	65	20	2.525	grazer	small	Marín-Leyva et al., 2016a
Equus	mexicanus	Equus mexicanus	La Piedad-Santa Ana	North America	Mexico			1	476.7	15	2	13	3	10	2	13.3	86.7	20	66.7	13.3	2.33333	grazer	large	Marín-Leyva et al., 2016a
Equus	conversidens	Equus conversidens	Dark Canyon Cave	North America	USA					8	0	8	0	5	3	0	100	0	62.5	37.5	2.6875	grazer		Barrón-Ortiz et al. 2019	706.667
Equus	conversidens	Equus conversidens	Dry Cave (LGM)	North America	USA			9	297.137	2	0	2	0	1	1	0	100	0	50	50	2.75	grazer	small	Barrón-Ortiz et al. 2019	299
Equus	conversidens	Equus conversidens	Dry Cave (Post-LGM)	North America	USA			9	297.137	4	1	3	1	3	0	25	75	25	75	0	2.125	grass-dom.	small	Barrón-Ortiz et al. 2019	299
Equus	conversidens	Equus conversidens	Blackwater Draw	North America	USA			1	357.812	7	1	6	1	4	2	14.2857	85.7143	14.2857	57.1429	28.5714	2.42857	grazer	small	Barrón-Ortiz et al. 2019	678.273
Equus	scotti	Equus scotti	Dry Cave (LGM)	North America	USA			15	494.775	6	2	4	1	4	1	33.3333	66.6667	16.6667	66.6667	16.6667	2.16667	grass-dom.	large	Barrón-Ortiz et al. 2019	299
Equus	scotti	Equus scotti	Blackwater Draw	North America	USA					8	2	6	3	3	2	25	75	37.5	37.5	25	2.1875	grass-dom.		Barrón-Ortiz et al. 2019	678.273
Equus	lambei	Equus lambei	Bluefish Caves (Post-LGM and Pre-LGM/LGM data combined)	North America	Canada					13	1	12	3	8	2	7.69231	92.3077	23.0769	61.5385	15.3846	2.38462	grazer		Barrón-Ortiz et al. 2019	586.778
Equus	occidentalis	Equus occidentalis	Rancho la Brea	North America	USA			several (Willoughby 1948)	570.249	103	9	94	31	49	23	8.7	91.3	30.1	47.6	22.3	2.37379	grazer	very large	Cohen et al. 2021	838.5

## Sheet: Summary Table
Taxa	Locality	Continent	Country	Basis for age estimate	Age (Ma) (mean of estimate)	Diet (inferred from MESOWEAR)	Reference (MW)	Diet (inferred from MICROWEAR)	Reference MICROWEAR	Environment (inferred from ISOTOPES)	Author
Equus quagga	modern Africa	Africa	not specified	present	0	grazer	Saarinen (new)	grazer	Rivals et al. 2015
Equus grevyi	modern East Africa	Africa	not specified	present	0	grazer	Saarinen (new)	grazer	Rivals et al. 2015
Equus zebra	modern South Africa	Africa	not specified	present	0	grazer	Schulz and Kaiser 2011, Saarinen (new)
Equus hemionus	Central Asia	Asia	not specified	present	0	grazer	Saarinen (new)
Equus kiang	Tibet	Asia	not specified	present	0	grazer	Saarinen (new)
Equus przewalski	Central Asia	Asia	not specified	present	0	grazer	Schulz and Kaiser 2011, Saarinen (new)
Equus ferus	Gough's Cave	Europe	UK	MIS2	0.022	grazer	Saarinen et al. 2016	grazer	Rivals and Lister 2016
Equus ferus	Kent's Cavern	Europe	UK	MIS3	0.04	grazer	Saarinen et al. 2016	grazer	Rivals and Lister 2016
Equus hydruntinus	Emine Bair Khosar Cave	Europe	Ukraine	MIS3	0.04	grazer	Saarinen (new), based on data in van Asperen et al. 2012
Equus ferus	Aufhausener höhle	Europe	Germany	Weichselian	0.062	grazer	Saarinen et al. 2016
Equus ferus	Lampertheim in der Tanne (Oberrhein)	Europe	Germany	Weichselian	0.062
Equus ferus	Villa Seckendorff	Europe	Germany	late MIS5	0.096	grazer	Saarinen et al. 2016
Equus hydruntinus	Villa Seckendorff	Europe	Germany	late MIS5	0.096	grazer	Saarinen (new)
Equus ferus	Taubach	Europe	Germany	MIS5e	0.116	grazer	Saarinen et al. 2016
Equus ferus	Brighton	Europe	UK	early MIS6	0.175	grazer	Saarinen (new)
Equus ferus	Crayford	Europe	UK	late MIS7	0.2	grazer	Saarinen et al. 2016	grazer	Rivals and Lister 2016
Equus ferus	Brundon	Europe	UK	MIS7	0.217	grazer	Saarinen et al. 2016	mixed	Rivals and Lister 2016
Equus ferus	Ilford	Europe	UK	MIS7	0.217	grass-dom.	Saarinen et al. 2016	grazer	Rivals and Lister 2016
Equus mosbachensis	Schöningen	Europe	Germany	MIS9	0.32	browse-dom.	Saarinen (new)	browse-dom.	Rivals et al. 2015
Equus ferus	Grays Thurrock	Europe	UK	MIS9	0.32	grass-dom.	Saarinen (new)	grass-dom./mixed	Rivals and Lister 2016
Equus ferus	Frankenbacher sande	Europe	Germany	MIS11	0.4
Equus ferus	Hoxne	Europe	UK	MIS11	0.4	grass-dom.	Saarinen et al. 2016	grass-dom.	Rivals and Lister 2016
Equus ferus	Steinheim a.d. Murr, grube Sammet	Europe	Germany	MIS11	0.4	grazer	Saarinen et al. 2016			grazer in open and closed environments	Pushkina et al 2014
Equus ferus	Steinheim a.d. Murr, grube Sigrist	Europe	Germany	MIS11	0.4
Equus ferus	Swanscombe	Europe	UK	MIS11	0.4	grazer	Saarinen et al. 2016	grazer	Rivals and Lister 2016
Equus cf. mosbachensis	Fontana Ranuccio	Europe	Italy	MIS11	0.4	grazer	Strani 2019			grazer in open and closed environments	Strani et al 2019_Frontiers
Equus mosbachensis	Boxgrove	Europe	UK	MIS13	0.5	browse-dom.	Saarinen (new)	mixed	Rivals and Lister 2016
Equus mosbachensis	Mauer	Europe	Germany	MIS15	0.6	grass-dom.				grazer in open and closed environment	Pushkina et al 2014
Equus mosbachensis	Mosbach	Europe	Germany	MIS15	0.6	mixed	Saarinen (new)
Equus cf. mosbachensis	Cava di Breccia - Casal Selce 2	Europe	Italy	MIS15	0.6	grazer	Strani et al 2021
Equus cf. ferus	Vallparadis Estacio EVT3	Europe	Spain	MIS15	0.6	grazer	Strani 2019	mixed feeder	Strani 2019
Equus altidens?	Trimingham	Europe	UK	Cromerian? MIS15?	0.6	grazer	Saarinen (new)
Equus altidens	Süssenborn	Europe	Germany	MIS16	0.65	grass-dom.	Saarinen (new)
Equus suessenbornensis	Süssenborn	Europe	Germany	MIS16	0.65	mixed	Saarinen (new)
Equus suessenbornensis	West Runton	Europe	UK	MIS17	0.7	mixed	Saarinen (new)
Equus altidens	West Runton	Europe	UK	MIS17	0.7		Saarinen (new)	mixed	Rivals and Lister 2016
Equus altidens	Vallparadis Estacio EVT7	Europe	Spain	MIS21	0.858	grazer	Strani 2019	mixed feeder	Strani 2019
Equus altidens	Vallparadis Estacio EVT12	Europe	Spain	MIS31	1	grazer	Strani 2019	grazer	Strani 2019
Equus nalaikhaensis	Nalaikha	Asia	Siberia		1
Equus suessenbornensis	Akhalkalaki	Europe	Georgia		1
Equus stenonis	Apollonia	Europe	Greece		1.15
Equus stenonis	Sainzelles	Europe	France		1.3
Equus altidens	Fuente Nueva 3	Europe	Spain		1.3	grass-dom.	Saarinen et al. 2021
Equus suessenbornensis	Fuente Nueva 3	Europe	Spain		1.3	browse-dom.	Saarinen et al. 2021
Equus altidens	Barranco León	Europe	Spain		1.4	grass-dom.	Saarinen et al. 2021
Equus suessenbornensis	Barranco León	Europe	Spain		1.4	browse-dom.	Saarinen et al. 2021
Equus altidens	Pirro Nord	Europe	Italy		1.45	grazer	Saarinen (new)
Equus oldowayensis	TKII/OLD63	Africa	Tanzania		1.47		Saarinen (new)
Equus altidens	Venta Micena	Europe	Spain		1.5	grazer	Saarinen et al. 2021
Equus major	East Runton	Europe	UK	Pastonian?	1.75	mixed	Saarinen (new)	browse-dom./mixed	Rivals and Lister 2016
Equus stenonis	East Runton	Europe	UK	Pastonian?	1.75	mixed	Saarinen (new)
Equus stehlini	Casa Frata (Upper Valdarno Basin)	Europe	Italy		1.8
Equus mygdoniensis	Mygdona Basin	Europe	Greece		1.8		Saarinen (new)
Equus stenonis	Dmanisi	Europe	Georgia		1.81	grazer	Saarinen (new)
Equus altidens	Dmanisi	Europe	Georgia		1.81	grazer	Saarinen (new)
Equus major	Norwich Crag	Europe	UK	Pre-Pastonian	1.85	browse-dom.	Saarinen (new)
Equus stenonis	Matassino Poggiorosso (Upper Valdarno Basin)	Europe	Italy		1.85
Equus stenonis	Matassino Solava (Upper Valdarno Basin)	Europe	Italy		1.85
Equus stenonis	Olivola	Europe	Italy		1.95	grazer	Strani 2019
Equus stenonis	Puebla de Valverde	Europe	Spain		2
Equus stenonis	Sesklo	Europe	Greece		2	grazer	Rivals and Athanassiou 2009	grazer	Rivals and Athanassiou 2008
Equus stenonis	Volax	Europe	Greece		2
Equus stenonis	Vatera	Europe	Greece		2.1
Equus major	Senèze	Europe	France		2.1
Equus senezensis	Senèze	Europe	France		2.1	grazer	Saarinen (new)
Equus senezensis	Coste San Giacomo	Europe	Italy		2.1	grass-dom.	Strani 2019			grazer in open environment	Strani et al 2019_Frontiers
Equus koobiforensis	Koobi Fora	Africa	Kenya		2.1	grazer	Saarinen (new)
Equus major	Tegelen	Europe	Netherlands		2.3	browse-dom.	Saarinen (new)
Equus major	Pardines	Europe	France		2.3
Equus stenonis	Perrier	Europe	France		2.3
Equus stenonis	Chilhac	Europe	France		2.3
Equus stenonis	Dafnero	Europe	Greece		2.35
Equus stenonis	Saint Vallier	Europe	France		2.4	grazer	Saarinen (new)
Equus major	Red Crag	Europe	Europe	Pre-Ludhamian	2.5	browse-dom.	Saarinen (new)
Equus major	Montopoli	Europe	Italy		2.5
Equus livenzovensis	Livenzovka	Europe	Russia		2.5
Equus livenzovensis	El-Rincon 1	Europe	Spain		2.6
Equus eisenmannae	Longdan	Asia	China		2.55	grazer	Saarinen (new)
Equus simplicidens	Hagerman H.Q.	North America	USA		3.5	grazer	Saarinen (new)
Eurygnathohippus sp.	Makuyuni	Africa	Tanzania	Early Pleistocene		grazer	Wolf et al. 2010
Proboscidipparion sp.	Red Crag	Europe	UK	Late Pliocene	2.7	mixed	Rivals and Lister 2016, Saarinen this volume	browse-dom.	Rivals and Lister 2016
Baryhipparion tchicoicum	Udunga	Asia	Russia	Pliocene (3.4 - 3 Ma)	3.2	grass-dom.	Nakaya et al. 2009
Eurygnathohippus woldegabrieli	Aramis	Africa	Ethiopia	Early Pliocene		grazer	Bernor et al. 2013
Eurygnathohippus hooijeri	Langebaanweg	Africa	South Africa	Early Pliocene	4	grass-dom.	Bernor and Kaiser 2006
Eurygnathohippus feibeli	several localities	Africa	Kenya/Ethiopia	Late Miocene		grass-dom.	Melcher et al. 2014
Cremohipparion periafricanum	Valdecebro	Europe	Spain	MN 13		grazer	Saarinen, this wolume
Hippotherium kammerschmittae	Dorn-Dürkheim	Europe	Germany	MN 13		browse-dom.	Kaiser and Bernor 2006
Hippotherium aff. primigenium	Dorn-Dürkheim	Europe	Germany	MN 13		browse-dom.	Kaiser and Bernor 2006
Hippotherium malpassi	several localities	Europe	Italy	MN 12 - MN 13		grass-dom.	Bernor et al. 2011
Hipparionini indet.	Samos	Europe	Greece	MN 12 - MN 13		grass-dom.	Jokela 2015
Hipparionini sp. Unit 4	Siwaliks	Asia	Pakistan	7.69 - 6.2 Ma	6.95	mixed	Wolf et al. 2013
Hipparionini indet.	Pikermi	Europe	Greece	MN12		grass-dom.	Jokela 2015
Cremohipparion moldavicum	Maragheh	Europe	Iran	MN 12		mixed	Bernor et al. 2014
Cremohipparion matthewi	Maragheh	Europe	Iran	MN 12		grazer	Bernor et al. 2014
Hipparion prostylum	Maragheh	Europe	Iran	MN 12		mixed	Bernor et al. 2014
Hipparion dietrichi	Maragheh	Europe	Iran	MN 12		mixed	Bernor et al. 2014
Hipparion campbelli	Maragheh	Europe	Iran	MN 12		mixed	Bernor et al. 2014
Hippotherium microdon	Baltavar	Europe	Hungary	MN 12		mixed	Kaiser and Bernor 2006
"Cormohipparion" sp.	Chorora	Africa	Ethiopia	8.5 Ma		browse-dom.	Bernor et al. 2004
Hipparionini sp. Unit 3	Siwaliks	Asia	Pakistan	8.69 - 7.7 Ma	8.2	grass-dom.	Wolf et al. 2013
Hipparionini sp. Unit 2	Siwaliks	Asia	Pakistan	MN 10 (9.69 - 8.7 Ma)	9.2	grass-dom.	Wolf et al. 2013
Hippotherium sumegense	Sümeg	Europe	Hungary	MN 9 - MN 10		browse-dom.	Kaiser and Bernor 2006
Hippotherium primigenium	Eppelsheim	Europe	Germany	MN 9		mixed	Kaiser and Bernor 2006
Hippotherium primigenium	Hoewenegg	Europe	Germany	MN 9		browse-dom.	Kaiser and Bernor 2006
Hippotherium intrans	Rudabanya	Europe	Hungary	MN 9		browse-dom.	Kaiser and Bernor 2006
Hipparionini sp. Unit 1	Siwaliks	Asia	Pakistan	MN 9 (10.7 - 9.7 Ma)	10.2	mixed	Wolf et al. 2013
Cormohipparion quinni	Great Plains	North America	USA	late Barstovian		mixed	Bravo-Cuevas and Priego-Vargas 2009
Cormohipparion goorisi	Gulf Coastal Plain	North America	USA	late early - early late Barstovian		mixed	Bravo-Cuevas and Priego-Vargas 2009
Cormohipparion aff. quinni	Oaxaca	North America	Mexico	16 Ma (late early Barstovian)	16	grass-dom.	Bravo-Cuevas and Priego-Vargas 2009
