# Supplementary material for: Evolution of the Family Equidae, Subfamily Equinae, in North, Central and South America, Eurasia and Africa during the Plio-Pleistocene
Source: Biology (Basel). 2022 Aug 24;11(9):1258. doi: 10.3390/biology11091258 (PMC9495906; doi:10.3390/biology11091258)
Supplement: Supplementary file 1 [file biology-11-01258-s001.zip › Supplementary Table S3_Equini paleoecology_summary table.xlsx]

## Sheet: America
Age	Taxa	Locality	Diet
NALMA			MESOWEAR	Reference	MICROWEAR	Reference	ISOTOPES	Reference
Rancholabrean	Equus mexicanus	Cedral	grazer	Barrón-Ortiz, C. R., Theodor, J. M., and Arroyo-Cabrales, J. 2014. Dietary resource partitioning in the late Pleistocene horses from Cedral, north-central Mexico: evidence from the study of dental wear. Revista Mexicana de Ciencias Geológicas. 31(2):260-269	mixed feeder	Barrón-Ortiz, C. R., Theodor, J. M., and Arroyo-Cabrales, J. 2014. Dietary resource partitioning in the late Pleistocene horses from Cedral, north-central Mexico: evidence from the study of dental wear. Revista Mexicana de Ciencias Geológicas. 31(2):260-269
Rancholabrean	Equus conversidens	Cedral	grazer	Barrón-Ortiz, C. R., Theodor, J. M., and Arroyo-Cabrales, J. 2014. Dietary resource partitioning in the late Pleistocene horses from Cedral, north-central Mexico: evidence from the study of dental wear. Revista Mexicana de Ciencias Geológicas. 31(2):260-269	grazer	Barrón-Ortiz, C. R., Theodor, J. M., and Arroyo-Cabrales, J. 2014. Dietary resource partitioning in the late Pleistocene horses from Cedral, north-central Mexico: evidence from the study of dental wear. Revista Mexicana de Ciencias Geológicas. 31(2):260-269
Rancholabrean	Equus cedralensis	Cedral	grazer	Barrón-Ortiz, C. R., Theodor, J. M., and Arroyo-Cabrales, J. 2014. Dietary resource partitioning in the late Pleistocene horses from Cedral, north-central Mexico: evidence from the study of dental wear. Revista Mexicana de Ciencias Geológicas. 31(2):260-269	grazer	Barrón-Ortiz, C. R., Theodor, J. M., and Arroyo-Cabrales, J. 2014. Dietary resource partitioning in the late Pleistocene horses from Cedral, north-central Mexico: evidence from the study of dental wear. Revista Mexicana de Ciencias Geológicas. 31(2):260-269
Rancholabrean	Equus fraternus	Seminole Field, Pinellas Co., Florida	grazer	Mihlbachler, M.C., Rivals, F., Solounias, N., Semprebon, G.M., 2011. Dietary change and evolution of horses in North America. Science 331, 1178–1181.	mixed feeder	Semprebon, G. M., Rivals, F., Solounias, N., and Hulbert, R.ichard, C., Jr (2016) Paleodietary reconstruction of fossil horses from the Eocene through Pleistocene of North America, Palaeogeography, Palaeoclimatology 442, 110–127. doi: 10.1016/j.palaeo.2015.11.004.
Rancholabrean	Equus sp.	Fairbanks, Alaska			grazer	Semprebon, G. M., Rivals, F., Solounias, N., and Hulbert, R.ichard, C., Jr (2016) Paleodietary reconstruction of fossil horses from the Eocene through Pleistocene of North America, Palaeogeography, Palaeoclimatology 442, 110–127. doi: 10.1016/j.palaeo.2015.11.004.
Rancholabrean	Equus pacificus	Fossil Lake, Lace Col, Oregon	grazer	Mihlbachler, M.C., Rivals, F., Solounias, N., Semprebon, G.M., 2011. Dietary change and evolution of horses in North America. Science 331, 1178–1181.	mixed feeder	Semprebon, G. M., Rivals, F., Solounias, N., and Hulbert, R.ichard, C., Jr (2016) Paleodietary reconstruction of fossil horses from the Eocene through Pleistocene of North America, Palaeogeography, Palaeoclimatology 442, 110–127. doi: 10.1016/j.palaeo.2015.11.004.
Rancholabrean	Equus mexicanus	La Cinta-Portalitos	grazer	Marín-Leyva, A.H., DeMiguel, D., García-Zepeda, M.L., Ponce-Saavedra, J., Arroyo-Cabrales, J., Schaaf, P., Alberdi, M.T., 2016. Dietary adaptability of Late Pleistocene Equus from West Central Mexico. Palaeogeogr. Palaeoclimatol. Palaeoecol. 441, 748–757. https://doi.org/10.1016/j.palaeo.2015.10.019	mixed feeder	Marín-Leyva, A.H., DeMiguel, D., García-Zepeda, M.L., Ponce-Saavedra, J., Arroyo-Cabrales, J., Schaaf, P., Alberdi, M.T., 2016. Dietary adaptability of Late Pleistocene Equus from West Central Mexico. Palaeogeogr. Palaeoclimatol. Palaeoecol. 441, 748–757. https://doi.org/10.1016/j.palaeo.2015.10.019
Rancholabrean	Equus conversidens	La Cinta-Portalitos	grazer	Marín-Leyva, A.H., DeMiguel, D., García-Zepeda, M.L., Ponce-Saavedra, J., Arroyo-Cabrales, J., Schaaf, P., Alberdi, M.T., 2016. Dietary adaptability of Late Pleistocene Equus from West Central Mexico. Palaeogeogr. Palaeoclimatol. Palaeoecol. 441, 748–757. https://doi.org/10.1016/j.palaeo.2015.10.019	mixed feeder	Marín-Leyva, A.H., DeMiguel, D., García-Zepeda, M.L., Ponce-Saavedra, J., Arroyo-Cabrales, J., Schaaf, P., Alberdi, M.T., 2016. Dietary adaptability of Late Pleistocene Equus from West Central Mexico. Palaeogeogr. Palaeoclimatol. Palaeoecol. 441, 748–757. https://doi.org/10.1016/j.palaeo.2015.10.019
Rancholabrean	Equus cedralensis	La Cinta-Portalitos	grass-dominated mixed feeder	Marín-Leyva, A.H., DeMiguel, D., García-Zepeda, M.L., Ponce-Saavedra, J., Arroyo-Cabrales, J., Schaaf, P., Alberdi, M.T., 2016. Dietary adaptability of Late Pleistocene Equus from West Central Mexico. Palaeogeogr. Palaeoclimatol. Palaeoecol. 441, 748–757. https://doi.org/10.1016/j.palaeo.2015.10.019	mixed feeder	Marín-Leyva, A.H., DeMiguel, D., García-Zepeda, M.L., Ponce-Saavedra, J., Arroyo-Cabrales, J., Schaaf, P., Alberdi, M.T., 2016. Dietary adaptability of Late Pleistocene Equus from West Central Mexico. Palaeogeogr. Palaeoclimatol. Palaeoecol. 441, 748–757. https://doi.org/10.1016/j.palaeo.2015.10.019
Rancholabrean	Equus mexicanus	La Piedad-Santa Ana	grazer	Marín-Leyva, A.H., DeMiguel, D., García-Zepeda, M.L., Ponce-Saavedra, J., Arroyo-Cabrales, J., Schaaf, P., Alberdi, M.T., 2016. Dietary adaptability of Late Pleistocene Equus from West Central Mexico. Palaeogeogr. Palaeoclimatol. Palaeoecol. 441, 748–757. https://doi.org/10.1016/j.palaeo.2015.10.019	grazer	Marín-Leyva, A.H., DeMiguel, D., García-Zepeda, M.L., Ponce-Saavedra, J., Arroyo-Cabrales, J., Schaaf, P., Alberdi, M.T., 2016. Dietary adaptability of Late Pleistocene Equus from West Central Mexico. Palaeogeogr. Palaeoclimatol. Palaeoecol. 441, 748–757. https://doi.org/10.1016/j.palaeo.2015.10.019
Rancholabrean	Equus conversidens	La Piedad-Santa Ana	grazer	Marín-Leyva, A.H., DeMiguel, D., García-Zepeda, M.L., Ponce-Saavedra, J., Arroyo-Cabrales, J., Schaaf, P., Alberdi, M.T., 2016. Dietary adaptability of Late Pleistocene Equus from West Central Mexico. Palaeogeogr. Palaeoclimatol. Palaeoecol. 441, 748–757. https://doi.org/10.1016/j.palaeo.2015.10.019	grazer	Marín-Leyva, A.H., DeMiguel, D., García-Zepeda, M.L., Ponce-Saavedra, J., Arroyo-Cabrales, J., Schaaf, P., Alberdi, M.T., 2016. Dietary adaptability of Late Pleistocene Equus from West Central Mexico. Palaeogeogr. Palaeoclimatol. Palaeoecol. 441, 748–757. https://doi.org/10.1016/j.palaeo.2015.10.019
Rancholabrean	Equus cedralensis	La Piedad-Santa Ana	grazer	Marín-Leyva, A.H., DeMiguel, D., García-Zepeda, M.L., Ponce-Saavedra, J., Arroyo-Cabrales, J., Schaaf, P., Alberdi, M.T., 2016. Dietary adaptability of Late Pleistocene Equus from West Central Mexico. Palaeogeogr. Palaeoclimatol. Palaeoecol. 441, 748–757. https://doi.org/10.1016/j.palaeo.2015.10.019	grazer	Marín-Leyva, A.H., DeMiguel, D., García-Zepeda, M.L., Ponce-Saavedra, J., Arroyo-Cabrales, J., Schaaf, P., Alberdi, M.T., 2016. Dietary adaptability of Late Pleistocene Equus from West Central Mexico. Palaeogeogr. Palaeoclimatol. Palaeoecol. 441, 748–757. https://doi.org/10.1016/j.palaeo.2015.10.019
Rancholabrean	Equus conversidens	Hidalgo (Las Cajas, El Barrio, Barranca Piedras Negras, Barranca del Berrendo, Barranca San Agustín)	grazer	Bravo-Cuevas, V.M., Jiménez-Hidalgo, E., Priego-Vargas, J., 2011. Taxonomía y hábito alimentario de Equus conversidens (Perissodactyla, Equidae) del pleistoceno tardío (Rancholabreano) de Hidalgo, centro de México. Rev. Mex. Ciencias Geol. 28, 65–82.
Rancholabrean	Equussp.	Gruta de Loltún
Rancholabrean	Equussp.	Laguna de las Cruces
Rancholabrean	Equussp.	La Presita
Rancholabrean	Equussp.	Los Grifos
Rancholabrean	Equussp.	Tequisxquiac
Rancholabrean	Equussp.	Valsequillo
Irvingtonian	Equus sp.	Rock Co. Gravel Pit, Rock Co. Nebraska	grazer	Mihlbachler, M.C., Rivals, F., Solounias, N., Semprebon, G.M., 2011. Dietary change and evolution of horses in North America. Science 331, 1178–1181.	mixed feeder	Semprebon, G. M., Rivals, F., Solounias, N., and Hulbert, R.ichard, C., Jr (2016) Paleodietary reconstruction of fossil horses from the Eocene through Pleistocene of North America, Palaeogeography, Palaeoclimatology 442, 110–127. doi: 10.1016/j.palaeo.2015.11.004.
Irvingtonian	Equus calobatus	Arkalon area, Seward Co., Kansas			mixed feeder	Semprebon, G. M., Rivals, F., Solounias, N., and Hulbert, R.ichard, C., Jr (2016) Paleodietary reconstruction of fossil horses from the Eocene through Pleistocene of North America, Palaeogeography, Palaeoclimatology 442, 110–127. doi: 10.1016/j.palaeo.2015.11.004.
Irvingtonian	Equus complicatus	Sheridan Beds, Hay Springs Area, Sheridan Co., Nebraska	grazer	Mihlbachler, M.C., Rivals, F., Solounias, N., Semprebon, G.M., 2011. Dietary change and evolution of horses in North America. Science 331, 1178–1181.	mixed feeder	Semprebon, G. M., Rivals, F., Solounias, N., and Hulbert, R.ichard, C., Jr (2016) Paleodietary reconstruction of fossil horses from the Eocene through Pleistocene of North America, Palaeogeography, Palaeoclimatology 442, 110–127. doi: 10.1016/j.palaeo.2015.11.004.
Early Irvingtonian	Equus sp. A	Bermont Fm., Leisey Shell Pit 1A, Hillsborough Co., Florida			mixed feeder	Semprebon, G. M., Rivals, F., Solounias, N., and Hulbert, R.ichard, C., Jr (2016) Paleodietary reconstruction of fossil horses from the Eocene through Pleistocene of North America, Palaeogeography, Palaeoclimatology 442, 110–127. doi: 10.1016/j.palaeo.2015.11.004.
Early Irvingtonian	Equus sp. B	Bermont Fm., Leisey Shell Pit 1A, Hillsborough Co., Florida			mixed feeder	Semprebon, G. M., Rivals, F., Solounias, N., and Hulbert, R.ichard, C., Jr (2016) Paleodietary reconstruction of fossil horses from the Eocene through Pleistocene of North America, Palaeogeography, Palaeoclimatology 442, 110–127. doi: 10.1016/j.palaeo.2015.11.004.
Late Blancan	Equus sp.	Lake Agassiz, North Dakota	grazer	Mihlbachler, M.C., Rivals, F., Solounias, N., Semprebon, G.M., 2011. Dietary change and evolution of horses in North America. Science 331, 1178–1181.	browser	Semprebon, G. M., Rivals, F., Solounias, N., and Hulbert, R.ichard, C., Jr (2016) Paleodietary reconstruction of fossil horses from the Eocene through Pleistocene of North America, Palaeogeography, Palaeoclimatology 442, 110–127. doi: 10.1016/j.palaeo.2015.11.004.
Blancan	Nannipus peninsulatus	Ogallala Grp., Crosby Co., Texas			mixed feeder	Semprebon, G. M., Rivals, F., Solounias, N., and Hulbert, R.ichard, C., Jr (2016) Paleodietary reconstruction of fossil horses from the Eocene through Pleistocene of North America, Palaeogeography, Palaeoclimatology 442, 110–127. doi: 10.1016/j.palaeo.2015.11.004.
3.5	Equus simplicidens	Hagerman H.Q.	grazer	Saarinen (new)
Early Blancan	Equus simplicidens	Glenns Ferry Fm., Hagerman Horse Quarry, Twin Falls Co., Idaho	grazer	Mihlbachler, M.C., Rivals, F., Solounias, N., Semprebon, G.M., 2011. Dietary change and evolution of horses in North America. Science 331, 1178–1181.	grazer	Semprebon, G. M., Rivals, F., Solounias, N., and Hulbert, R.ichard, C., Jr (2016) Paleodietary reconstruction of fossil horses from the Eocene through Pleistocene of North America, Palaeogeography, Palaeoclimatology 442, 110–127. doi: 10.1016/j.palaeo.2015.11.004.
Early Blancan	Equus simplicidens	Kiem Fm., Sand Draw Local Fauna, Ainsworth Area, Brown Co., Nebraska	grazer	Mihlbachler, M.C., Rivals, F., Solounias, N., Semprebon, G.M., 2011. Dietary change and evolution of horses in North America. Science 331, 1178–1181.	mixed feeder	Semprebon, G. M., Rivals, F., Solounias, N., and Hulbert, R.ichard, C., Jr (2016) Paleodietary reconstruction of fossil horses from the Eocene through Pleistocene of North America, Palaeogeography, Palaeoclimatology 442, 110–127. doi: 10.1016/j.palaeo.2015.11.004.
Early Blancan	Equus sp.	Dry and Northern Whitlock Mtn Localities, Graham Co., Arizona	grazer	Mihlbachler, M.C., Rivals, F., Solounias, N., Semprebon, G.M., 2011. Dietary change and evolution of horses in North America. Science 331, 1178–1181.	mixed feeder	Semprebon, G. M., Rivals, F., Solounias, N., and Hulbert, R.ichard, C., Jr (2016) Paleodietary reconstruction of fossil horses from the Eocene through Pleistocene of North America, Palaeogeography, Palaeoclimatology 442, 110–127. doi: 10.1016/j.palaeo.2015.11.004.
Early Blancan	Equus sp.	St. David Fm., Benson Area, Cochise Co. Arizona	grazer	Mihlbachler, M.C., Rivals, F., Solounias, N., Semprebon, G.M., 2011. Dietary change and evolution of horses in North America. Science 331, 1178–1181.	mixed feeder	Semprebon, G. M., Rivals, F., Solounias, N., and Hulbert, R.ichard, C., Jr (2016) Paleodietary reconstruction of fossil horses from the Eocene through Pleistocene of North America, Palaeogeography, Palaeoclimatology 442, 110–127. doi: 10.1016/j.palaeo.2015.11.004.
Latest Hemphillian	Nannipus aztecus	Bone Valley Fm., Various Quarries, Florida	browser or mixed feeder	Mihlbachler, M.C., Rivals, F., Solounias, N., Semprebon, G.M., 2011. Dietary change and evolution of horses in North America. Science 331, 1178–1181.	mixed feeder	Semprebon, G. M., Rivals, F., Solounias, N., and Hulbert, R.ichard, C., Jr (2016) Paleodietary reconstruction of fossil horses from the Eocene through Pleistocene of North America, Palaeogeography, Palaeoclimatology 442, 110–127. doi: 10.1016/j.palaeo.2015.11.004.	C3/C4 grazer	MacFadden, B.J., 2008. Geographic variation in diets of ancient populations of 5-million-year-old (early Pliocene) horses from southern North America. Palaeogeography, Palaeoclimatology, Palaeoecology 266 , 83-94 83–94
Latest Hemphillian	Pseudhipparion simpsoni	Bone Valley Fm., Various Quarries, Florida			mixed feeder	Semprebon, G. M., Rivals, F., Solounias, N., and Hulbert, R.ichard, C., Jr (2016) Paleodietary reconstruction of fossil horses from the Eocene through Pleistocene of North America, Palaeogeography, Palaeoclimatology 442, 110–127. doi: 10.1016/j.palaeo.2015.11.004.
Latest Hemphillian	Neohipparion eurystyle	Bone Valley Fm., Polk and Hardee Cos., Florida			grazer	Semprebon, G. M., Rivals, F., Solounias, N., and Hulbert, R.ichard, C., Jr (2016) Paleodietary reconstruction of fossil horses from the Eocene through Pleistocene of North America, Palaeogeography, Palaeoclimatology 442, 110–127. doi: 10.1016/j.palaeo.2015.11.004.	C4 grazer	MacFadden, B.J., 2008. Geographic variation in diets of ancient populations of 5-million-year-old (early Pliocene) horses from southern North America. Palaeogeography, Palaeoclimatology, Palaeoecology 266 , 83-94 83–94
Latest Hemphillian	Cormohipparion emsliei	Bone Valley Fm., Various Localities, Florida			mixed feeder	Semprebon, G. M., Rivals, F., Solounias, N., and Hulbert, R.ichard, C., Jr (2016) Paleodietary reconstruction of fossil horses from the Eocene through Pleistocene of North America, Palaeogeography, Palaeoclimatology 442, 110–127. doi: 10.1016/j.palaeo.2015.11.004.
Late Hemphillian	Dinohippus leidyanus	Snake Creek Fm., Johnson Mbr., Sioux Co., Nebraska			grazer	Semprebon, G. M., Rivals, F., Solounias, N., and Hulbert, R.ichard, C., Jr (2016) Paleodietary reconstruction of fossil horses from the Eocene through Pleistocene of North America, Palaeogeography, Palaeoclimatology 442, 110–127. doi: 10.1016/j.palaeo.2015.11.004.
Late Hemphillian	Dinohippus leidyanus	Quiburis Fm. Redington Area, Old Cabin Quarry, Pima Co., Arizona	mixed feeder or grazer	Mihlbachler, M.C., Rivals, F., Solounias, N., Semprebon, G.M., 2011. Dietary change and evolution of horses in North America. Science 331, 1178–1181.	mixed feeder	Semprebon, G. M., Rivals, F., Solounias, N., and Hulbert, R.ichard, C., Jr (2016) Paleodietary reconstruction of fossil horses from the Eocene through Pleistocene of North America, Palaeogeography, Palaeoclimatology 442, 110–127. doi: 10.1016/j.palaeo.2015.11.004.
Late Hemphillian	Dinohippus sp.	Ogallala Group, Edson Area, Sherman Co., Kansas	grazer	Mihlbachler, M.C., Rivals, F., Solounias, N., Semprebon, G.M., 2011. Dietary change and evolution of horses in North America. Science 331, 1178–1181.	grazer	Semprebon, G. M., Rivals, F., Solounias, N., and Hulbert, R.ichard, C., Jr (2016) Paleodietary reconstruction of fossil horses from the Eocene through Pleistocene of North America, Palaeogeography, Palaeoclimatology 442, 110–127. doi: 10.1016/j.palaeo.2015.11.004.
Late Hemphillian	Dinohippus interpolatus	Eden Fm., Riverside Co., California			mixed feeder	Semprebon, G. M., Rivals, F., Solounias, N., and Hulbert, R.ichard, C., Jr (2016) Paleodietary reconstruction of fossil horses from the Eocene through Pleistocene of North America, Palaeogeography, Palaeoclimatology 442, 110–127. doi: 10.1016/j.palaeo.2015.11.004.
Hemphillian	Dinohippus mexicanus	Tecolotlan	mixed feeder	Barrón-Ortiz, C. R. and Guzmán-Gutiérrez, J. R. 2009. Hábitos alimenticios de los caballos Dinohippus mexicanus y Neohipparion eurystyle del Hemphiliano Tardío de Tecolotlan, Jalisco, México. Investigación y Ciencia de la Universidad Autónoma de Aguascalientes. 45(3):24-29.
Hemphillian	Neohipparion eurystile	Tecolotlan	grazer	Barrón-Ortiz, C. R. and Guzmán-Gutiérrez, J. R. 2009. Hábitos alimenticios de los caballos Dinohippus mexicanus y Neohipparion eurystyle del Hemphiliano Tardío de Tecolotlan, Jalisco, México. Investigación y Ciencia de la Universidad Autónoma de Aguascalientes. 45(3):24-29.
Late Clarendonian	Hipparion tehonense	Clarendon Beds, MacAdams Quarry, Donley Co., Texas	mixed feeder or grazer	Mihlbachler, M.C., Rivals, F., Solounias, N., Semprebon, G.M., 2011. Dietary change and evolution of horses in North America. Science 331, 1178–1181.	mixed feeder
Late Clarendonian	Cormohipparian occidentale	Ash Hollow Fm., Xmas Quarry Zone, Merritt Dam Mbr., Cherry Co., Nebraska	mixed feeder or grazer	Mihlbachler, M.C., Rivals, F., Solounias, N., Semprebon, G.M., 2011. Dietary change and evolution of horses in North America. Science 331, 1178–1181.	grazer	Semprebon, G. M., Rivals, F., Solounias, N., and Hulbert, R.ichard, C., Jr (2016) Paleodietary reconstruction of fossil horses from the Eocene through Pleistocene of North America, Palaeogeography, Palaeoclimatology 442, 110–127. doi: 10.1016/j.palaeo.2015.11.004.
Late Clarendonian	Calippus martini	Ash Hollow Fm., Merritt Dam Mbr., Cherry Co., Nebraska			grazer	Semprebon, G. M., Rivals, F., Solounias, N., and Hulbert, R.ichard, C., Jr (2016) Paleodietary reconstruction of fossil horses from the Eocene through Pleistocene of North America, Palaeogeography, Palaeoclimatology 442, 110–127. doi: 10.1016/j.palaeo.2015.11.004.
Clarendonian	Pseudhipparion hessei	Ogallala Fm., Donley Co., Texas	grazer	Mihlbachler, M.C., Rivals, F., Solounias, N., Semprebon, G.M., 2011. Dietary change and evolution of horses in North America. Science 331, 1178–1181.	mixed feeder	Semprebon, G. M., Rivals, F., Solounias, N., and Hulbert, R.ichard, C., Jr (2016) Paleodietary reconstruction of fossil horses from the Eocene through Pleistocene of North America, Palaeogeography, Palaeoclimatology 442, 110–127. doi: 10.1016/j.palaeo.2015.11.004.
late Barstovian	Cormohipparion quinni	Great Plains	mixed	Bravo-Cuevas, V. M., and Priego-Vargas, J. 2009. Dietary evaluation of a hipparionin horse population from the Middle Miocene of Oaxaca, southeastern Mexico. Revista Mexicana de Ciencias Geológicas. 26(2):356-366.
late early - early late Barstovian	Cormohipparion goorisi	Gulf Coastal Plain	mixed	Bravo-Cuevas, V. M., and Priego-Vargas, J. 2009. Dietary evaluation of a hipparionin horse population from the Middle Miocene of Oaxaca, southeastern Mexico. Revista Mexicana de Ciencias Geológicas. 26(2):356-366.
16 Ma (late early Barstovian)	Cormohipparion aff. quinni	Oaxaca	grass-dominated mixed feeder	Bravo-Cuevas, V. M., and Priego-Vargas, J. 2009. Dietary evaluation of a hipparionin horse population from the Middle Miocene of Oaxaca, southeastern Mexico. Revista Mexicana de Ciencias Geológicas. 26(2):356-366.
Barstovian	Cormohipparion aff. C. quinni	Nejapa de Madero	grass-dominated mixed feeder	Bravo-Cuevas, V. M., and Priego-Vargas, J. 2009. Dietary evaluation of a hipparionin horse population from the Middle Miocene of Oaxaca, southeastern Mexico. Revista Mexicana de Ciencias Geológicas. 26(2):356-366.

## Sheet: Europe
Age		Taxa	Locality	Continent	Country	Diet
MARINE ISOTOPIC STAGE/NALMA/OTHER	Ma (mean of estimate)					MESOWEAR	Reference	MICROWEAR	Reference	ISOTOPES	Reference
MIS2	0.022	Equus ferus	Gough's Cave	Europe	UK	grazer	Saarinen, J.; Eronen, J.; Fortelius, M.; Seppä, H.; Lister, A.M. Patterns of diet and body mass of large ungulates from the Pleistocene of Western Europe, and their relation to vegetation. Palaeontologia Electronica, 2016, 19.3.32A, 1-58	grazer	Rivals, F.; Lister, A.M. Dietary flexibility and niche partitioning of large herbivores through the Pleistocene of Britain. Quaternary Science Reviews 2016, 146, 116-133
MIS3	0.04	Equus ferus	Kent's Cavern	Europe	UK	grazer	Saarinen, J.; Eronen, J.; Fortelius, M.; Seppä, H.; Lister, A.M. Patterns of diet and body mass of large ungulates from the Pleistocene of Western Europe, and their relation to vegetation. Palaeontologia Electronica, 2016, 19.3.32A, 1-59	grazer	Rivals, F.; Lister, A.M. Dietary flexibility and niche partitioning of large herbivores through the Pleistocene of Britain. Quaternary Science Reviews 2016, 146, 116-134
MIS3	0.04	Equus hydruntinus	Emine Bair Khosar Cave	Europe	Ukraine	grazer	Saarinen (new), based on data in van Asperen et al. 2012
Weichselian	0.062	Equus ferus	Aufhausener höhle	Europe	Germany	grazer	Saarinen, J.; Eronen, J.; Fortelius, M.; Seppä, H.; Lister, A.M. Patterns of diet and body mass of large ungulates from the Pleistocene of Western Europe, and their relation to vegetation. Palaeontologia Electronica, 2016, 19.3.32A, 1-59
Weichselian	0.062	Equus ferus	Lampertheim in der Tanne (Oberrhein)	Europe	Germany
late MIS5	0.096	Equus ferus	Villa Seckendorff	Europe	Germany	grazer	Saarinen, J.; Eronen, J.; Fortelius, M.; Seppä, H.; Lister, A.M. Patterns of diet and body mass of large ungulates from the Pleistocene of Western Europe, and their relation to vegetation. Palaeontologia Electronica, 2016, 19.3.32A, 1-59
late MIS5	0.096	Equus hydruntinus	Villa Seckendorff	Europe	Germany	grazer	Saarinen (new)
MIS5e	0.116	Equus ferus	Taubach	Europe	Germany	grazer	Saarinen, J.; Eronen, J.; Fortelius, M.; Seppä, H.; Lister, A.M. Patterns of diet and body mass of large ungulates from the Pleistocene of Western Europe, and their relation to vegetation. Palaeontologia Electronica, 2016, 19.3.32A, 1-59
early MIS6	0.175	Equus ferus	Brighton	Europe	UK	grazer	Saarinen (new)
late MIS7	0.2	Equus ferus	Crayford	Europe	UK	grazer	Saarinen, J.; Eronen, J.; Fortelius, M.; Seppä, H.; Lister, A.M. Patterns of diet and body mass of large ungulates from the Pleistocene of Western Europe, and their relation to vegetation. Palaeontologia Electronica, 2016, 19.3.32A, 1-59	grazer	Rivals, F.; Lister, A.M. Dietary flexibility and niche partitioning of large herbivores through the Pleistocene of Britain. Quaternary Science Reviews 2016, 146, 116-134
MIS7	0.217	Equus ferus	Brundon	Europe	UK	grazer	Saarinen, J.; Eronen, J.; Fortelius, M.; Seppä, H.; Lister, A.M. Patterns of diet and body mass of large ungulates from the Pleistocene of Western Europe, and their relation to vegetation. Palaeontologia Electronica, 2016, 19.3.32A, 1-60	mixed	Rivals, F.; Lister, A.M. Dietary flexibility and niche partitioning of large herbivores through the Pleistocene of Britain. Quaternary Science Reviews 2016, 146, 116-135
MIS7	0.217	Equus ferus	Ilford	Europe	UK	grass-dom.	Saarinen, J.; Eronen, J.; Fortelius, M.; Seppä, H.; Lister, A.M. Patterns of diet and body mass of large ungulates from the Pleistocene of Western Europe, and their relation to vegetation. Palaeontologia Electronica, 2016, 19.3.32A, 1-61	grazer	Rivals, F.; Lister, A.M. Dietary flexibility and niche partitioning of large herbivores through the Pleistocene of Britain. Quaternary Science Reviews 2016, 146, 116-136
MIS9	0.32	Equus mosbachensis	Schöningen	Europe	Germany	browse-dom.	Saarinen (new)	browse-dom.	Rivals, F.; Julien, M.-A.; Kuitems, M.; Van Kolfschoten, T.; Serangeli, J.; Drucker, D.G.; Bocherens, H.; Conard, N.J. Investigation of equid paleodiet from Schöningen 13 II-4 through dental wear and isotopic analyses: Archaeological implications. Journal of Human Evolution 2015, 89, 129-137
MIS9	0.32	Equus ferus	Grays Thurrock	Europe	UK	grass-dom.	Saarinen (new)	grass-dom./mixed	Rivals, F.; Lister, A.M. Dietary flexibility and niche partitioning of large herbivores through the Pleistocene of Britain. Quaternary Science Reviews 2016, 146, 116-134
MIS11	0.4	Equus ferus	Frankenbacher sande	Europe	Germany
MIS11	0.4	Equus ferus	Hoxne	Europe	UK	grass-dom.	Saarinen, J.; Eronen, J.; Fortelius, M.; Seppä, H.; Lister, A.M. Patterns of diet and body mass of large ungulates from the Pleistocene of Western Europe, and their relation to vegetation. Palaeontologia Electronica, 2016, 19.3.32A, 1-61	grass-dom.	Rivals, F.; Lister, A.M. Dietary flexibility and niche partitioning of large herbivores through the Pleistocene of Britain. Quaternary Science Reviews 2016, 146, 116-134
MIS11	0.4	Equus ferus	Steinheim a.d. Murr, grube Sammet	Europe	Germany	grazer	Saarinen, J.; Eronen, J.; Fortelius, M.; Seppä, H.; Lister, A.M. Patterns of diet and body mass of large ungulates from the Pleistocene of Western Europe, and their relation to vegetation. Palaeontologia Electronica, 2016, 19.3.32A, 1-62			grazer in open and closed environments	Pushkina, D., Bocherens, H., and Ziegler, R. (2014). Unexpected palaeoecological features of the Middle and Late Pleistocene large herbivores in southwestern Germany revealed by stable isotopic abundances in tooth enamel. Quat. Int. 339–340, 164–178.
MIS11	0.4	Equus ferus	Steinheim a.d. Murr, grube Sigrist	Europe	Germany
MIS11	0.4	Equus ferus	Swanscombe	Europe	UK	grazer	Saarinen, J.; Eronen, J.; Fortelius, M.; Seppä, H.; Lister, A.M. Patterns of diet and body mass of large ungulates from the Pleistocene of Western Europe, and their relation to vegetation. Palaeontologia Electronica, 2016, 19.3.32A, 1-62	grazer	Rivals, F.; Lister, A.M. Dietary flexibility and niche partitioning of large herbivores through the Pleistocene of Britain. Quaternary Science Reviews 2016, 146, 116-134
MIS11	0.4	Equus cf. mosbachensis	Fontana Ranuccio	Europe	Italy	grazer	Strani F., Pushkina D., Bocherens H., Bellucci L., Sardella R., DeMiguel D. 2019. Dietary Adaptations of Early and Middle Pleistocene Equids from the Anagni Basin (Frosinone, Central Italy). Frontiers in Ecology and Evolution 7, 176			grazer in open and closed environments	Strani F., Pushkina D., Bocherens H., Bellucci L., Sardella R., DeMiguel D. 2019. Dietary Adaptations of Early and Middle Pleistocene Equids from the Anagni Basin (Frosinone, Central Italy). Frontiers in Ecology and Evolution 7, 176
MIS13	0.5	Equus mosbachensis	Boxgrove	Europe	UK	browse-dom.	Saarinen (new)	mixed	Rivals, F.; Lister, A.M. Dietary flexibility and niche partitioning of large herbivores through the Pleistocene of Britain. Quaternary Science Reviews 2016, 146, 116-134
MIS15	0.6	Equus mosbachensis	Mauer	Europe	Germany	grass-dom.				grazer in open and closed environment	Pushkina, D., Bocherens, H., and Ziegler, R. (2014). Unexpected palaeoecological features of the Middle and Late Pleistocene large herbivores in southwestern Germany revealed by stable isotopic abundances in tooth enamel. Quat. Int. 339–340, 164–178.
MIS15	0.6	Equus mosbachensis	Mosbach	Europe	Germany	mixed	Saarinen (new)
MIS15	0.6	Equus cf. mosbachensis	Cava di Breccia - Casal Selce 2	Europe	Italy	grazer	Strani F., Bellucci L., Iannucci A., Iurino D.A., Mecozzi B., Sardella R. 2022. Palaeoenvironments of the MIS 15 site of Cava di Breccia - Casal Selce 2 (central Italian Peninsula) and niche occupation of fossil ungulates during Middle Pleistocene interglacials. Historical Biology. 34(3), 555-565.
MIS15	0.6	Equus cf. ferus	Vallparadis Estacio EVT3	Europe	Spain	grazer	Strani F., DeMiguel D., Alba D.M., Moyà-Solà S., Bellucci L., Sardella R., Madurell-Malapeira J. 2019. The effects of the “0.9 Ma event” on the Mediterranean ecosystems during the Early-Middle Pleistocene Transition as revealed by dental wear patterns of fossil ungulates. Quaternary Science Reviews 210, 80–89.	mixed feeder	Strani F., DeMiguel D., Alba D.M., Moyà-Solà S., Bellucci L., Sardella R., Madurell-Malapeira J. 2019. The effects of the “0.9 Ma event” on the Mediterranean ecosystems during the Early-Middle Pleistocene Transition as revealed by dental wear patterns of fossil ungulates. Quaternary Science Reviews 210, 80–89.
Cromerian? MIS15?	0.6	Equus altidens?	Trimingham	Europe	UK	grazer	Saarinen (new)
MIS16	0.65	Equus altidens	Süssenborn	Europe	Germany	grass-dom.	Saarinen (new)
MIS16	0.65	Equus suessenbornensis	Süssenborn	Europe	Germany	mixed	Saarinen (new)
MIS17	0.7	Equus suessenbornensis	West Runton	Europe	UK	mixed	Saarinen (new)
MIS17	0.7	Equus altidens	West Runton	Europe	UK		Saarinen (new)	mixed	Rivals, F.; Lister, A.M. Dietary flexibility and niche partitioning of large herbivores through the Pleistocene of Britain. Quaternary Science Reviews 2016, 146, 116-134
MIS17	0,75-0,70	Equus altidens	Cúllar de Baza-1	Europe	Spain	mixed	Bellucci L., Palombo M.R., DeMiguel D., Strani F., Alberdi M.T. 2021. New taxonomical, biochronological and palaeoenvironmental data from the Middle Pleistocene site of Cúllar de Baza 1 (Granada, Spain). Quaternary Science Reviews 261, 106932.
MIS17	0,75-0,70	Equus suessenbornensis	Cúllar de Baza-1	Europe	Spain	mixed	Bellucci L., Palombo M.R., DeMiguel D., Strani F., Alberdi M.T. 2021. New taxonomical, biochronological and palaeoenvironmental data from the Middle Pleistocene site of Cúllar de Baza 1 (Granada, Spain). Quaternary Science Reviews 261, 106932.
MIS21	0.858	Equus altidens	Vallparadis Estacio EVT7	Europe	Spain	grazer	Strani F., DeMiguel D., Alba D.M., Moyà-Solà S., Bellucci L., Sardella R., Madurell-Malapeira J. 2019. The effects of the “0.9 Ma event” on the Mediterranean ecosystems during the Early-Middle Pleistocene Transition as revealed by dental wear patterns of fossil ungulates. Quaternary Science Reviews 210, 80–89.	mixed feeder	Strani F., DeMiguel D., Alba D.M., Moyà-Solà S., Bellucci L., Sardella R., Madurell-Malapeira J. 2019. The effects of the “0.9 Ma event” on the Mediterranean ecosystems during the Early-Middle Pleistocene Transition as revealed by dental wear patterns of fossil ungulates. Quaternary Science Reviews 210, 80–89.
MIS31	1	Equus altidens	Vallparadis Estacio EVT12	Europe	Spain	grazer	Strani F., DeMiguel D., Alba D.M., Moyà-Solà S., Bellucci L., Sardella R., Madurell-Malapeira J. 2019. The effects of the “0.9 Ma event” on the Mediterranean ecosystems during the Early-Middle Pleistocene Transition as revealed by dental wear patterns of fossil ungulates. Quaternary Science Reviews 210, 80–89.	grazer	Strani F., DeMiguel D., Alba D.M., Moyà-Solà S., Bellucci L., Sardella R., Madurell-Malapeira J. 2019. The effects of the “0.9 Ma event” on the Mediterranean ecosystems during the Early-Middle Pleistocene Transition as revealed by dental wear patterns of fossil ungulates. Quaternary Science Reviews 210, 80–89.
	1	Equus suessenbornensis	Akhalkalaki	Europe	Georgia
	1.15	Equus stenonis	Apollonia	Europe	Greece
	1.3	Equus stenonis	Sainzelles	Europe	France
	1.3	Equus altidens	Fuente Nueva 3	Europe	Spain	grass-dom.	Saarinen, J.; Cirilli, O.; Strani, F.; Meshida, K.; Bernor, R.L. Testing equid body mass estimate equations on modern zebras – with implications to understanding the relationship of body size, diet and habitats of Equus in the Pleistocene of Europe. Frontiers in Ecology and Evolution, 2021, 9, 622412
	1.3	Equus suessenbornensis	Fuente Nueva 3	Europe	Spain	browse-dom.	Saarinen, J.; Cirilli, O.; Strani, F.; Meshida, K.; Bernor, R.L. Testing equid body mass estimate equations on modern zebras – with implications to understanding the relationship of body size, diet and habitats of Equus in the Pleistocene of Europe. Frontiers in Ecology and Evolution, 2021, 9, 622412
	1.4	Equus altidens	Barranco León	Europe	Spain	grass-dom.	Saarinen, J.; Cirilli, O.; Strani, F.; Meshida, K.; Bernor, R.L. Testing equid body mass estimate equations on modern zebras – with implications to understanding the relationship of body size, diet and habitats of Equus in the Pleistocene of Europe. Frontiers in Ecology and Evolution, 2021, 9, 622412
	1.4	Equus suessenbornensis	Barranco León	Europe	Spain	browse-dom.	Saarinen, J.; Cirilli, O.; Strani, F.; Meshida, K.; Bernor, R.L. Testing equid body mass estimate equations on modern zebras – with implications to understanding the relationship of body size, diet and habitats of Equus in the Pleistocene of Europe. Frontiers in Ecology and Evolution, 2021, 9, 622412
	1.45	Equus altidens	Pirro Nord	Europe	Italy	grazer	Saarinen (new)
	1.5	Equus altidens	Venta Micena	Europe	Spain	grazer	Saarinen, J.; Cirilli, O.; Strani, F.; Meshida, K.; Bernor, R.L. Testing equid body mass estimate equations on modern zebras – with implications to understanding the relationship of body size, diet and habitats of Equus in the Pleistocene of Europe. Frontiers in Ecology and Evolution, 2021, 9, 622412
Pastonian?	1.75	Equus major	East Runton	Europe	UK	mixed	Saarinen (new)	browse-dom./mixed	Rivals, F.; Lister, A.M. Dietary flexibility and niche partitioning of large herbivores through the Pleistocene of Britain. Quaternary Science Reviews 2016, 146, 116-134
Pastonian?	1.75	Equus stenonis	East Runton	Europe	UK	mixed	Saarinen (new)
	1.8	Equus stehlini	Casa Frata (Upper Valdarno Basin)	Europe	Italy
	1.8	Equus mygdoniensis	Mygdona Basin	Europe	Greece		Saarinen (new)
	1.81	Equus stenonis	Dmanisi	Europe	Georgia	grazer	Saarinen (new)
	1.81	Equus altidens	Dmanisi	Europe	Georgia	grazer	Saarinen (new)
Pre-Pastonian	1.85	Equus major	Norwich Crag	Europe	UK	browse-dom.	Saarinen (new)
	1.85	Equus stenonis	Matassino Poggiorosso (Upper Valdarno Basin)	Europe	Italy
	1.85	Equus stenonis	Matassino Solava (Upper Valdarno Basin)	Europe	Italy
	1.95	Equus stenonis	Olivola	Europe	Italy	grazer	Strani F., DeMiguel D., Sardella R., Bellucci L., 2018. Dietary response of early Pleistocene ungulate communities to the climate oscillations of the Gelasian/Calabrian transition in Central Italy. Palaeogeography, Palaeoclimatology, Palaeoecology 499, 102–111.
	2	Equus stenonis	Puebla de Valverde	Europe	Spain
	2	Equus stenonis	Sesklo	Europe	Greece	grazer	Rivals, F.; Athanassiou, A. Dietary adaptations in an ungulate community from the late pliocene of greece. Palaeogeography, Palaeoclimatology, Palaeoecology, 2008, 265, 134-139.	grazer	Rivals, F.; Athanassiou, A. Dietary adaptations in an ungulate community from the late pliocene of greece. Palaeogeography, Palaeoclimatology, Palaeoecology, 2008, 265, 134-139.
	2	Equus stenonis	Volax	Europe	Greece
	2.1	Equus stenonis	Vatera	Europe	Greece
	2.1	Equus major	Senèze	Europe	France
	2.1	Equus senezensis	Senèze	Europe	France	grazer	Saarinen (new)
	2.1	Equus senezensis	Coste San Giacomo	Europe	Italy	grass-dom.	Strani F., DeMiguel D., Sardella R., Bellucci L., 2015. Paleoenvironments and climatic changes in the Italian Peninsula during the Early Pleistocene: evidence from dental wear patterns of the ungulate community of Coste San Giacomo. Quaternary Science Reviews 121, 28–35.			grazer in open environment	Strani F., Pushkina D., Bocherens H., Bellucci L., Sardella R., DeMiguel D. 2019. Dietary Adaptations of Early and Middle Pleistocene Equids from the Anagni Basin (Frosinone, Central Italy). Frontiers in Ecology and Evolution 7, 176
	2.3	Equus major	Tegelen	Europe	Netherlands	browse-dom.	Saarinen (new)
	2.3	Equus major	Pardines	Europe	France
	2.3	Equus stenonis	Perrier	Europe	France
	2.3	Equus stenonis	Chilhac	Europe	France
	2.35	Equus stenonis	Dafnero	Europe	Greece
	2.4	Equus stenonis	Saint Vallier	Europe	France	grazer	Saarinen (new)
Pre-Ludhamian	2.5	Equus major	Red Crag	Europe	Europe	browse-dom.	Saarinen (new)
	2.5	Equus major	Montopoli	Europe	Italy
	2.5	Equus livenzovensis	Livenzovka	Europe	Russia
	2.6	Equus livenzovensis	El-Rincon 1	Europe	Spain
Late Pliocene	2.7	Proboscidipparion sp.	Red Crag	Europe	UK	mixed	Rivals, F.; Lister, A.M. Dietary flexibility and niche partitioning of large herbivores through the Pleistocene of Britain. Quaternary Science Reviews 2016, 146, 116-134, Saarinen this wolume	browse-dom.	Rivals, F.; Lister, A.M. Dietary flexibility and niche partitioning of large herbivores through the Pleistocene of Britain. Quaternary Science Reviews 2016, 146, 116-134
MN 13		Cremohipparion periafricanum	Valdecebro	Europe	Spain	grazer	Saarinen, this wolume
MN 13		Hippotherium kammerschmittae	Dorn-Dürkheim	Europe	Germany	browse-dom.	Bernor L.R., Kaiser T.M. 2006. Systematics and Paleoecology of the Earliest Pliocene Equid, Eurygnathohippus hooijeri n. sp. From Langebaanweg, South Africa. Mitt. hamb. zool. Mus. Inst. Band 103 S.149-185
MN 13		Hippotherium aff. primigenium	Dorn-Dürkheim	Europe	Germany	browse-dom.	Bernor L.R., Kaiser T.M. 2006. Systematics and Paleoecology of the Earliest Pliocene Equid, Eurygnathohippus hooijeri n. sp. From Langebaanweg, South Africa. Mitt. hamb. zool. Mus. Inst. Band 103 S.149-186
MN 12 - MN 13		Hippotherium malpassi	several localities	Europe	Italy	grass-dom.	Bernor et al. 2011
MN 12 - MN 13		Hipparionini indet.	Samos	Europe	Greece	grass-dom.	Jokela 2015
MN12		Hipparionini indet.	Pikermi	Europe	Greece	grass-dom.	Jokela 2015
MN 12		Cremohipparion moldavicum	Maragheh	Europe	Iran	mixed	Bernor et al. 2014
MN 12		Cremohipparion matthewi	Maragheh	Europe	Iran	grazer	Bernor et al. 2014
MN 12		Hipparion prostylum	Maragheh	Europe	Iran	mixed	Bernor et al. 2014
MN 12		Hipparion dietrichi	Maragheh	Europe	Iran	mixed	Bernor et al. 2014
MN 12		Hipparion campbelli	Maragheh	Europe	Iran	mixed	Bernor et al. 2014
MN 12		Hippotherium microdon	Baltavar	Europe	Hungary	mixed	Bernor L.R., Kaiser T.M. 2006. Systematics and Paleoecology of the Earliest Pliocene Equid, Eurygnathohippus hooijeri n. sp. From Langebaanweg, South Africa. Mitt. hamb. zool. Mus. Inst. Band 103 S.149-186
MN 9 - MN 10		Hippotherium sumegense	Sümeg	Europe	Hungary	browse-dom.	Bernor L.R., Kaiser T.M. 2006. Systematics and Paleoecology of the Earliest Pliocene Equid, Eurygnathohippus hooijeri n. sp. From Langebaanweg, South Africa. Mitt. hamb. zool. Mus. Inst. Band 103 S.149-187
MN 9		Hippotherium primigenium	Eppelsheim	Europe	Germany	mixed	Bernor L.R., Kaiser T.M. 2006. Systematics and Paleoecology of the Earliest Pliocene Equid, Eurygnathohippus hooijeri n. sp. From Langebaanweg, South Africa. Mitt. hamb. zool. Mus. Inst. Band 103 S.149-188
MN 9		Hippotherium primigenium	Hoewenegg	Europe	Germany	browse-dom.	Bernor L.R., Kaiser T.M. 2006. Systematics and Paleoecology of the Earliest Pliocene Equid, Eurygnathohippus hooijeri n. sp. From Langebaanweg, South Africa. Mitt. hamb. zool. Mus. Inst. Band 103 S.149-189
MN 9		Hippotherium intrans	Rudabanya	Europe	Hungary	browse-dom.	Bernor L.R., Kaiser T.M. 2006. Systematics and Paleoecology of the Earliest Pliocene Equid, Eurygnathohippus hooijeri n. sp. From Langebaanweg, South Africa. Mitt. hamb. zool. Mus. Inst. Band 103 S.149-190

## Sheet: Asia
Age		Taxa	Locality	Continent	Country	Diet
MARINE ISOTOPIC STAGE/NALMA/OTHER	Ma (mean of estimate)					MESOWEAR	Reference	MICROWEAR	Reference	ISOTOPES	Reference
present	0	Equus hemionus	Central Asia	Asia	not specified	grazer	Saarinen (new)
present	0	Equus kiang	Tibet	Asia	not specified	grazer	Saarinen (new)
present	0	Equus przewalski	Central Asia	Asia	not specified	grazer	Schulz and Kaiser 2011, Saarinen (new)
	1	Equus nalaikhaensis	Nalaikha	Asia	Siberia
	2.55	Equus eisenmannae	Longdan	Asia	China	grazer	Saarinen (new)
Pliocene (3.4 - 3 Ma)	3.2	Baryhipparion tchicoicum	Udunga	Asia	Russia	grass-dom.	Nakaya et al. 2009
7.69 - 6.2 Ma	6.95	Hipparionini sp. Unit 4	Siwaliks	Asia	Pakistan	mixed	Wolf et al. 2013
8.69 - 7.7 Ma	8.2	Hipparionini sp. Unit 3	Siwaliks	Asia	Pakistan	grass-dom.	Wolf et al. 2013
MN 10 (9.69 - 8.7 Ma)	9.2	Hipparionini sp. Unit 2	Siwaliks	Asia	Pakistan	grass-dom.	Wolf et al. 2013
MN 9 (10.7 - 9.7 Ma)	10.2	Hipparionini sp. Unit 1	Siwaliks	Asia	Pakistan	mixed	Wolf et al. 2013

## Sheet: Africa
Age		Taxa	Locality	Continent	Country	Diet
MARINE ISOTOPIC STAGE/NALMA/OTHER	Ma (mean of estimate)					MESOWEAR	Reference	MICROWEAR	Reference	ISOTOPES	Reference
present	0	Equus quagga	modern Africa	Africa	not specified	grazer	Saarinen (new)	grazer	Rivals, F.; Julien, M.-A.; Kuitems, M.; Van Kolfschoten, T.; Serangeli, J.; Drucker, D.G.; Bocherens, H.; Conard, N.J. Investigation of equid paleodiet from Schöningen 13 II-4 through dental wear and isotopic analyses: Archaeological implications. Journal of Human Evolution 2015, 89, 129-137
present	0	Equus grevyi	modern East Africa	Africa	not specified	grazer	Saarinen (new)	grazer	Rivals, F.; Julien, M.-A.; Kuitems, M.; Van Kolfschoten, T.; Serangeli, J.; Drucker, D.G.; Bocherens, H.; Conard, N.J. Investigation of equid paleodiet from Schöningen 13 II-4 through dental wear and isotopic analyses: Archaeological implications. Journal of Human Evolution 2015, 89, 129-137
present	0	Equus zebra	modern South Africa	Africa	not specified	grazer	Schulz and Kaiser 2011, Saarinen (new)
	1.47	Equus oldowayensis	TKII/OLD63	Africa	Tanzania		Saarinen (new)
	2.1	Equus koobiforensis	Koobi Fora	Africa	Kenya	grazer	Saarinen (new)
Early Pleistocene		Eurygnathohippus sp.	Makuyuni	Africa	Tanzania	grazer	Wolf et al. 2010
Early Pliocene		Eurygnathohippus woldegabrieli	Aramis	Africa	Ethiopia	grazer	Bernor et al. 2013
Early Pliocene	4	Eurygnathohippus hooijeri	Langebaanweg	Africa	South Africa	grass-dom.	Bernor L.R., Kaiser T.M. 2006. Systematics and Paleoecology of the Earliest Pliocene Equid, Eurygnathohippus hooijeri n. sp. From Langebaanweg, South Africa. Mitt. hamb. zool. Mus. Inst. Band 103 S.149-186
Late Miocene		Eurygnathohippus feibeli	several localities	Africa	Kenya/Ethiopia	grass-dom.	Melcher et al. 2014
8.5 Ma		"Cormohipparion" sp.	Chorora	Africa	Ethiopia	browse-dom.	Bernor et al. 2004
