# Supplementary material for: Evolution of the Family Equidae, Subfamily Equinae, in North, Central and South America, Eurasia and Africa during the Plio-Pleistocene
Source: Biology (Basel). 2022 Aug 24;11(9):1258. doi: 10.3390/biology11091258 (PMC9495906; doi:10.3390/biology11091258)
Supplement: Supplementary file 1 [file biology-11-01258-s001.zip › Supplementary Table S4. Taxa coded on the MeanHYP maps.xlsx]

## Sheet: time
Numeber codes Genus	Number Codes species per genus	Number Codes species by age	Genus	Species	Age Biochronology	Biochronology Groups	MAX AGE	MIN AGE	Age (Ma)	Distribution
1	1	1	Calippus	elaschistus	Miocene-late Hemphillian	1	10.3	4.9	10,3 - 4,9	Florida (USA)
1	2	2	Calippus	hondurensis	Miocene-Blancan	1	10.3	4.9	10,3 - 4,9	Puntarenas (Costa Rica); Guanajuato, Hidalgo, Jalisco, Zacatecas (Mexico); Honduras; Florida (USA);
2	1	3	Dinohippus	interpolatus	Hemphilian-Blancan	1	10.3	4.9	10,3 - 4,9	Hidalgo, Zacatecas (Mexico), California, Kansas, New Mexico, Texas,
2	2	4	Dinohippus	leardi	miocene-hemphilian	1	10.3	4.9	10,3 - 4,9	California (USA)
2	3	5	Dinohippus	leydianus	Hemphillian- Blancan	1	10.3	4.9	10,3 - 4,9	Alberta (Canada); Arizona, California, Kansas, Nebraska, Oklahoma (USA)
2	4	6	Dinohippus	spectans	Miocene-late Hemphillian	1	10.3	5.3	10,3 - 5,3	California, Idaho, Nevada, Oregon, Texas (USA)
3	1	7	Cormohipparion	occidentale	Hemphillian-Blancan	1	10.3	4.9	10,3 - 4,9	California, Florida, Nebraska, New Mexico, Oklahma (USA)
4	1	8	Nannippus	aztecus	Hemphillian-Blancan	1	10.3	4.9	10,3 - 4,9	Chihuahua, Guanajuato, Jalisco (Mexico); Alabama, Florida, Louisiana, Mississipi, Oklahoma, Texas (USA)
4	2	9	Nannippus	lenticularis	Hemphillian-Blancan	1	10.3	4.9	10,3 - 4,9	Alberta (Canada); Alabama, Kansas, Nebraska, Oklahoma, Texas (USA)
4	3	10	Nannippus	peninsulatus	Hemphillian-Blancan	1	10.3	4.9	10,3 - 4,9	Guanajuato, Hidalgo, Jalisco, Michoacan(Mexico); Arizona, Florida, Kansas, Nebraska, New Mexico, Texas (USA)
5	1	11	Neohipparion	leptode	Hemphillian - Blancan	1	10.3	4.9	10,3 - 4,9	California, Kansas, Nebraska, Nevada, Oklahoma, Oregon (USA)
6	1	12	Astrohippus	ansae	Hemphillian-Blancan	1	10	4.9	10,3 - 4,9	Zacatecas (Mexico), New Mexico, Oklahoma, Texas (USA)
6	2	13	Astrohippus	stockii	Hemphillian-Blancan	1	10	5.3	10,3 - 5,3	Chihuahua, Guanajuato, Jalisco, Mexico; New Mexico, Florida, Texas (USA)
7	1	14	Boreohippidion	galushai	Late Hemphillian	1	7	5.3	7,0 - 5,3	Arizona (USA)
8	1	15	Plesiohipparion	longipes	MN13-MN15	1.2	7	4	7,0 - 4,0	Kazhakstan (Pavlodar); Turkey (Akkasdagi and Calta); United Arab Emirates (Baynunah)
9	1	16	Cremohipparion	periafricanum		1	6.8	4	6,8 - 4,0	Spain (Valdecebro); Libya (Sahabi); Morocco (Tizi N'Tadderth)
10	1	17	Eurygnathohippus	feibeli		1	6.8	4	6,8 - 4,0	Libya (Sahabi); Kenya (Lothagam)
11	1	18	Sivalhippus	turkanensis		1	6.5	4	6,5 - 4,0	Kenya (Lothagam)
8	2	19	Plesiohipparion	houfenense	MN 13-MN15	1.2	6	3.55	6,0 - 3,55	Mongolia (Khunuk Formation, Kholobolchi Nor); China (Yushe Basin)
12	1	20	Proboscidipparion	pater	MN 14-MN15	1.2	5.33	3.55	5,33 - 3,55	China (Yushe Basin)
12	2	21	Proboscidipparion	crassum	MN14-MN16a	1.2	5.33	2.7	5,33,0- 2,7	France (Perpignan, Montpellier); Bulgaria (Dorkovo); England (Reg Crag)
2	5	22	Dinohippus	mexicanus	Hemphillian - Blancan	1	5.3	4.6	5,3,0 - 4,6	Chihuahua, Guanajuato, Jalisco, Hidalgo, Nayarit (Mexico); California, Florida, New Mexico, Texas, (USA)
3	2	23	Cormohipparion	emsliei	Latest Hemphillian - Blancan	1	5.3	4.6	5,3,0 - 4,6	Alabama, Florida, Louisiana (USA)
9	2	24	Cremohipparion	fissurae	MN14-MN15	1.2	5.3	3	5,3,0 - 3,3	Spain (Layna, Puerto de la Cadena, Orrios)
13	1	25	Pliohippus	coalingensis	Pliocene	1.2	5.3	2.58	5,3 - 2,58	California (USA)
5	1	26	Neohipparion	eurystyle	Hemphillian-Blancan	1	5.3	4.6	5,3 - 4,6	Alberta (Canada); Hidalgo, Zacatecas (Mexico); Alabama, California, Florida, Kansas, Nebraska, Oklahoma, Texas
5	2	27	Neohipparion	gidleyi	late Hemphiliam	1	5.3	4.9	5,3 - 4,9	California, Oklahoma (USA)
14	1	28	Pseudhipparion	simpsoni	Latest Hemphillian	1	5.3	4.6	5,3 - 4,6	Florida, Kansas, Oklahoma, Texas (USA)
8	3	29	Plesiohipparion	huangheense	MN 15-16	1.2	5	2.6	3,6 - 2,6	China (Yushe Basin); India (Tatrot); Turkey (Guliyazi)
10	2	30	Eurygnathohippus	hooijeri		1	5	5	5	South Africa (Langebaanweg E Quarry)
4	4	31	Nannippus	beckensis	Blancan	1,2,3	4.9	1.8	4,9 - 1,8	Texas (USA)
15	1	32	Equus/Plesippus	simplicidens	Blancan - Irvingtonian	1,2,3,4	4.9	0.15	4,9 - 0,15	Mexico (Baja California); USA (Arizona, California, Idaho, Kansas, Nebraska, Texas)
15	2	33	Equus	cumminsi	Blancan - early Irvingtonian	1,2,3,4	4.9	0.85	4,9 - 0,85	USA (Kansas, Texas)
15	3	34	Equus	enormis	early Pliocene - middle Pleistocene	1	4.9	4.9	4.9	USA (California)
15	4	35	Equus/Plesippus	idahoensis	Blancan - early Irvingtonian	1,2,3,4	4.9	0.01	4,9 - 9,5 ka	USA (Arizona, California, Idaho, Nevada)
10	3	36	Eurygnathohippus	woldegabrieli		1	4.4	4.2	4,4 - 4,2	Ethiopia (Aramis, Middle Awash)
8	4	37	Plesiohipparion	sp.	Early Pliocene (4 - 3.5 Ma)	2	4	3.5	4,0 - 3,5	Ellesmere Island, Canada
9	3	38	Cremohipparion	licenti	MN15	2	4	4	4	China (Yushe Basin)
12	3	39	Proboscidipparion	heintzi	MN15	2	4	4	4	Turkey (Calta)
10	4	40	Eurygnathohippus	afarensis		2	3.8	3.2	3,8 - 3,2	Ethiopia (Kada Hadar Member)
10	5	41	Eurygnathohippus	hasumense		2	3.8	3.2	3,8 - 3,2	Kenya (Kubi Algi Formation)
10	6	42	Eurygnathihippus	sp.	MN 15-16	2	3.6	2.6	3,6 - 2,6	Africa, India
16	1	43	"Hippotherium"	antelopinum	MN 15-16	2	3.6	2.6	3,6 - 2,6	Siwalik Hills
17	1	44	Baryhipparion	insperatum	MN16a-MNQ17	2.3	3.55	1.8	3,55 - 1,8	China (Yushe Basin)
8	5	45	Plesiohipparion	rocinantis	MN15-MN16b	2	3.3	2.6	3,3 - 2,6	Spain (La Puebla de Almoradier, Las Higuerelas, Villaroya); France (Roca- Neyra); England (Red Crag) Georgia (Kvabebi)
9	4	46	Cremohipparion	sp.	MN16b	2	2.6	2.58	2,6 - 2,58	Italy (Montopoli)
10	7	47	Eurygnathohippus	cornelianus		2.3	2.6	1	2,6 - 1,0	Tanzania (Olduvai)
15	5	48	Equus	livenzovensis	MN16b	2.3	2.6	2	2,6 - 2,0	Russia (Liventsovka); France (Roca-Neyra); Italy (Montopoli); Spain (El Rincon, Huelago). Possibly Romania (Grăunceau) and Spain (Fonelas).
15	6	49	Equus	major	MN16-17	2.3	2.6	2	2,6 - 2,0	France (Chagny, Pardines, Le Coupet, Senèze, Blassac la Gironde); The Netherlands (Telegen); Germany (Schernfeld); England (East Runton, Norfolk); Russia (Liventsovka); Romania (Malusteni, Oasele).
15	7	50	Equus	sivalensis	MN 17-MQ 3B	2.3	2.6	2.2	2,6 - 2,2	Siwalik Hills
15	8	51	Equus	eisenmannae		2.3	2.55	1.86	2,55 - 1,86	China (Longdan, Dongxiang County, Gansu)
8	6	52	Plesiohipparion	shanxiense	MNQ17	3	2.5	1.8	2,5,0 1,8	China (Hsi Chwang, Shanxi)
10	8	53	Eurygnathohippus	pomeli		3	2.5	2.5	2.5	Morocco (Ahl al Oughlam)
12	4	54	Proboscidipparion	sinense	MN17-MQ1	3.4	2.5	1	2,5 - 1	China (Henan Province)
15	9	55	Equus	sanmeniensis		3.4	2.5	0.8	2,5 - 0,8	North and Northwestern China, Siberia and probably Tajikistan
15	10	56	Equus	huanghoensis		3	2.5	1.6	2,5 - 1,6	China (Nihewan, Hebei; Linyi, Shanxi; Sanmenxia, Pinglu, Shanxi; Xunyi, Shaanxi; Nanjing, Jiangsu)
15	11	57	Equus	yunnanensis		3.4	2.5	0.01	2,5 - 0,01	China (Yuanmou, Yunnan; Liucheng, Guangxi; Jianshi and Enshi, Hubei; Hanzhong, Shaanxi; Huili, Sichuan); Myanmar (Irawaddy)
15	12	58	Equus	calobatus	late Blancan - early Rancholabrean	3.4	2.5	0.01	2,5 - 0,01	Canada (Alberta); Mexico (Aguascalientes); USA (Colorado; Kansas, Nebraska, New Mexico, Oklahoma, Texas)
15	13	59	Equus	scotti	late Blancan - Rancholabrean	3.4	2.5	0.01	2,5 - 0,01	Canada (Alberta, Ontario, Saskatchewan, Yukon); USA (California, Florida, Idaho, Kansas, Nebraska, New Mexico, Oklahoma, Texas)
15	14	60	Equus	stenonis anguinus	late Blancan	3	2.5	1.72	2,5 - 1,72 Ma	USA (Arizona, Idaho)
15	15	61	Equus	stenonis	MN17-18	3	2.45	1.6	2,45 - 1,6	France (Saint Vallier, Chilhac); Spain (La Puebla de Valverde); Italy (Pantalla, Upper Valdarno Basin); Greece (Sesklo, Dafnerò, Vatera, Volax, Gerakarou); Turkey (Gulyazi); Georgia (Dmanisi). Possibly Italy (Farneta, Pirro Nord); France (Ceyssaguet).
15	16	62	Equus	numidicus		3.4	2.44	1.2	2,44 - 1,2	North Africa (Ain Boucherit)
15	17	63	Equus	tabeti		3.4	2.44	1.2	2,44 - 1,2	North Africa (Ain Boucherit, Ain Hanech, El Kerba)
15	18	64	Equus	sp.		3, 4	2.33	2.33	2.33	Ethiopia
15	19	65	Equus	senezensis	MN18	3	2.2	2	2,2 - 2,0	France (Senèze), Italy (Coste San Giacomo). Possibly Italy (Montecarlo, Upper Valdarno Basin)
15	20	66	Equus	sp. (small)	MN 17-MQ 2	3.4	2.2	1.2	~2,2-~1,2	Siwalik Hills
15	21	67	Equus	qingyangensis		3.4	2.1	1.2	2,1 - 1,2	Northwestern and northern China
15	22	68	Equus	koobiforensis		3.4	2.1	1	2,1 - ?1,0	Kenya, Tanzania
15	23	69	Equus	teilhardi		3.4	2	1	2,0 - 1,0	North and Northwestern China; Qixian, Shanxi;
15	24	70	Equus	wangi		3.4	2	1	2,0 - 1,0	China (Qingyang, Gansu)
15	25	71	Equus	pamirensis	MNQ17	3	2	2	2,2 - 2,0	Tajikistan (Kuruksai)
15	26	72	Equus	capensis		3.4	2	0.1	?2,0 - ?0,1	South Africa
15	27	73	Equus	stehlini	MN18	3	1.9	1.78	1,9 - 1,78	Italy (Upper Valdarno Basin, Frattaguida). Possibly Greece (Pyrgos).
15	28	74	Equus	conversidens	Irvingtonian - Rancholabrean	3.4	1.9	0.01	1,9 - 0,01	Canada (Alberta); Mexico (Aguascalientes, Chapala, Chiapas, Hidadlgo, Jalisco, Michoacán, Nuevo Leon, Puebla, Oaxaca, San Luis Potosi, Sonora, Estado de Mexico, Tlaxcala, Yukatan, Zacatecas); USA (Arizona, California, Florida, Kansas, Nebraska, New Mexico, Oklahoma, Texas, Wyoming)
15	29	75	Equus	lambei	Irvingtonian – Rancholabrean	3.4	1.9	0.01	1,9 - 0,01	Canada (Alberta, Yukon); USA (Alaska, California, Iowa, Kansas, Nebraska, New Mexico, Texas, Wyoming)
15	30	76	Equus/ Haringtonhippus	francisci	Irvingtonian - Rancholabrean	3.4	1.9	0.01	1,9 - 0,01	Canada (Yukon); Mexico (Aguascalientes, Estado de Mexico, Jalisco, Puebla, Sonora, Zacatecas); USA (Alaska, Arizona, Florida, Kansas, Nebraska, New Mexico, Texas, Wyoming)
15	31	77	Equus	fraternus	Irvingtonian - Rancholabrean	3.4	1.9	0.01	1,9 - 0,01	Canada (Alberta); USA (Florida, Illinois, Mississipi, Nebraska, Pennsylvania, South Carolina, Texas)
15	32	78	Equus	pseudaltidens	?Irvingtonian - Rancholabrean (Sangamon Interglacial)	3.4	1.9	0.01	1,9 - 0,01	USA (Texas, ?Florida)
15	33	79	Equus	oldowayensis		3.4	1.9	1	1,9 - 1,0	Kenya, Tanzania
15	34	80	Equus	altidens	MN18-20	3.4	1.8	0.7	1,8 - 0,7	Georgia (Dmanisi), Greece (Gerakarou, Libakos, Polylakkos); Italy (Farneta, Pirro Nord, Slivia, Ponte Galeria, Venosa Loreto); France (Seinzelles, Solihac); Spain (Venta Micena, Barranco Leon, Fuente Nueva 3, Vallparadis, Huescar 1, Cullar de Baza 1, Atapuerca Gran Dolina); Germany (Sussenborn); England (Pakefield). Possibly Italy (Notarchirico).
15	35	81	Equus	zebra		3.4	1.8	0	?1,8 - recent	South Africa, Namibia, Angola
15	36	82	Equus	suessenbornensis	MN18-20	4	1.5	0.7	1,5 - 0,7	Georgia (Akhalkalaki); Moldavia (Tiraspol); Czech Republic (Stranska Skala); Italy (Slivia, Bucine, Monte Tenda, Venosa Loreto); France (Solihac, Ceyssaguet); Spain (Barranco Leon 1, Fuente Nueva3, Cueva Victoria, Huescar 1, Cullar de Baza 1); England (Cromer Forest); Germany (Sussenborn, Voigtstedt). Possibly Italy (Farneta, Pirro Nord).
15	37	83	Equus	apolloniensis	MN19-20	4	1.2	0.9	1,2 - 0,9	Greece (Apollonia, Platanochori-1). Possibly Greece (Tsiotra Vryssi), Turkey (Denzeli).
15	38	84	Equus	africanus		4	1.2	0	1,2 - recent	East Africa
15	39	85	Equus	wuesti	early Middle Pleistocene	4	1.1	0.9	1,1 - 0,9	Germany (Untermassfeld)
15	40	86	Equus	nalaikensis		4	1	0.7	1,1 - 0,7,0	Mongolia (Nalajkha)
15	41	87	Equus	colimensis		4	1	1	1	Russia (Bolshaja Chukochya, Kolyma lowland, northeast Yakutia, Siberia)
15	42	88	Equus	hipparionoides	MN20	4	1	0.78	1,0 - 0,78	Georgia (Akhalkalaki)
15	43	89	Equus	mauritanicus		4	1	1	1	North Africa (Tighenif)
15	44	90	Equus	neogeus		4	1 - 0,8	0.01	1 / 0,8 - 0,01	South America, several localities
15	45	91	Equus	marxi	early Middle Pleistocene	4	0.7	0.7	0.7	Germany (Sussenborn)
15	46	92	Equus	ferus	Middle Pleistocene	4	0.7	0	0,7 - 0,01	Europe
15	47	93	Equus	lenensis	Middle Pleistocene	4	0.7	0.1	0,7 - 0,1	Russia (Bolshaja Chukochya, Kolyma lowland, northeast Yakutia, Siberia)
15	48	94	Equus	verae	Middle Pleistocene -Rancholabrean	4	0.7	0.01	0,7 - 0,01	Canada (Yukon)
15	49	95	Equus	hydruntinus	Middle Pleistocene	4	0.6	0	0,6 - 0,0	Spain (Vallparadìs, Atapuerca Gran Dolina, Galeria); Italy (Vitinia, Grotta Romanelli, Tana delle Iene); France (Lunel Viel, d'Abbeville); Germany (Schoningen, Steinheim); England (Swanscombe)
18	1	96	Hippidion	devillei	Middle - Late Pleistocene	4	0.6	0.01	0,6,0 - 0,01	Argentina (Uquia, Buenos Aires); Bolivia (Tarija); Perù (Andes)
15	50	97	Equus	grevyi		4	0.5	0	0,5 - recent	East Africa
15	51	98	Equus	petralonensis	Middle Pleistocene	4	0.4	0.4	0,4 (approximate age)	Greece (Petralona Cave)
15	52	99	Equus	beijingensis		4	0.4	0.2	late Middle Pleistocene	China (Loc. 21 Zhoukoudian)
15	53	100	Equus	graziosii	Middle Pleistocene	4	0.2	0.2	MIS 6	Italy (Maspino)
15	54	101	Equus	namadicus	MQ 4	4	0.2	0.015	~0,2 - 0,015	Peninsular India
15	55	102	Equus	cedralensis	Rancholabrean	4	0.15	0.01	0,15 - 0,01	Mexico (Aguascalientes, Chihuahua, Estado de Mexico, Michoacán, Puebla, San Luis Potosí)
15	56	103	Equus	mexicanus	Rancholabrean	4	0.15	0.01	0,15 - 0,01	Mexico (Aguascalientes, Chiapas, Estado de Mexico, Jalisco, Michoacán, Oaxaca, Puebla, San Luis Potosi, Zacatecas, Zumpago, ); USA (California, Oregon, Texas)
15	57	104	Equus	occidentalis	Rancholabrean	4	0.15	0.01	0,15 - 0,01	Mexico (Baja California, Sonora); USA (Arizona, California, Nevada, New Mexico, Oregon)
18	2	105	Hippidion	saldiasi	Late Pleistocene	4	0.012	0.01	0,012 - 0,01	Argentina (Patagonia, Cerro Bombero); Chile (Patagoia, Atacama desert, Lago Sofia)
18	3	106	Hippidion	principale	Lujanian	4	0.1	0.01	0,1 - 0,01	Argentina, Bolivia, Brazil and Uruguay
15	58	107	Equus	melkiensis		4	0.13	0.01	Late Pleistocene	Algeria (Allobroges)
15	59	108	Equus	algericus		4	0.13	0.01	Late Pleistocene	Algeria (Allobroges)
15	60	109	Equus	dalianensis		4	0.12	0.01	Late Pleistocene	China (Zhaogong, Haerbin, Heilongjiang province)
15	61	110	Equus	quagga		4	0.1	0	?1,0 - recent	East and South Africa
15	62	111	Equus	ovodovi		4	0.04	0.01	0,04 - 0,01	China (Zhaogong, Haerbin, Heilongjiang province)
15	63	112	Equus	hemionus	MQ 4	4	0.03	0	0,03-0,0	Peninsular India, China, Mongolia
15	64	113	Equus	kiang		4	0	0	0	China, Nepal
15	65	114	Equus	przewalskii		4	0	0	0	China (Tonghe, Heilongjiang province; Mongolia)

## Sheet: genera
Numeber codes Genus	Number Codes species per genus	Number Codes species by age	Genus	Species	Age MN	Age Groups	MAX AGE	MIN AGE	Age (Ma)	Distribution
1	1	1	Calippus	elaschistus	Miocene-late Hemphillian	1	10.3	4.9		Florida (USA)
1	2	2	Calippus	hondurensis	Miocene-Blancan	1	10.3	4.9		Puntarenas (Costa Rica); Guanajuato, Hidalgo, Jalisco, Zacatecas (Mexico); Honduras; Florida (USA);
2	1	3	Dinohippus	interpolatus	Hemphilian-Blancan	1	10.3	4.9		Hidalgo, Zacatecas (Mexico), California, Kansas, New Mexico, Texas,
2	2	4	Dinohippus	leardi	miocene-hemphilian	1	10.3	4.9		California (USA)
2	3	5	Dinohippus	leydianus	Hemphillian- Blancan	1	10.3	4.9		Alberta (Canada); Arizona, California, Kansas, Nebraska, Oklahoma (USA)
2	4	6	Dinohippus	spectans	Miocene-late Hemphillian	1	10.3	5.3		California, Idaho, Nevada, Oregon, Texas (USA)
2	5	22	Dinohippus	mexicanus	Hemphillian - Blancan	1	5.3	4.6		Chihuahua, Guanajuato, Jalisco, Hidalgo, Nayarit (Mexico); California, Florida, New Mexico, Texas, (USA)
3	1	7	Cormohipparion	occidentale	Hemphillian-Blancan	1	10.3	4.9		California, Florida, Nebraska, New Mexico, Oklahma (USA)
3	2	23	Cormohipparion	emsliei	Latest Hemphillian - Blancan	1	5.3	4.6		Alabama, Florida, Louisiana (USA)
4	1	8	Nannippus	aztecus	Hemphillian-Blancan	1	10.3	4.9		Chihuahua, Guanajuato, Jalisco (Mexico); Alabama, Florida, Louisiana, Mississipi, Oklahoma, Texas (USA)
4	2	9	Nannippus	lenticularis	Hemphillian-Blancan	1	10.3	4.9		Alberta (Canada); Alabama, Kansas, Nebraska, Oklahoma, Texas (USA)
4	3	10	Nannippus	peninsulatus	Hemphillian-Blancan	1	10.3	4.9		Guanajuato, Hidalgo, Jalisco, Michoacan(Mexico); Arizona, Florida, Kansas, Nebraska, New Mexico, Texas (USA)
4	4	31	Nannippus	beckensis	Blancan	1,2,3	4.9	1.8		Texas (USA)
5	1	11	Neohipparion	leptode	Hemphillian - Blancan	1	10.3	4.9		California, Kansas, Nebraska, Nevada, Oklahoma, Oregon (USA)
5	1	26	Neohipparion	eurystyle	Hemphillian-Blancan	1	5.3	4.6		Alberta (Canada); Hidalgo, Zacatecas (Mexico); Alabama, California, Florida, Kansas, Nebraska, Oklahoma, Texas
5	2	27	Neohipparion	gidleyi	late Hemphiliam	1	5.3	4.9		California, Oklahoma (USA)
6	1	12	Astrohippus	ansae	Hemphillian-Blancan	1	10	4.9		Zacatecas (Mexico), New Mexico, Oklahoma, Texas (USA)
6	2	13	Astrohippus	stockii	Hemphillian-Blancan	1	10	5.3		Chihuahua, Guanajuato, Jalisco, Mexico; New Mexico, Florida, Texas (USA)
7	1	14	Boreohippidion	galushai	Late Hemphillian	1	7	5.3		Arizona (USA)
8	1	15	Plesiohipparion	longipes	MN13-MN15	1	7	3
8	2	19	Plesiohipparion	houfenense	MN 13-MN15	1	6	3.55
8	3	29	Plesiohipparion	huangheense	MN 15-16	1	5	2.6	3.6-2.6	India, Turkey, China
8	4	37	Plesiohipparion	sp.	Early Pliocene (4 - 3.5 Ma)	2	4	3.5		Ellesmere Island, Canada
8	5	44	Plesiohipparion	rocinantis	MN15-MN16b	2	3.3	2.6
8	6	51	Plesiohipparion	shanxiense	MNQ17	3	2.5	1.8
9	1	16	Cremohipparion	periafricanum		1	6.8	4
9	2	24	Cremohipparion	fissurae	MN14-MN15	1	5.3	3
9	3	38	Cremohipparion	licenti	MN15	2	4	4
9	4	45	Cremohipparion	sp.	MN16b	2	2.6	2.58
10	1	17	Eurygnathohippus	feibeli		1	6.8	4
10	2	30	Eurygnathohippus	hooijeri		1	5	5
10	3	36	Eurygnathohippus	woldegabrieli		1	4.4	4.2
10	4	40	Eurygnathohippus	afarensis		2	3.8	3.2
10	5	41	Eurygnathihippus	sp.	MN 15-16	2	3.6	2.6	3.6-2.6	Africa, India
10	6	46	Eurygnathohippus	cornelianus		2.3	2.6	1
10	7	52	Eurygnathohippus	pomeli		3	2.5	2.5
11	1	18	Sivalhippus	turkanensis		1	6.5	4
12	1	20	Proboscidipparion	pater	MN 14-MN15	1	5.33	3.55
12	2	21	Proboscidipparion	crassum	MN14-MN16a	1	5.33	2.7
12	3	39	Proboscidipparion	heintzi	MN15	2	4	4
12	4	53	Proboscidipparion	sinense	MN17-MQ1	3.4	2.5	1
13	1	25	Pliohippus	coalingensis	Pliocene	1.2	5.3	2.58		California (USA)
14	1	28	Pseudhipparion	simpsoni	Latest Hemphillian	1	5.3	4.6		Florida, Kansas, Oklahoma, Texas (USA)
15	3	34	Equus	enormis	early Pliocene - middle Pleistocene	1	4.9	4.9	4.9 Ma	USA (California)
15	5	47	Equus	livenzovensis	MN16b	2	2.6	2	2.6 - 2.0	Russia (Liventsovka); France (Roca-Neyra); Italy (Montopoli); Spain (El Rincon, Huelago). Possibly Romania (Grăunceau) and Spain (Fonelas).
15	6	48	Equus	major	MN16-17	2	2.6	2	2.6 - 2.0	France (Chagny, Pardines, Le Coupet, Senèze, Blassac la Gironde); The Netherlands (Telegen); Germany (Schernfeld); England (East Runton, Norfolk); Russia (Liventsovka); Romania (Malusteni, Oasele).
15	8	50	Equus	eisenmannae		2.3	2.55	1.86	2.55 - 1.86	China (Longdan, Dongxiang County, Gansu)
15	10	55	Equus	huanghoensis		3	2.5	1.6	2.5 - 1.6	China (Nihewan, Hebei; Linyi, Shanxi; Sanmenxia, Pinglu, Shanxi; Xunyi, Shaanxi; Nanjing, Jiangsu)
15	14	59	Equus	stenonis anguinus	late Blancan	3	2.5	1.72	2.5 - 1.72 Ma	USA (Arizona, Idaho)
15	15	60	Equus	stenonis	MN17-18	3	2.45	1.6	2.45 - 1.6	France (Saint Vallier, Chilhac); Spain (La Puebla de Valverde); Italy (Pantalla, Upper Valdarno Basin); Greece (Sesklo, Dafnerò, Vatera, Volax, Gerakarou); Turkey (Gulyazi); Georgia (Dmanisi). Possibly Italy (Farneta, Pirro Nord); France (Ceyssaguet).
15	19	64	Equus	senezensis	MN18	3	2.2	2	2.2 - 2.0	France (Senèze), Italy (Coste San Giacomo). Possibly Italy (Montecarlo, Upper Valdarno Basin)
15	25	70	Equus	pamirensis	MNQ17	3	2	2
15	27	72	Equus	stehlini	MN18	3	1.9	1.78	1.9 - 1.78	Italy (Upper Valdarno Basin, Frattaguida). Possibly Greece (Pyrgos).
15	9	54	Equus	sanmeniensis		3.4	2.5	0.8	2.5 - 0.8	North and Northwestern China, Siberia and probably Tajikistan
15	11	56	Equus	yunnanensis		3.4	2.5	0.01	2.5 - 0.01	China (Yuanmou, Yunnan; Liucheng, Guangxi; Jianshi and Enshi, Hubei; Hanzhong, Shaanxi; Huili, Sichuan); Myanmar (Irawaddy)
15	12	57	Equus	calobatus	late Blancan - early Rancholabrean	3.4	2.5	0.01	2.5 Ma - 9.5 ka	Canada (Alberta); Mexico (Aguascalientes); USA (Colorado; Kansas, Nebraska, New Mexico, Oklahoma, Texas)
15	13	58	Equus	scotti	late Blancan - Rancholabrean	3.4	2.5	0.01	2.5 Ma - 9.5 ka	Canada (Alberta, Ontario, Saskatchewan, Yukon); USA (California, Florida, Idaho, Kansas, Nebraska, New Mexico, Oklahoma, Texas)
15	16	61	Equus	numidicus		3.4	2.44	1.2	2.44-1.2	North Africa (Ain Boucherit)
15	17	62	Equus	tabeti		3.4	2.44	1.2	2.44-1.2	North Africa (Ain Boucherit, Ain Hanech, El Kerba)
15	20	65	Equus	sp. (small)	MN 17-MQ 2	3.4	2.2	1.2	~2.2-~1.2	Siwalik Hills
15	21	66	Equus	qingyangensis		3.4	2.1	1.2	2.1 - 1.2	Northwestern and northern China
15	22	67	Equus	koobiforensis		3.4	2.1	1	2.1-?1.0	Kenya, Tanzania
15	23	68	Equus	teilhardi		3.4	2	1	2.0 - 1.0	North and Northwestern China; Qixian, Shanxi;
15	24	69	Equus	wangi		3.4	2	1	2.0 - 1.0	China (Qingyang, Gansu)
15	26	71	Equus	capensis		3.4	2	0.1	2.0-?	South Africa
15	28	73	Equus	conversidens	Irvingtonian - Rancholabrean	3.4	1.9	0.01	1.9 Ma - 9.5 ka	Canada (Alberta); Mexico (Aguascalientes, Chapala, Chiapas, Hidadlgo, Jalisco, Michoacán, Nuevo Leon, Puebla, Oaxaca, San Luis Potosi, Sonora, Estado de Mexico, Tlaxcala, Yukatan, Zacatecas); USA (Arizona, California, Florida, Kansas, Nebraska, New Mexico, Oklahoma, Texas, Wyoming)
15	29	74	Equus	lambei	Irvingtonian – Rancholabrean	3.4	1.9	0.01	1.9 Ma - 9.5 ka	Canada (Alberta, Yukon); USA (Alaska, California, Iowa, Kansas, Nebraska, New Mexico, Texas, Wyoming)
15	30	75	Equus/ Haringtonhippus	francisci	Irvingtonian - Rancholabrean	3.4	1.9	0.01	1.9 Ma - 9.5 ka	Canada (Yukon); Mexico (Aguascalientes, Estado de Mexico, Jalisco, Puebla, Sonora, Zacatecas); USA (Alaska, Arizona, Florida, Kansas, Nebraska, New Mexico, Texas, Wyoming)
15	31	76	Equus	fraternus	Irvingtonian - Rancholabrean	3.4	1.9	0.01	1.9 Ma - 9.5 ka	Canada (Alberta); USA (Florida, Illinois, Mississipi, Nebraska, Pennsylvania, South Carolina, Texas)
15	32	77	Equus	pseudaltidens	?Irvingtonian - Rancholabrean (Sangamon Interglacial)	3.4	1.9	0.01	1.9 Ma - 9.5 ka	USA (Texas, ?Florida)
15	33	78	Equus	oldowayensis		3.4	1.9	1	1.9-1.0	Kenya, Tanzania
15	34	79	Equus	altidens	MN18-20	3.4	1.8	0.7	1.8 - 0.7	Georgia (Dmanisi), Greece (Gerakarou, Libakos, Polylakkos); Italy (Farneta, Pirro Nord, Slivia, Ponte Galeria, Venosa Loreto); France (Seinzelles, Solihac); Spain (Venta Micena, Barranco Leon, Fuente Nueva 3, Vallparadis, Huescar 1, Cullar de Baza 1, Atapuerca Gran Dolina); Germany (Sussenborn); England (Pakefield). Possibly Italy (Notarchirico).
15	35	80	Equus	zebra		3.4	1.8	0	?Middle Pleistocene - recent	South Africa, Namibia, Angola
15	36	81	Equus	suessenbornensis	MN18-20	4	1.5	0.7	1.5 - 0.7	Georgia (Akhalkalaki); Moldavia (Tiraspol); Czech Republic (Stranska Skala); Italy (Slivia, Bucine, Monte Tenda, Venosa Loreto); France (Solihac, Ceyssaguet); Spain (Barranco Leon 1, Fuente Nueva3, Cueva Victoria, Huescar 1, Cullar de Baza 1); England (Cromer Forest); Germany (Sussenborn, Voigtstedt). Possibly Italy (Farneta, Pirro Nord).
15	37	82	Equus	apolloniensis	MN19-20	4	1.2	0.9	1.2 - 0.9	Greece (Apollonia, Platanochori-1). Possibly Greece (Tsiotra Vryssi), Turkey (Denzeli).
15	38	83	Equus	africanus		4	1.2	0	1.2 - recent	East Africa
15	39	84	Equus	wuesti	early Middle Pleistocene	4	1.1	0.9	1.1 - 0.9	Germany (Untermassfeld)
15	40	85	Equus	nalaikensis		4	1	0.7
15	41	86	Equus	colimensis		4	1	1
15	42	87	Equus	hipparionoides	MN20	4	1	0.78	1.0 - 0.78	Georgia (Akhalkalaki)
15	43	88	Equus	mauritanicus		4	1	1	1.0	North Africa (Tighenif)
15	44	89	Equus	marxi	early Middle Pleistocene	4	0.7	0.7	0.7	Germany (Sussenborn)
15	45	90	Equus	ferus	Middle Pleistocene	4	0.7	0	0.7 - 0.0	Many sites from all over Europe. I will focus the discussion here on the possible species or subpecies of Equus ferus mosbachensis, E. ferus tautavelensis, E. ferus campdepeyri, E. ferus micoquii, E. ferus palustris, Equus steinheimensis, Equus torralbae, Equus achenheimensis, E. ferus taubachensis, E. ferus piveteaui, E. ferus germanicus, E. ferus antunesi, E. ferus gallicus, E. ferus latipes, E…
15	46	91	Equus	lenensis	Middle Pleistocene	4	0.7	0.1
15	47	92	Equus	verae	Middle Pleistocene -Rancholabrean	4	0.7	0.01	- 9.5 ka	Canada (Yukon)
15	48	93	Equus	hydruntinus	Middle Pleistocene	4	0.6	0	0.6 - 0.0	Spain (Vallparadìs, Atapuerca Gran Dolina, Galeria); Italy (Vitinia, Grotta Romanelli, Tana delle Iene); France (Lunel Viel, d'Abbeville); Germany (Schoningen, Steinheim); England (Swanscombe)
15	49	94	Equus	grevyi		4	0.5	0	0.5 - recent	East Africa
15	50	95	Equus	petralonensis	Middle Pleistocene	4	0.4	0.4	0.4 (Very approximal ages)	Greece (Petralona Cave)
15	51	96	Equus	beijingensis		4	0.4	0.2	late Middle Pleistocene	China (Loc. 21 Zhoukoudian)
15	52	97	Equus	graziosii	Middle Pleistocene	4	0.2	0.2	MIS 6	Italy (Maspino)
15	53	98	Equus	namadicus	MQ 4	4	0.2	0.015	~0.2-0.015	Peninsular India
15	54	99	Equus	cedralensis	Rancholabrean	4	0.15	0.01	0.15 Ma - 9.5 ka	Mexico (Aguascalientes, Chihuahua, Estado de Mexico, Michoacán, Puebla, San Luis Potosí)
15	55	100	Equus	mexicanus	Rancholabrean	4	0.15	0.01	0.15 Ma - 9.5 ka	Mexico (Aguascalientes, Chiapas, Estado de Mexico, Jalisco, Michoacán, Oaxaca, Puebla, San Luis Potosi, Zacatecas, Zumpago, ); USA (California, Oregon, Texas)
15	56	101	Equus	occidentalis	Rancholabrean	4	0.15	0.01	0.15 Ma - 9.5 ka	Mexico (Baja California, Sonora); USA (Arizona, California, Nevada, New Mexico, Oregon)
15	57	102	Equus	melkiensis		4	0.13	0.01	Late Pleistocene	North Africa
15	58	103	Equus	algericus		4	0.13	0.01	Late Pleistocene	North Africa
15	59	104	Equus	dalianensis		4	0.12	0.01	Late Pleistocene	China (Zhaogong, Haerbin, Heilongjiang province)
15	60	105	Equus	quagga		4	0.1	0	?1.0 - recent	East and South Africa
15	61	106	Equus	ovodovi		4	0.04	0.01	0.04 - 0.01	China (Zhaogong, Haerbin, Heilongjiang province)
15	62	107	Equus	hemionus	MQ 4	4	0.03	0	0.03-0.0	Peninsular India, China, Mongolia
15	63	108	Equus	kiang		4	0	0	0.0	China, Nepal
15	64	109	Equus	przewalskii		4	0	0	0.0	China (Tonghe, Heilongjiang province; Mongolia)
15	1	32	Equus/Plesippus	simplicidens	Blancan - Irvingtonian	1,2,3,4	4.9	0.15	4.9 Ma - 0.15 Ma	Mexico (Baja California); USA (Arizona, California, Idaho, Kansas, Nebraska, Texas)
15	2	33	Equus	cumminsi	Blancan - early Irvingtonian	1,2,3,4	4.9	0.85	4.9 Ma - 0.85 Ma	USA (Kansas, Texas)
15	4	35	Equus/Plesippus	idahoensis	Blancan - early Irvingtonian	1,2,3,4	4.9	0.01	4.9 Ma - 9.5 ka	USA (Arizona, California, Idaho, Nevada)
15	7	49	Equus	sivalensis	MN 17-MQ 3B	2,3,4	2.6	0.6	2.6-0.6	Siwalik Hills
15	18	63	Equus	sp.		3, 4	2.33	0	2.33 I current	Ethiopia
16	1	42	"Hippotherium"	antelopinum	MN 15-16	2	3.6	2.6	3.6-2.6	Siwalik Hills
17	1	43	Baryhipparion	insperatum	MN16a-MNQ17	2.3	3.55	1.8
