# Supplementary material for: Evolution of the Family Equidae, Subfamily Equinae, in North, Central and South America, Eurasia and Africa during the Plio-Pleistocene
Source: Biology (Basel). 2022 Aug 24;11(9):1258. doi: 10.3390/biology11091258 (PMC9495906; doi:10.3390/biology11091258)
Supplement: Supplementary file 1 [file biology-11-01258-s001.zip › Supplementary Table S5. Mean Hyposodonty data.xlsx]

## Sheet: Sheet1
NAME	LAT	LONG	MAX_AGE	MIN_AGE	MEAN AGE	COUNTRY	MEAN_HYPSO	FAMILY	SUBFAMILY	GENUS	SPECIES
Mpesida	0.667	36	7	6	6.5	Kenya	1.75	Equidae		Sivalhippus	turkanense
Southern Great Basin SB48III	30.2672	-97.7639	6.88	4.91	5.895	USA	3	Equidae	Equinae	Neohipparion	eurystyle
Southern Great Basin SB48III	30.2672	-97.7639	6.88	4.91	5.895	USA	3	Equidae	Equinae	Dinohippus	interpolatus
Southern Great Basin SB60IIIA	20.5667	-103.676	6.88	4.91	5.895	Mexico	2.83	Equidae	Equinae	Astrohippus	indet.
Southern Great Basin SB48III	30.2672	-97.7639	6.88	4.91	5.895	USA	3	Equidae	Equinae	Astrohippus	ansae
Southern Great Basin SB48III	30.2672	-97.7639	6.88	4.91	5.895	USA	3	Equidae	Equinae	Cormohipparion	occidentale
Southern Great Basin SB58A	21.0833	-100.683	6.88	4.91	5.895	Mexico	2.25	Equidae	Equinae	Dinohippus	mexicanus
Southern Great Basin SB58A	21.0833	-100.683	6.88	4.91	5.895	Mexico	2.25	Equidae	Equinae	Astrohippus	stockii
Southern Great Basin SB58A	21.0833	-100.683	6.88	4.91	5.895	Mexico	2.25	Equidae	Equinae	Neohipparion	eurystyle
Southern Great Basin SB58A	21.0833	-100.683	6.88	4.91	5.895	Mexico	2.25	Equidae	Equinae	Nannippus	aztecus
Southern Great Basin SB59II	19.4333	-99.1333	6.88	4.91	5.895	Mexico	3	Equidae	Equinae	Astrohippus	stockii
Southern Great Basin SB58A	21.0833	-100.683	6.88	4.91	5.895	Mexico	2.25	Equidae	Equinae	Neohipparion	gidleyi
Southern Great Basin SB59II	19.4333	-99.1333	6.88	4.91	5.895	Mexico	3	Equidae	Equinae	Dinohippus	mexicanus
California CC41	34.7144	-118.812	6.88	4.91	5.895	USA	2.25	Equidae	Equinae	Pliohippus	indet.
California CC41	34.7144	-118.812	6.88	4.91	5.895	USA	2.25	Equidae	Equinae	Dinohippus	indet.
California CC41II	38.2553	-122.556	6.88	4.91	5.895	USA	3	Equidae	Equinae	Neohipparion	gidleyi
Southern Great Basin SB58IIA	20.5667	-103.676	6.88	4.91	5.895	Mexico	2.6	Equidae	Equinae	Nannippus	aztecus
Southern Great Basin SB58IIA	20.5667	-103.676	6.88	4.91	5.895	Mexico	2.6	Equidae	Equinae	Dinohippus	mexicanus
Southern Great Basin SB10	32.6219	-110.526	6.88	4.91	5.895	USA	2.2	Equidae	Equinae	Dinohippus	mexicanus
Southern Great Basin SB58IIA	20.5667	-103.676	6.88	4.91	5.895	Mexico	2.6	Equidae	Equinae	Neohipparion	eurystyle
Southern Great Basin SB60IIIA	20.5667	-103.676	6.88	4.91	5.895	Mexico	2.83	Equidae	Equinae	Neohipparion	indet.
Southern Great Basin SB60IIIA	20.5667	-103.676	6.88	4.91	5.895	Mexico	2.83	Equidae	Equinae	Dinohippus	indet.
Southern Great Basin SB58III	20.5667	-103.676	6.88	4.91	5.895	Mexico	3	Equidae	Equinae	Dinohippus	interpolatus
Northern Great Basin NB34II	38.7294	-119.408	6.88	4.91	5.895	USA	2.67	Equidae	Equinae	Dinohippus	indet.
Southern Great Basin SB31B	33.2175	-108.89	6.88	4.91	5.895	USA	3	Equidae	Equinae	Dinohippus	indet.
Central Great Plains CP123D	39.1547	-101.51	6.88	5.91	6.395	USA	2.09	Equidae	Equinae	Astrohippus	ansae
Southern Great Plains SP1D	35.9933	-100.588	6.88	5.91	6.395	USA	2.39	Equidae	Equinae	Astrohippus	ansae
Central Great Plains CP123D	39.1547	-101.51	6.88	5.91	6.395	USA	2.09	Equidae	Equinae	Neohipparion	eurystyle
Central Great Plains CP123D	39.1547	-101.51	6.88	5.91	6.395	USA	2.09	Equidae	Equinae	Dinohippus	interpolatus
Southern Great Plains SP4A	34.9625	-101.192	6.88	5.91	6.395	USA	2.29	Equidae	Equinae	Cormohipparion	ingenuum
Southern Great Plains SP4A	34.9625	-101.192	6.88	5.91	6.395	USA	2.29	Equidae	Equinae	Astrohippus	ansae
Southern Great Plains SP1D	35.9933	-100.588	6.88	5.91	6.395	USA	2.39	Equidae	Equinae	Cormohipparion	ingenuum
Southern Great Plains SP4A	34.9625	-101.192	6.88	5.91	6.395	USA	2.29	Equidae	Equinae	Dinohippus	interpolatus
Southern Great Plains SP1D	35.9933	-100.588	6.88	5.91	6.395	USA	2.39	Equidae	Equinae	Neohipparion	eurystyle
Southern Great Plains SP1D	35.9933	-100.588	6.88	5.91	6.395	USA	2.39	Equidae	Equinae	Dinohippus	interpolatus
Southern Great Plains SP1D	35.9933	-100.588	6.88	5.91	6.395	USA	2.39	Equidae	Equinae	Neohipparion	gidleyi
Southern Great Plains SP1D	35.9933	-100.588	6.88	5.91	6.395	USA	2.39	Equidae	Equinae	Neohipparion	leptode
Pacific Northwest PN14	45.5964	-118.785	6.88	5.91	6.395	USA	2	Equidae	Equinae	Pliohippus	indet.
Southern Great Basin SB57	28.63	-106.08	6.88	5.91	6.395	Mexico	2.5	Equidae	Equinae	Nannippus	aztecus
Northern Great Plains NP5B	54.5	-115	6.88	5.91	6.395	Canada	2.8	Equidae	Equinae	Dinohippus	leidyanus
Pacific Northwest PN14	45.5964	-118.785	6.88	5.91	6.395	USA	2	Equidae	Equinae	Cormohipparion	occidentale
Northern Great Plains NP5B	54.5	-115	6.88	5.91	6.395	Canada	2.8	Equidae	Equinae	Cormohipparion	ingenuum
Northern Great Plains NP5B	54.5	-115	6.88	5.91	6.395	Canada	2.8	Equidae	Equinae	Neohipparion	eurystyle
Central Great Plains CP116E	42.3931	-98.1261	6.88	5.91	6.395	USA	2.23	Equidae	Equinae	Dinohippus	leidyanus
Central Great Plains CP116E	42.3931	-98.1261	6.88	5.91	6.395	USA	2.23	Equidae	Equinae	Cormohipparion	ingenuum
Central Great Plains CP116E	42.3931	-98.1261	6.88	5.91	6.395	USA	2.23	Equidae	Equinae	Pliohippus	nobilis
Central Great Plains CP116E	42.3931	-98.1261	6.88	5.91	6.395	USA	2.23	Equidae	Equinae	Neohipparion	leptode
Pacific Northwest PN15	44.9308	-123.029	6.88	5.91	6.395	USA	2.5	Equidae	Equinae	Dinohippus	spectans
California CC36	37.8597	-122.146	6.88	5.91	6.395	USA	2.6	Equidae	Equinae	Dinohippus	spectans
Southern Great Basin SB56II	20.4783	-98.8636	6.88	5.91	6.395	Mexico	3	Equidae	Equinae	Neohipparion	eurystyle
Southern Great Basin SB56II	20.4783	-98.8636	6.88	5.91	6.395	Mexico	3	Equidae	Equinae	Dinohippus	mexicanus
Southern Great Plains SP4A	34.9625	-101.192	6.88	5.91	6.395	USA	2.29	Equidae	Equinae	Neohipparion	eurystyle
Central Great Plains CP115D	40.8099	-96.6753	6.88	5.91	6.395	USA	2.27	Equidae	Equinae	Neohipparion	eurystyle
Central Great Plains CP115D	40.8099	-96.6753	6.88	5.91	6.395	USA	2.27	Equidae	Equinae	Dinohippus	leidyanus
Lantian-jiulaopo-s3	34.1	109.3	6.733	6.436	6.5845	China	1.83	Equidae	Hipparionini	indet.	indet.
Lantian-jiulaopo-s3	34.1	109.3	6.733	6.436	6.5845	China	1.83	Equidae	Equinae	Hipparion	plocodus
Lantian-42	34.1792	109.255	6.733	6.5845	6.65875	China	1.75	Equidae	Equinae	Hipparion	sp.
Lantian-42	34.1792	109.255	6.733	6.5845	6.65875	China	1.75	Equidae	Equinae	Hipparion	hippidiodus
Pao-Te-Lok.108	39.0022	111.166	6.5845	6.436	6.51025	China	1.88	Equidae	Equinae	Hipparion	forstenae
Upper Nawata (Lothagam)	2.9	36.05	6.54	5.3	5.92	Kenya	1.85	Equidae		Eurygnathohippus	feibeli
Upper Nawata (Lothagam)	2.9	36.05	6.54	5.3	5.92	Kenya	1.85	Equidae		Eurygnathohippus	turkanense
Librilla	37.888	-1.35329	6.252	6.033	6.1425	Spain	2.2	Equidae	Equinae	Hipparion	gromovae
Venta del Moro	39.4	-0.4	6.252	6.179	6.2155	Spain	1.6	Equidae		Cremohipparion	matthewi
Venta del Moro	39.4	-0.4	6.252	6.179	6.2155	Spain	1.6	Equidae		Hippotherium	primigenium
Lemudong'o	1.3	35.95	6.108	6.04	6.074	Kenya	1.86	Equidae		Eurygnathohippus	feibeli
Jara-Borkana	10.5256	40.2517	6	6	6	Ethiopia	1.86	Equidae		Eurygnathohippus	woldegabrieli
Jara-Borkana	10.5256	40.2517	6	6	6	Ethiopia	1.86	Equidae		Eurygnathohippus	feibeli
Jara-Borkana	10.5256	40.2517	6	6	6	Ethiopia	1.86	Equidae	Hipparionini	indet.	indet.
Manonga 1	-3.9	33.733	5.9627	4.41533	5.18902	Tanzania	2.09	Equidae	Equinae	Hipparion	sitifense
Manonga 1	-3.9	33.733	5.9627	4.41533	5.18902	Tanzania	2.09	Equidae		Eurygnathohippus	turkanense
Southern Great Basin SB57II	20.4783	-98.8636	5.91	2.63	4.27	Mexico	3	Equidae	Equinae	Dinohippus	mexicanus
Central Great Plains CP127	38.4564	-97.4725	5.91	4.91	5.41	USA	2.83	Equidae	Equinae	Dinohippus	interpolatus
Central Great Plains CP127	38.4564	-97.4725	5.91	4.91	5.41	USA	2.83	Equidae	Equinae	Astrohippus	indet.
California CC25B	37.6003	-120.579	5.91	4.91	5.41	USA	2.73	Equidae	Equinae	Neohipparion	leptode
Central Great Plains CP127	38.4564	-97.4725	5.91	4.91	5.41	USA	2.83	Equidae	Equinae	Neohipparion	eurystyle
California CC25B	37.6003	-120.579	5.91	4.91	5.41	USA	2.73	Equidae	Equinae	Hipparion	forcei
California CC25B	37.6003	-120.579	5.91	4.91	5.41	USA	2.73	Equidae	Equinae	Dinohippus	interpolatus
Southern Great Basin SB59	21.0167	-100.783	5.91	4.91	5.41	Mexico	3	Equidae	Equinae	Dinohippus	indet.
California CC25B	37.6003	-120.579	5.91	4.91	5.41	USA	2.73	Equidae	Equinae	Nannippus	indet.
Gulf Coast GC6D	27.9578	-97.7786	5.91	4.91	5.41	USA	2.88	Equidae	Equinae	Pseudohipparion	simpsoni
Gulf Coast GC6D	27.9578	-97.7786	5.91	4.91	5.41	USA	2.88	Equidae	Equinae	Neohipparion	eurystyle
Gulf Coast GC6D	27.9578	-97.7786	5.91	4.91	5.41	USA	2.88	Equidae	Equinae	Astrohippus	stockii
Gulf Coast GC13B	28.1822	-81.8242	5.91	4.91	5.41	USA	2.07	Equidae	Equinae	Astrohippus	stockii
Gulf Coast GC6D	27.9578	-97.7786	5.91	4.91	5.41	USA	2.88	Equidae	Equinae	Nannippus	aztecus
Gulf Coast GC6D	27.9578	-97.7786	5.91	4.91	5.41	USA	2.88	Equidae	Equinae	Calippus	indet.
Central Great Plains CP127	38.4564	-97.4725	5.91	4.91	5.41	USA	2.83	Equidae	Equinae	Pseudohipparion	simpsoni
Gulf Coast GC6D	27.9578	-97.7786	5.91	4.91	5.41	USA	2.88	Equidae	Equinae	Nannippus	lenticularis
Southern Great Plains SP1E	35.4823	-97.5352	5.91	4.91	5.41	USA	3	Equidae	Equinae	Neohipparion	eurystyle
Southern Great Plains SP1E	35.4823	-97.5352	5.91	4.91	5.41	USA	3	Equidae	Equinae	Astrohippus	stockii
Southern Great Basin SB60	28.5	-108.25	5.91	4.91	5.41	Mexico	2.6	Equidae	Equinae	Dinohippus	mexicanus
Southern Great Basin SB60	28.5	-108.25	5.91	4.91	5.41	Mexico	2.6	Equidae	Equinae	Astrohippus	stockii
Southern Great Basin SB60	28.5	-108.25	5.91	4.91	5.41	Mexico	2.6	Equidae	Equinae	Neohipparion	eurystyle
Southern Great Basin SB60	28.5	-108.25	5.91	4.91	5.41	Mexico	2.6	Equidae	Equinae	Nannippus	aztecus
Gulf Coast GC6D	27.9578	-97.7786	5.91	4.91	5.41	USA	2.88	Equidae	Equinae	Nannippus	morgani
Southern Great Basin SB58B	21.0833	-100.683	5.91	4.91	5.41	Mexico	1.75	Equidae	Equinae	Astrohippus	stockii
Gulf Coast GC13B	28.1822	-81.8242	5.91	4.91	5.41	USA	2.07	Equidae	Equinae	Neohipparion	eurystyle
Gulf Coast GC13B	28.1822	-81.8242	5.91	4.91	5.41	USA	2.07	Equidae	Equinae	Nannippus	aztecus
Gulf Coast GC13B	28.1822	-81.8242	5.91	4.91	5.41	USA	2.07	Equidae	Equinae	Cormohipparion	emsliei
Gulf Coast GC13B	28.1822	-81.8242	5.91	4.91	5.41	USA	2.07	Equidae	Equinae	Calippus	hondurensis
Gulf Coast GC13B	28.1822	-81.8242	5.91	4.91	5.41	USA	2.07	Equidae	Equinae	Hipparion	tehonense
Gulf Coast GC13B	28.1822	-81.8242	5.91	4.91	5.41	USA	2.07	Equidae	Equinae	Dinohippus	mexicanus
Gulf Coast GC29	30.4581	-91.1402	5.91	4.91	5.41	USA	3	Equidae	Equinae	Nannippus	aztecus
Gulf Coast GC29	30.4581	-91.1402	5.91	4.91	5.41	USA	3	Equidae	Equinae	Cormohipparion	emsliei
California CC40	33.8911	-117.047	5.91	4.91	5.41	USA	2.2	Equidae	Equinae	Dinohippus	edensis
California CC37	38.01	-122.301	5.91	4.91	5.41	USA	2.67	Equidae	Equinae	Pliohippus	coalingensis
Northern Great Basin NB10	35.0878	-118.234	5.91	4.91	5.41	USA	2	Equidae	Equinae	Dinohippus	edensis
California CC40	33.8911	-117.047	5.91	4.91	5.41	USA	2.2	Equidae	Equinae	Dinohippus	leidyanus
East Coast Marine EM8B	35.8189	-78.6447	5.91	4.91	5.41	USA	2	Equidae	Equinae	Pseudohipparion	simpsoni
Southern Great Basin SB34III	35.5	-106.417	5.91	4.91	5.41	USA	3	Equidae	Equinae	Equus	indet.
Southern Great Basin SB9	34.6136	-113.536	5.91	4.91	5.41	USA	2.43	Equidae	Equinae	Onohippidium	galushai
Gulf Coast GC31	33.755	-84.39	5.91	4.91	5.41	USA	3	Equidae	Equinae	Nannippus	aztecus
Southern Great Plains SP4B	34.9528	-101.495	5.91	4.91	5.41	USA	2.25	Equidae	Equinae	Dinohippus	mexicanus
Southern Great Plains SP4B	34.9528	-101.495	5.91	4.91	5.41	USA	2.25	Equidae	Equinae	Cormohipparion	ingenuum
Central Great Plains CP116F	42.8158	-97.7253	5.91	4.91	5.41	USA	2.07	Equidae	Equinae	Dinohippus	indet.
Central Great Plains CP116F	42.8158	-97.7253	5.91	4.91	5.41	USA	2.07	Equidae	Equinae	Cormohipparion	ingenuum
Northern Great Basin NB10	35.0878	-118.234	5.91	4.91	5.41	USA	2	Equidae	Equinae	Dinohippus	leidyanus
Central Great Plains CP116F	42.8158	-97.7253	5.91	4.91	5.41	USA	2.07	Equidae	Equinae	Neohipparion	eurystyle
California CC37	38.01	-122.301	5.91	4.91	5.41	USA	2.67	Equidae	Equinae	Neohipparion	eurystyle
California CC37	38.01	-122.301	5.91	4.91	5.41	USA	2.67	Equidae	Equinae	Dinohippus	indet.
Northern Great Basin NB35IIIA	39.1608	-119.754	5.91	4.91	5.41	USA	2.25	Equidae	Equinae	Dinohippus	indet.
Southern Great Basin SB59	21.0167	-100.783	5.91	4.91	5.41	Mexico	3	Equidae	Equinae	Nannippus	indet.
Southern Great Basin SB58IIB	20.5667	-103.676	5.91	4.91	5.41	Mexico	2.43	Equidae	Equinae	Dinohippus	mexicanus
Southern Great Basin SB58IIB	20.5667	-103.676	5.91	4.91	5.41	Mexico	2.43	Equidae	Equinae	Neohipparion	eurystyle
Southern Great Plains SP4B	34.9528	-101.495	5.91	4.91	5.41	USA	2.25	Equidae	Equinae	Nannippus	aztecus
Southern Great Plains SP4B	34.9528	-101.495	5.91	4.91	5.41	USA	2.25	Equidae	Equinae	Pseudohipparion	simpsoni
Southern Great Plains SP4B	34.9528	-101.495	5.91	4.91	5.41	USA	2.25	Equidae	Equinae	Neohipparion	eurystyle
Southern Great Basin SB34IIA	35.6672	-105.964	5.91	4.91	5.41	USA	3	Equidae	Equinae	Dinohippus	mexicanus
Southern Great Basin SB34IIA	35.6672	-105.964	5.91	4.91	5.41	USA	3	Equidae	Equinae	Astrohippus	stockii
Pao-Te-Lok.30	38.9854	111.176	5.767	5.501	5.634	China	2.13	Equidae	Equinae	Cremohipparion	forstenae
Pao-Te-Lok.30	38.9854	111.176	5.767	5.501	5.634	China	2.13	Equidae	Equinae	Shanxihippus	dermatorhinum
Asa Koma	10.3035	40.2331	5.7	5.7	5.7	Ethiopia	1.56	Equidae		Eurygnathohippus	woldegabrieli
Alayla	10.2717	40.2731	5.7	5.7	5.7	Ethiopia	1.57	Equidae		Eurygnathohippus	feibeli
Asa Koma	10.3035	40.2331	5.7	5.7	5.7	Ethiopia	1.56	Equidae		Eurygnathohippus	feibeli
Adu Dora	10.3625	40.2278	5.7	5.7	5.7	Ethiopia	2.17	Equidae		Eurygnathohippus	feibeli
Digiba Dora	10.3889	40.2366	5.7	5.7	5.7	Ethiopia	1.44	Equidae		Eurygnathohippus	feibeli
Bikir Mali Koma	10.3153	40.2707	5.7	5.7	5.7	Ethiopia	1.5	Equidae		Eurygnathohippus	feibeli
Saitune Dora	10.2676	40.3085	5.6	5.54	5.57	Ethiopia	1.18	Equidae		Eurygnathohippus	feibeli
Khirgis-Nur II-upper	49.2	93.4	5.4	4.6	5	Mongolia	2.36	Equidae	Hipparionini	Sivalhippus	theobaldi
Khirgis-Nur II-upper	49.2	93.4	5.4	4.6	5	Mongolia	2.36	Equidae	Equinae	Plesiohipparion	houfenense
Khirgis-Nur II-upper	49.2	93.4	5.4	4.6	5	Mongolia	2.36	Equidae	Equinae	Cremohipparion	elegans
Khirgis-Nur II-upper	49.2	93.4	5.4	4.6	5	Mongolia	2.36	Equidae	Hipparionini	Sivalhippus	theobaldi
Khirgis-Nur II-upper	49.2	93.4	5.4	4.6	5	Mongolia	2.36	Equidae	Equinae	Hipparion	hippidiodus
Sterkfontein 4	-26.0833	27.7667	5.333	0.0117	2.67235	South Africa	2.21	Equidae	Equinae	Equus	burchellii
Chemeron	0.65502	35.8524	5.333	1.8	3.5665	Kenya	2	Equidae	Equinae	Hipparion	sitifense
Chemeron	0.65502	35.8524	5.333	1.8	3.5665	Kenya	2	Equidae	Equinae	Hipparion	ethiopicum
Chemeron	0.65502	35.8524	5.333	1.8	3.5665	Kenya	2	Equidae		Hippotherium	primigenium
Bala Deino	0.335	34.485	5.333	2.58	3.9565	Kenya	2	Equidae	Equinae	Hipparion	albertense
Kanam West	0.334	34.484	5.333	2.58	3.9565	Kenya	2.21	Equidae	Equinae	Hipparion	albertense
Kanam HC 845	0.337	34.487	5.333	2.58	3.9565	Kenya	3	Equidae	Equinae	Hipparion	albertense
Kanam East Hot Springs	0.336	34.486	5.333	2.58	3.9565	Kenya	2.33	Equidae	Equinae	Hipparion	albertense
Makapansgat 3	-24.1581	29.1667	5.333	2.58	3.9565	South Africa	2.1	Equidae		Eurygnathohippus	libycus
Shikhov	40	49	5.333	2.58	3.9565	Azerbaijan	3	Equidae	Equinae	Hipparion	apcheronicum
Dzhenama	49.2	83.6	5.333	2.58	3.9565	Kazakhstan	1.4	Equidae	Hipparionini	Hipparion	indet.
Gidzhalsaj	41.15	70	5.333	2.58	3.9565	Uzbekistan	2.25	Equidae	Hipparionini	Hipparion	indet.
Stavropol-Kavkazskij	45	42.1	5.333	2.58	3.9565	Russia	1.7	Equidae	Hipparionini	Hipparion	indet.
Kubi Algi	3.00278	36	5.333	2.58	3.9565	Kenya	2	Equidae		Eurygnathohippus	hasumense
Nogaret	43.7893	3.20964	5.333	2.58	3.9565	France	1.8	Equidae	Equinae	Equus	stenonis
Hondeklip Bay	-30.317	17.283	5.333	2.58	3.9565	South Africa	2.25	Equidae	Equinae	Hipparion	sitifense
Beregovaya	50.5333	106.9	5.333	2.58	3.9565	Russia	2.5	Equidae	Equinae	Baryhipparion	tchicoicum
Tankhizdarja	39	67.45	5.333	3.49767	4.41533	Uzbekistan	2.67	Equidae	Equinae	Hipparion	parvum
Galili 3	10	40	5.333	3.6	4.4665	Ethiopia	2	Equidae		Eurygnathohippus	woldegabrieli
Galili 2	10	40	5.333	3.6	4.4665	Ethiopia	1.89	Equidae		Eurygnathohippus	woldegabrieli
Manonga 2	-4.033	33.767	5.333	3.6	4.4665	Tanzania	2.14	Equidae		Eurygnathohippus	woldegabrieli
Koobi Fora (Moiti)	3.002	36.002	5.333	3.6	4.4665	Kenya	2.4	Equidae		Eurygnathohippus	woldegabrieli
Albertine 2	1.833	30.833	5.333	3.6	4.4665	Uganda	2	Equidae	Equinae	Hipparion	sitifense
Albertine 2	1.833	30.833	5.333	3.6	4.4665	Uganda	2	Equidae		Eurygnathohippus	turkanense
Galili 4	10	40	5.333	3.6	4.4665	Ethiopia	1.96	Equidae		Eurygnathohippus	woldegabrieli
Galili 1	10	40	5.333	3.6	4.4665	Ethiopia	1.57	Equidae		Eurygnathohippus	woldegabrieli
Beredi (South 3)	-3.886	33.85	5.333	3.6	4.4665	Tanzania	2	Equidae		Eurygnathohippus	hasumense
Manonga 3	-3.867	33.7	5.333	3.6	4.4665	Tanzania	2.46	Equidae		Eurygnathohippus	hasumense
Albertine 8	1	30.467	5.333	3.6	4.4665	Uganda	2	Equidae	Equinae	Hipparion	indet.
Zhaotong	27.3383	103.718	5.333	3.9565	4.64475	China	2	Equidae	Equinae	Equus	indet.
Zhaotong	27.3383	103.718	5.333	3.9565	4.64475	China	2	Equidae	Equinae	Equus	yunnanensis
Saketi_lower	32	77.2833	5.333	3.9565	4.64475	India	1.56	Equidae	Equinae	Hipparion	indet.
Alabuga	41.5	76.2	5.333	4.41533	4.87417	Kyrgyzstan	2.6	Equidae	Hipparionini	Hipparion	indet.
Tulchin	48.5	29	5.333	4.41533	4.87417	Ukraine	1.5	Equidae	Hipparionini	Hipparion	indet.
Timkovo	47.9	29.4	5.333	4.41533	4.87417	Ukraine	1.4	Equidae	Hipparionini	Hipparion	indet.
Zhuravlevka	48.6	28.6	5.333	4.41533	4.87417	Ukraine	2	Equidae	Hipparionini	Hipparion	indet.
Yushe-YS156	37	112.9	5.3	2.6	3.95	China	3	Equidae	Equinae	Hipparion	indet.
Mianxian-yangjiawan	33.1667	106.7	5.3	2.6	3.95	China	1.5	Equidae	Equinae	Hipparion	indet.
Linxia_Duikang	35.4278	103.547	5.3	2.6	3.95	China	2.14	Equidae	Equinae	Proboscidipparion	pater
Linxia_Duikang	35.4278	103.547	5.3	2.6	3.95	China	2.14	Equidae	Equinae	Hipparion	hippidiodus
Linxia_Duikang	35.4278	103.547	5.3	2.6	3.95	China	2.14	Equidae	Equinae	Sivalhippus	platyodus
Kos	36.893	27.289	5.3	2.725	4.0125	Greece	2.2	Equidae	Equinae	Equus	stenonis
Kos	36.893	27.289	5.3	2.725	4.0125	Greece	2.2	Equidae	Equinae	Equus	ferus
Kos	36.893	27.289	5.3	2.725	4.0125	Greece	2.2	Equidae	Hipparionini	Hipparion	indet.
Linxia_Yinchuan	35.6786	103.071	5.3	3.4	4.35	China	2	Equidae	Equinae	Cremohipparion	licenti
Lingtai-xiaoshigou-3	35.0667	107.725	5.3	3.4	4.35	China	2	Equidae	Equinae	Plesiohipparion	houfenense
Lingtai-xiaoshigou-3	35.0667	107.725	5.3	3.4	4.35	China	2	Equidae	Equinae	Proboscidipparion	pater
Sinap 59	40.55	32.6	5.3	3.55	4.425	Turkey	3	Equidae	Hipparionini	indet.	indet.
Dinar Akcak?y	38.128	30.256	5.3	3.55	4.425	Turkey	2.17	Equidae	Equinae	Hipparion	indet.
Yushe-Gaozhuang	37	113	5.3	3.55	4.425	China	2	Equidae		Proboscidipparion	pater
Yushe-Gaozhuang	37	113	5.3	3.55	4.425	China	2	Equidae	Equinae	Plesiohipparion	houfenense
Gaozhuang	37.2867	113.119	5.3	3.55	4.425	China	2	Equidae	Equinae	Plesiohipparion	houfenense
Gaozhuang	37.2867	113.119	5.3	3.55	4.425	China	2	Equidae		Proboscidipparion	pater
Apak (Lothagam)	2.9	36.05	5.3	4.2	4.75	Kenya	2.03	Equidae		Eurygnathohippus	indet.
Apak (Lothagam)	2.9	36.05	5.3	4.2	4.75	Kenya	2.03	Equidae		Eurygnathohippus	indet.
Olkhon (Sarayskaya: hor. 5)	53.1	107.2	5.3	4.425	4.8625	Russia	2	Equidae	Hipparionini	indet.	indet.
G?d?ll?	47.6	19.367	5.3	5	5.15	Hungary	1.5	Equidae	Equinae	Proboscidipparion	crassum
Orrios	40.35	-1	5.3	5	5.15	Spain	2	Equidae	Hipparionini	Cremohipparion	fissurae
Guanghe-shilidun-LX200014	35.5	103.5	5.3	5	5.15	China	1.67	Equidae	Equinae	Hipparion	indet.
Bozarmut	37.316	28.192	5.3	5	5.15	Turkey	3	Equidae	Equinae	Hipparion	indet.
Montpellier	43.6	3.89	5.3	5	5.15	France	1.46	Equidae	Hipparionini	Proboscidipparion	crassum
Saint Laurent des Arbres	43.933	4.8	5.3	5	5.15	France	1.67	Equidae	Hipparionini	Proboscidipparion	crassum
Alcoy-Mina	38.702	-0.477198	5.3	5	5.15	Spain	2	Equidae	Equinae	Proboscidipparion	crassum
Montpellier	43.6	3.89	5.3	5	5.15	France	1.46	Equidae	Equinae	Proboscidipparion	crassum
Peralejos E	40.4833	-1.0333	5.3	5	5.15	Spain	1.67	Equidae		indet.	indet.
Kossom Bougoudi	16.333	18.667	5.3	5	5.15	Chad	2.08	Equidae	Equinae	Hipparion	sp.
Villalba Alta Rio 1	40.55	-0.9	5.3	5	5.15	Spain	3	Equidae		Cremohipparion	fissurae
Kessani 1:2	41	25	5.3	5	5.15	Greece	1.67	Equidae	Equinae	Hipparion	indet.
Kossom Bougoudi	16.333	18.667	5.3	5	5.15	Chad	2.08	Equidae	Equinae	Hipparion	sp.
Orrios 1	40.35	-1	5.3	5	5.15	Spain	2	Equidae	Equinae	Cremohipparion	fissurae
Alcoy	38.6	-0.5	5.3	5	5.15	Spain	2.13	Equidae	Equinae	Proboscidipparion	crassum
Alcoy	38.6	-0.5	5.3	5	5.15	Spain	2.13	Equidae	Equinae	Hipparion	gromovae
Kosyakino	43.903	46.68	5.3	5	5.15	Russia	1.63	Equidae	Equinae	Cremohipparion	mediterraneum
Khadazur	31.4731	49.6258	5.3	5	5.15	Iran	3	Equidae	Equinae	Cremohipparion	mediterraneum
Kolle	16.333	19	5.3	5	5.15	Chad	2.07	Equidae		Sivalhippus	turkanense
La Gloria 4	40.3833	-1.0667	5.3	5	5.15	Spain	2.14	Equidae	Equinae	Cremohipparion	elegans
Kardia	39.333	21.75	5.3	5	5.15	Greece	3	Equidae	Equinae	Proboscidipparion	crassum
Dorkovo	42.05	24.1222	5.3	5	5.15	Bulgaria	1.29	Equidae	Equinae	Proboscidipparion	crassum
La Gloria 4	40.3833	-1.0667	5.3	5	5.15	Spain	2.14	Equidae	Equinae	Cremohipparion	fissurae
Guide-heerjia	36	101.5	5.235	4.3965	4.81575	China	2	Equidae	Equinae	Hipparion	indet.
Agera Gawtu	10.423	40.234	5.2	4.9	5.05	Ethiopia	1.44	Equidae		Eurygnathohippus	feibeli
Amba West	10.4134	40.4478	5.2	5.2	5.2	Ethiopia	2	Equidae		Eurygnathohippus	feibeli
Amba East	10.4059	40.4539	5.2	5.2	5.2	Ethiopia	2	Equidae		Eurygnathohippus	feibeli
Kuseralee	10.303	40.253	5.2	5.2	5.2	Ethiopia	1.81	Equidae		Eurygnathohippus	feibeli
Amba East	10.4059	40.4539	5.2	5.2	5.2	Ethiopia	2	Equidae		Eurygnathohippus	woldegabrieli
Langebaanweg (LQSM + MPPM)	-32.9667	18.15	5.15567	5.07633	5.116	South Africa	2.1	Equidae	\N	Eurygnathohippus	hooijeri
Sinap 85	40.56	32.71	5	2.5	3.75	Turkey	3	Equidae	Equinae	Equus	indet.
Makapansgat	-24.15	29.1667	5	2.5	3.75	South Africa	2	Equidae	Equinae	Equus	capensis
W?lfersheim	50.4083	8.85694	5	3.55	4.275	Germany	1.25	Equidae	Hipparionini	indet.	indet.
Apolakkia	36.067	27.8	5	3.55	4.275	Greece	2.33	Equidae	Equinae	Proboscidipparion	crassum
La Calera	40.2653	-1.05278	5	3.55	4.275	Spain	1.75	Equidae	Equinae	Hipparion	indet.
Gaotege	43.4986	115.444	5	3.55	4.275	China	3	Equidae	Equinae	Baryhipparion	insperatum
Gaotege	43.4986	115.444	5	3.55	4.275	China	3	Equidae	Equinae	Plesiohipparion	huangheense
Villalba Alta 1	40.55	-0.9	5	3.55	4.275	Spain	2	Equidae	Equinae	Hipparion	indet.
Megalo Emvolon (MEV)	40.3	22.45	5	3.55	4.275	Greece	2	Equidae	Equinae	Plesiohipparion	longipes
Capeni	46.0167	25.55	5	3.55	4.275	Romania	1.5	Equidae	Equinae	Hipparion	indet.
Ptolemais lignite mines -MN 15	40.4829	21.7659	5	3.55	4.275	Greece	2	Equidae	Equinae	Proboscidipparion	crassum
Perpignan	42.683	2.883	5	3.55	4.275	France	1.5	Equidae	Equinae	Proboscidipparion	crassum
Ekora	2.5	36.417	5	3.55	4.275	Kenya	2.29	Equidae		Sivalhippus	turkanense
Ekora	2.5	36.417	5	3.55	4.275	Kenya	2.29	Equidae		Hippotherium	primigenium
Layna	41.05	-2.19	5	3.55	4.275	Spain	2.17	Equidae	Equinae	Cremohipparion	fissurae
Yuxian_Huabaogou_II	40.1	114.703	5	3.55	4.275	China	2	Equidae	Equinae	Hipparion	hippidiodus
?alta 2	40.239	32.544	5	3.55	4.275	Turkey	2	Equidae	Equinae	Plesiohipparion	sp.
?alta 2	40.239	32.544	5	3.55	4.275	Turkey	2	Equidae	Equinae	Proboscidipparion	heintzi
Villalba-Alta	40.617	-0.967	5	3.55	4.275	Spain	3	Equidae		Cremohipparion	fissurae
Orrios 7	40.35	-1	5	3.55	4.275	Spain	2.33	Equidae		Cremohipparion	fissurae
Garaet Ichkeul	37.15	9.667	5	3.55	4.275	Tunisia	2.3	Equidae	Equinae	Equus	numidicus
Malushteni	46.13	28.08	5	3.55	4.275	Romania	1.8	Equidae	Equinae	Equus	major
Garaet Ichkeul	37.15	9.667	5	3.55	4.275	Tunisia	2.3	Equidae		Eurygnathohippus	libycus
Ekora	2.5	36.417	5	3.55	4.275	Kenya	2.29	Equidae	Equinae	Hipparion	sitifense
Malushteni	46.13	28.08	5	3.55	4.275	Romania	1.8	Equidae	Equinae	Proboscidipparion	crassum
Southern Great Basin SB65	21.0167	-100.783	4.91	1.8	3.355	Mexico	2.38	Equidae	Equinae	Equus	simplicidens
Southern Great Basin SB65	21.0167	-100.783	4.91	1.8	3.355	Mexico	2.38	Equidae	Equinae	Equus	idahoensis
Southern Great Basin SB65	21.0167	-100.783	4.91	1.8	3.355	Mexico	2.38	Equidae	Equinae	Nannippus	peninsulatus
Southern Great Basin SB63II	20.5667	-103.676	4.91	1.8	3.355	Mexico	3	Equidae	Equinae	Nannippus	indet.
Southern Great Basin SB60IIIB	20.5667	-103.676	4.91	1.8	3.355	Mexico	2	Equidae	Equinae	Nannippus	indet.
Southern Great Basin SB64II	20.4783	-98.8636	4.91	1.8	3.355	Mexico	3	Equidae	Equinae	Nannippus	indet.
Southern Great Basin SB64II	20.4783	-98.8636	4.91	1.8	3.355	Mexico	3	Equidae	Equinae	Equus	simplicidens
California CC52III	30.55	-115.167	4.91	1.8	3.355	Mexico	3	Equidae	Equinae	Equus	simplicidens
Northern Great Basin NB36	38.6667	-118.917	4.91	1.8	3.355	United States of America	2	Equidae	Equinae	Equus	indet.
Southern Great Basin SB55IIB	20.4783	-98.8636	4.91	1.8	3.355	Mexico	3	Equidae	Equinae	Nannippus	peninsulatus
Southern Great Basin SB55IIB	20.4783	-98.8636	4.91	1.8	3.355	Mexico	3	Equidae	Equinae	Equus	indet.
Pacific Northwest PN3C	47.0425	-122.893	4.91	2.63	3.77	USA	1.67	Equidae	Equinae	Equus	simplicidens
Northern Great Basin NB35IIIB	38.9767	-119.54	4.91	2.63	3.77	USA	1.75	Equidae	Equinae	Equus	simplicidens
Southern Great Basin SB14A	32.1136	-109.921	4.91	2.63	3.77	USA	2.13	Equidae	Equinae	Equus	simplicidens
Pacific Northwest PN4	47.0425	-122.893	4.91	2.63	3.77	USA	2.17	Equidae	Equinae	Equus	simplicidens
Northern Great Basin NB12B	35.9817	-117.664	4.91	2.63	3.77	USA	1.75	Equidae	Equinae	Equus	simplicidens
Central Great Plains CP130	39.0558	-95.6894	4.91	2.63	3.77	USA	2.5	Equidae	Equinae	Nannippus	peninsulatus
Central Great Plains CP117B	40.8099	-96.6753	4.91	2.63	3.77	USA	2.67	Equidae	Equinae	Nannippus	indet.
Central Great Plains CP117B	40.8099	-96.6753	4.91	2.63	3.77	USA	2.67	Equidae	Equinae	Equus	simplicidens
Central Great Plains CP118	40.8099	-96.6753	4.91	2.63	3.77	USA	2.67	Equidae	Equinae	Equus	simplicidens
Southern Great Basin SB38IIB	35.6672	-105.964	4.91	2.63	3.77	USA	3	Equidae	Equinae	Equus	simplicidens
Central Great Plains CP80	37	-103.633	4.91	2.63	3.77	USA	2	Equidae	Equinae	Equus	calobatus
Central Great Plains CP118	40.8099	-96.6753	4.91	2.63	3.77	USA	2.67	Equidae	Equinae	Nannippus	peninsulatus
Central Great Plains CP118	40.8099	-96.6753	4.91	2.63	3.77	USA	2.67	Equidae	Equinae	Equus	calobatus
Central Great Plains CP80	37	-103.633	4.91	2.63	3.77	USA	2	Equidae	Equinae	Equus	simplicidens
Southern Great Basin SB38IIC	35.6672	-105.964	4.91	2.63	3.77	USA	2.57	Equidae	Equinae	Equus	calobatus
Southern Great Basin SB38IIC	35.6672	-105.964	4.91	2.63	3.77	USA	2.57	Equidae	Equinae	Equus	scotti
Central Great Plains CP128C	39.0558	-95.6894	4.91	2.63	3.77	USA	2.42	Equidae	Equinae	Equus	cumminsi
Central Great Plains CP128C	39.0558	-95.6894	4.91	2.63	3.77	USA	2.42	Equidae	Equinae	Nannippus	peninsulatus
Southern Great Plains SP1F	32.5186	-96.3808	4.91	2.63	3.77	USA	2.29	Equidae	Equinae	Equus	cumminsi
Central Great Plains CP128C	39.0558	-95.6894	4.91	2.63	3.77	USA	2.42	Equidae	Equinae	Equus	simplicidens
Southern Great Plains SP1F	32.5186	-96.3808	4.91	2.63	3.77	USA	2.29	Equidae	Equinae	Nannippus	beckensis
Southern Great Plains SP1F	32.5186	-96.3808	4.91	2.63	3.77	USA	2.29	Equidae	Equinae	Equus	simplicidens
Southern Great Basin SB38IIB	35.6672	-105.964	4.91	2.63	3.77	USA	3	Equidae	Equinae	Equus	cumminsi
Southern Great Basin SB35D	35.6672	-105.964	4.91	2.63	3.77	USA	2.43	Equidae	Equinae	Nannippus	peninsulatus
California CC47D	38.5556	-121.469	4.91	2.63	3.77	USA	3	Equidae	Equinae	Equus	indet.
Southern Great Basin SB35C	35.6672	-105.964	4.91	2.63	3.77	USA	2.75	Equidae	Equinae	Equus	scotti
Southern Great Basin SB35C	35.6672	-105.964	4.91	2.63	3.77	USA	2.75	Equidae	Equinae	Equus	cumminsi
Southern Great Basin SB35D	35.6672	-105.964	4.91	2.63	3.77	USA	2.43	Equidae	Equinae	Equus	simplicidens
Southern Great Basin SB35D	35.6672	-105.964	4.91	2.63	3.77	USA	2.43	Equidae	Equinae	Equus	cumminsi
Southern Great Basin SB62	28.75	-108.25	4.91	2.63	3.77	Mexico	2.33	Equidae	Equinae	Equus	simplicidens
West Coast Marine WM26	32.715	-117.162	4.91	2.63	3.77	USA	2.2	Equidae	Equinae	Equus	simplicidens
Southern Great Basin SB63	28	-107.25	4.91	2.63	3.77	Mexico	2.33	Equidae	Equinae	Nannippus	peninsulatus
Southern Great Basin SB63	28	-107.25	4.91	2.63	3.77	Mexico	2.33	Equidae	Equinae	Equus	simplicidens
Central Great Plains CP128AA	39.0558	-95.6894	4.91	2.63	3.77	USA	2.5	Equidae	Equinae	Pseudohipparion	indet.
Northern Great Basin NB33A	37.64	-114.88	4.91	2.63	3.77	USA	3	Equidae	Equinae	Pliohippus	indet.
Southern Great Basin SB37A	35.6672	-105.964	4.91	2.63	3.77	USA	2.17	Equidae	Equinae	Equus	simplicidens
California CC53	23	-112	4.91	2.63	3.77	Mexico	2.4	Equidae	Equinae	Equus	simplicidens
California CC44	38.2972	-122.284	4.91	2.63	3.77	USA	3	Equidae	Equinae	Equus	simplicidens
California CC43A	38.5556	-121.469	4.91	2.63	3.77	USA	2.5	Equidae	Equinae	Equus	simplicidens
Southern Great Basin SB37A	35.6672	-105.964	4.91	2.63	3.77	USA	2.17	Equidae	Equinae	Equus	scotti
California CC45	38.5556	-121.469	4.91	2.63	3.77	USA	3	Equidae	Equinae	Equus	simplicidens
Southern Great Basin SB15A	33.1017	-109.269	4.91	2.63	3.77	USA	2.5	Equidae	Equinae	Equus	simplicidens
Southern Great Basin SB14C	33.4485	-112.074	4.91	2.63	3.77	USA	2.14	Equidae	Equinae	Nannippus	peninsulatus
Southern Great Basin SB14B	32.1136	-109.921	4.91	2.63	3.77	USA	2.17	Equidae	Equinae	Equus	simplicidens
Southern Great Basin SB14A	32.1136	-109.921	4.91	2.63	3.77	USA	2.13	Equidae	Equinae	Nannippus	peninsulatus
Southern Great Basin SB14C	33.4485	-112.074	4.91	2.63	3.77	USA	2.14	Equidae	Equinae	Equus	simplicidens
Southern Great Basin SB14B	32.1136	-109.921	4.91	2.63	3.77	USA	2.17	Equidae	Equinae	Nannippus	peninsulatus
California CC52II	30.55	-115.167	4.91	2.63	3.77	Mexico	2.67	Equidae	Equinae	Equus	simplicidens
Central Great Plains CP130	39.0558	-95.6894	4.91	2.63	3.77	USA	2.5	Equidae	Equinae	Equus	simplicidens
Central Great Plains CP128B	39.0558	-95.6894	4.91	2.63	3.77	USA	2	Equidae	Equinae	Equus	simplicidens
Southern Great Basin SB34IIB	35.6672	-105.964	4.91	2.63	3.77	USA	2.75	Equidae	Equinae	Nannippus	peninsulatus
Central Great Plains CP117A	40.8099	-96.6753	4.91	2.63	3.77	USA	2	Equidae	Equinae	Equus	simplicidens
Southern Great Basin SB15A	33.1017	-109.269	4.91	2.63	3.77	USA	2.5	Equidae	Equinae	Nannippus	peninsulatus
Southern Great Basin SB35B	33.0833	-107.25	4.91	2.63	3.77	USA	2.5	Equidae	Equinae	Equus	simplicidens
Southern Great Basin SB34IIB	35.6672	-105.964	4.91	2.63	3.77	USA	2.75	Equidae	Equinae	Equus	simplicidens
Southern Great Basin SB16	31.5378	-110.826	4.91	2.63	3.77	USA	2.75	Equidae	Equinae	Equus	simplicidens
Southern Great Basin SB37B	35.6672	-105.964	4.91	2.63	3.77	USA	2	Equidae	Equinae	Equus	indet.
Southern Great Basin SB35A	35.6672	-105.964	4.91	2.63	3.77	USA	2	Equidae	Equinae	Equus	indet.
Southern Great Basin SB18A0	33.4485	-112.074	4.91	2.63	3.77	USA	3	Equidae	Equinae	Nannippus	peninsulatus
Southern Great Basin SB18A0	33.4485	-112.074	4.91	2.63	3.77	USA	3	Equidae	Equinae	Equus	indet.
Southern Great Basin SB12	34.5617	-112.383	4.91	2.63	3.77	USA	3	Equidae	Equinae	Nannippus	peninsulatus
Southern Great Basin SB12	34.5617	-112.383	4.91	2.63	3.77	USA	3	Equidae	Equinae	Equus	indet.
California CC48C	38.5556	-121.469	4.91	2.63	3.77	USA	2	Equidae	Equinae	Equus	indet.
Southern Great Basin SB15C	33.4485	-112.074	4.91	2.63	3.77	USA	2.5	Equidae	Equinae	Equus	indet.
Northern Great Basin NB13A	38.5556	-121.469	4.91	2.63	3.77	USA	3	Equidae	Equinae	Dinohippus	indet.
Southern Great Basin SB64	21	-101	4.91	2.63	3.77	Mexico	2.6	Equidae	Equinae	Equus	simplicidens
Northern Great Basin NB13B	38.5556	-121.469	4.91	2.63	3.77	USA	2.67	Equidae	Equinae	Dinohippus	indet.
Southern Great Basin SB58C	21.0833	-100.683	4.91	2.63	3.77	Mexico	2.17	Equidae	Equinae	Nannippus	peninsulatus
Southern Great Basin SB58C	21.0833	-100.683	4.91	2.63	3.77	Mexico	2.17	Equidae	Equinae	Equus	indet.
Southern Great Basin SB66	19.4333	-99.1333	4.91	2.63	3.77	Mexico	2.33	Equidae	Equinae	Equus	idahoensis
Southern Great Basin SB13	33.4485	-112.074	4.91	2.63	3.77	USA	2.18	Equidae	Equinae	Dinohippus	indet.
Northern Great Basin NB13B	38.5556	-121.469	4.91	2.63	3.77	USA	2.67	Equidae	Equinae	Equus	simplicidens
Southern Great Basin SB66	19.4333	-99.1333	4.91	2.63	3.77	Mexico	2.33	Equidae	Equinae	Dinohippus	indet.
Southern Great Basin SB64	21	-101	4.91	2.63	3.77	Mexico	2.6	Equidae	Equinae	Nannippus	peninsulatus
Northern Great Basin NB13B	38.5556	-121.469	4.91	2.63	3.77	USA	2.67	Equidae	Equinae	Hippidion	indet.
Southern Great Basin SB64	21	-101	4.91	2.63	3.77	Mexico	2.6	Equidae	Equinae	Dinohippus	osborni
Southern Great Basin SB61	28.25	-108	4.91	2.63	3.77	Mexico	3	Equidae	Equinae	Dinohippus	mexicanus
Southern Great Basin SB13	33.4485	-112.074	4.91	2.63	3.77	USA	2.18	Equidae	Equinae	Equus	simplicidens
Southern Great Basin SB13	33.4485	-112.074	4.91	2.63	3.77	USA	2.18	Equidae	Equinae	Astrohippus	stockii
Southern Great Basin SB13	33.4485	-112.074	4.91	2.63	3.77	USA	2.18	Equidae	Equinae	Nannippus	peninsulatus
Canadian High Arctic HA3	80.1667	-79.0833	4.91	2.63	3.77	Canada	2	Equidae	Equinae	Plesiohipparion	indet.
Zhabyrtau	43	80.1	4.8625	3.9875	4.425	Kazakhstan	2.4	Equidae	Equinae	Hipparion	hippidiodus
Ajgyrzhal	42.95	80.05	4.8625	3.9875	4.425	Kazakhstan	2.25	Equidae	Equinae	Hipparion	hippidiodus
Zhabyrtau	43	80.1	4.8625	3.9875	4.425	Kazakhstan	2.4	Equidae	Equinae	Plesiohipparion	houfenense
Ajgyrzhal	42.95	80.05	4.8625	3.9875	4.425	Kazakhstan	2.25	Equidae	Equinae	Plesiohipparion	houfenense
Dzagso-Hairhan-4-2	48	94	4.71667	4.13333	4.425	Mongolia	2.67	Equidae	Hipparionini	Hipparion	indet.
Gona Western Margin 3	11.15	40.3167	4.631	4.493	4.562	Ethiopia	1.67	Equidae		Eurygnathohippus	woldegabrieli
Khirgis-Nur II	49.2	93.4	4.6	4.2	4.4	Mongolia	2.5	Equidae	Equinae	Hipparion	parvum
Khirgis-Nur II	49.2	93.4	4.6	4.2	4.4	Mongolia	2.5	Equidae	Equinae	Plesiohipparion	houfenense
Khirgis-Nur II	49.2	93.4	4.6	4.2	4.4	Mongolia	2.5	Equidae	Equinae	Cremohipparion	elegans
Khirgis-Nur II	49.2	93.4	4.6	4.2	4.4	Mongolia	2.5	Equidae	Equinae	Hipparion	sefvei
Chono Hariah 1 lower	48.3	93	4.6	4.2	4.4	Mongolia	2.67	Equidae	Equinae	Hipparion	sefvei
Chono Hariah 1 lower	48.3	93	4.6	4.2	4.4	Mongolia	2.67	Equidae	Equinae	Plesiohipparion	houfenense
Khirgis-Nur II	49.2	93.4	4.6	4.2	4.4	Mongolia	2.5	Equidae	Hipparionini	Sivalhippus	theobaldi
Khirgis-Nur II	49.2	93.4	4.6	4.2	4.4	Mongolia	2.5	Equidae	Equinae	Hipparion	hippidiodus
As Duma	11.15	40.3167	4.51	4.32	4.415	Ethiopia	1.67	Equidae		Eurygnathohippus	indet.
As Duma	11.15	40.3167	4.51	4.32	4.415	Ethiopia	1.67	Equidae		Eurygnathohippus	indet.
Chonbulak	42.3	76	4.41533	2.58	3.49767	Kyrgyzstan	2.67	Equidae	Hipparionini	Hipparion	indet.
Leijiahe_large mammal I	35.0667	107.725	4.41533	3.49767	3.9565	China	3	Equidae	Equinae	Plesiohipparion	houfenense
Leijiahe_large mammal I	35.0667	107.725	4.41533	3.49767	3.9565	China	3	Equidae	Equinae	Proboscidipparion	pater
Odessa 3	46.5	30.8	4.41533	3.49767	3.9565	Ukraine	2.33	Equidae	Equinae	Proboscidipparion	crassum
Aramis (Lower)	10.4771	40.4457	4.4	4.4	4.4	Ethiopia	1.89	Equidae		Eurygnathohippus	woldegabrieli
Southern Allia Bay Plains	3.634	36.264	4.35	3.94	4.145	Kenya	1.55	Equidae	Equinae	Hipparion	indet.
Asa Issie	10.1833	40.3333	4.187	3.596	3.8915	Ethiopia	1.69	Equidae		Eurygnathohippus	woldegabrieli
Tibet_Yuzhu	35.6472	94.0556	4.187	3.596	3.8915	China	2	Equidae	Equinae	Proboscidipparion	pater
Gona Western Margin 5	11.1333	40.3167	4.187	3.596	3.8915	Ethiopia	1.5	Equidae		Eurygnathohippus	woldegabrieli
Tibet_Zanda	31.5653	79.8481	4.187	3.596	3.8915	China	1.75	Equidae	Equinae	Plesiohipparion	zandaense
Kanapoi	2.5	36	4.17	4.07	4.12	Kenya	1.96	Equidae	Equinae	Hipparion	indet.
Kaiyumung	2.9019	36.0558	3.97	3	3.485	Kenya	2.05	Equidae	Equinae	Hipparion	indet.
Kaiyumung	2.9019	36.0558	3.97	3	3.485	Kenya	2.05	Equidae		Eurygnathohippus	indet.
Kaiyumung	2.9019	36.0558	3.97	3	3.485	Kenya	2.05	Equidae		Eurygnathohippus	indet.
Saketi_Upper	31.37	77.44	3.9565	2.58	3.26825	India	1.92	Equidae	Equinae	Hipparion	indet.
Lomekwi 6	3.9	35.75	3.94	3.6	3.77	Kenya	2	Equidae	Equinae	Eurygnatohippus	hasumense
Sibilot 1	3.70601	36.3454	3.94	3.6	3.77	Kenya	2.33	Equidae	Equinae	Eurygnatohippus	hasumense
Lebyazhje 1	51.5	77.2	3.9125	3.025	3.46875	Kazakhstan	2	Equidae	Equinae	Equus	indet.
Laetoli Beds (Upper Unit)	-3.36459	35.2126	3.85	3.63	3.74	Tanzania	1.85	Equidae		Eurygnathohippus	hasumense
Woranso-Mille	11.4667	40.5541	3.8	3.2	3.5	Ethiopia	1.86	Equidae		Eurygnathohippus	woldegabrieli
Laetoli_10	-3.5	35	3.8	3.5	3.65	Tanzania	2.33	Equidae	Hipparionini	Hipparion	indet.
Laetoli_9s	-3.5	35	3.8	3.5	3.65	Tanzania	2	Equidae	Hipparionini	Hipparion	indet.
Laetoli_22	-3.5	35	3.8	3.5	3.65	Tanzania	2	Equidae	Hipparionini	Hipparion	indet.
Laetoli_3	-3.5	35	3.8	3.5	3.65	Tanzania	1.89	Equidae	Hipparionini	Hipparion	indet.
Laetoli_11	-3.5	35	3.8	3.5	3.65	Tanzania	1.6	Equidae	Hipparionini	Hipparion	indet.
Laetoli_10W	-3.5	35	3.8	3.5	3.65	Tanzania	1.57	Equidae	Hipparionini	Hipparion	indet.
Laetoli_13	-3.5	35	3.8	3.5	3.65	Tanzania	2.5	Equidae	Hipparionini	Hipparion	indet.
Laetoli_12	-3.5	35	3.8	3.5	3.65	Tanzania	2	Equidae	Hipparionini	Hipparion	indet.
Laetoli_9	-3.5	35	3.8	3.5	3.65	Tanzania	1.9	Equidae	Hipparionini	Hipparion	indet.
Laetoli_8	-3.5	35	3.8	3.5	3.65	Tanzania	1.9	Equidae	Hipparionini	Hipparion	indet.
Laetoli_Upper Laetolil Beds	-3.25	35.1667	3.8	3.5	3.65	Tanzania	2	Equidae	Equinae	Hipparion	indet.
Laetoli_5	-3.5	35	3.8	3.5	3.65	Tanzania	1.8	Equidae	Hipparionini	Hipparion	indet.
Laetoli_4	-3.5	35	3.8	3.5	3.65	Tanzania	1.6	Equidae	Hipparionini	Hipparion	indet.
Laetoli_2	-3.5	35	3.8	3.5	3.65	Tanzania	2.1	Equidae	Hipparionini	Hipparion	indet.
Laetoli_7	-3.5	35	3.8	3.5	3.65	Tanzania	1.86	Equidae	Hipparionini	Hipparion	indet.
Gidhniya	28.0292	82.1667	3.6	0.0117	1.80585	Nepal	2.25	Equidae	Equinae	Equus	sivalensis
Chiwondo 1	-11.101	34.068	3.6	2.58	3.09	Malawi	2.57	Equidae		Eurygnathohippus	libycus
Chiwondo 1	-11.101	34.068	3.6	2.58	3.09	Malawi	2.57	Equidae	Equinae	Equus	numidicus
Tatrot	30.75	76.8333	3.6	2.58	3.09	India	1.87	Equidae	Hipparionini	Sivalhippus	theobaldi
Tatrot	30.75	76.8333	3.6	2.58	3.09	India	1.87	Equidae	Equinae	Cremohipparion	antelopinum
Bahrel Ghazal	15.967	18.867	3.6	2.58	3.09	Chad	2.17	Equidae	Equinae	Eurygnathohippus	afarense/hasumense
Matabaietu	10.75	40.55	3.6	2.58	3.09	Ethiopia	2.12	Equidae	Equinae	Eurygnathohippus	afarense
Albertine 3	1.75	30.917	3.6	2.58	3.09	Uganda	2.6	Equidae		Eurygnathohippus	woldegabrieli
Chiwondo 2 (Unit 3A)	-10.216	33.996	3.6	2.58	3.09	Malawi	2.59	Equidae	Equinae	Hipparion	indet.
Blassac la Girondie	45.09	3.2697	3.6	2.58	3.09	France	2.14	Equidae	Equinae	Equus	stenonis
Albertine 10	1.083	30.533	3.6	2.58	3.09	Uganda	2.5	Equidae	Equinae	Equus	indet.
Chiwondo 2 (Unit 3A)	-10.216	33.996	3.6	2.58	3.09	Malawi	2.59	Equidae	Equinae	Equus	indet.
Bel Hacel	35.85	0.483	3.6	2.58	3.09	Algeria	3	Equidae		Eurygnathohippus	libycus
Bel Hacel	35.85	0.483	3.6	2.58	3.09	Algeria	3	Equidae	Equinae	Equus	numidicus
Albertine 4	1.917	30.75	3.6	2.58	3.09	Uganda	2.5	Equidae		Eurygnathohippus	woldegabrieli
Albertine 4	1.917	30.75	3.6	2.58	3.09	Uganda	2.5	Equidae	Equinae	Equus	numidicus
Blassac la Girondie	45.09	3.2697	3.6	2.58	3.09	France	2.14	Equidae	Equinae	Equus	major
Usno 2	4.5	36	3.6	2.58	3.09	Ethiopia	1.68	Equidae		indet.	indet.
Rawi 1	0.416667	35	3.6	2.58	3.09	Kenya	2.11	Equidae		indet.	indet.
Usno	4.5	36	3.6	2.58	3.09	Ethiopia	1.79	Equidae	Equinae	Hipparion	sitifense
Ain el Hadj Baba	36.35	6.6	3.6	2.58	3.09	Algeria	3	Equidae	Equinae	Hipparion	sitifense
Omo 3	6	37	3.6	2.58	3.09	Ethiopia	2.13	Equidae	Equinae	Hipparion	indet.
Ain el Bey	36.2865	6.61843	3.6	2.58	3.09	Algeria	2	Equidae	Equinae	Hipparion	sitifense
Chiwondo (Mwimbi North)	-11.1	34.0667	3.6	2.58	3.09	Malawi	2.36	Equidae	Equinae	Hipparion	indet.
Omo 4	6	37	3.6	2.58	3.09	Ethiopia	2.5	Equidae	Equinae	Hipparion	indet.
Omo 2	6	37	3.6	2.58	3.09	Ethiopia	2.2	Equidae	Equinae	Hipparion	indet.
Omo 1	6	37	3.6	2.58	3.09	Ethiopia	2	Equidae	Equinae	Hipparion	indet.
Mursi	6	36	3.6	2.58	3.09	Ethiopia	2.2	Equidae		Sivalhippus	turkanense
Dikika	11.05	40.6667	3.6	3.26	3.43	Ethiopia	2.24	Equidae	Equinae	Eurygnathohippus	hasumense
Loruth Kaado 1	4.63529	35.744	3.6	3.4	3.5	Kenya	2.4	Equidae	Equinae	Eurygnathohippus	hasumense
Sibilot 3	3.7693	36.3459	3.6	3.4	3.5	Kenya	2.5	Equidae	Equinae	Eurygnathohippus	hasumense
Karari Ridge 1	4.20744	36.4258	3.6	3.4	3.5	Kenya	1.88	Equidae	Equinae	Eurygnathohippus	hasumense
Nasechebun 1	3.73877	35.8141	3.6	3.4	3.5	Kenya	2	Equidae	Equinae	Eurygnathohippus	hasumense
Makah Mera	11.5134	40.5158	3.6	3.6	3.6	Ethiopia	1.62	Equidae	\N	Eurygnathohippus	indet.
Korsi Dora	11.4815	40.5108	3.6	3.6	3.6	Ethiopia	2	Equidae	\N	Eurygnathohippus	indet.
Surai Khola 3	27.8833	82.8333	3.596	1.945	2.7705	Nepal	2.25	Equidae	Equinae	Equus	indet.
Lingtai-renjiagou	35	107.733	3.596	3.33	3.463	China	2.2	Equidae	Equinae	Plesiohipparion	houfenense
Irrawaddy 2	22.9333	94.1	3.55	0.0117	1.78085	Burma	2	Equidae	Equinae	Equus	yunnanensis
Q-Profil	40.15	21.2	3.55	0.5	2.025	Greece	2.5	Equidae	Equinae	Equus	stenonis
Pont de Gail	45.35	1.667	3.55	1.9	2.725	France	1.8	Equidae	Equinae	Proboscidipparion	crassum
Loshan	36.6667	49.5	3.55	1.9	2.725	Iran	3	Equidae		indet.	indet.
Polylakkos	40.15	21.2	3.55	1.9	2.725	Greece	2.2	Equidae	Equinae	Equus	altidens
Krimni (KRI)	40.3	23.3	3.55	1.9	2.725	Greece	2.2	Equidae	Equinae	Equus	stenonis
Tutak	38.6833	69.5	3.55	1.9	2.725	Tajikistan	3	Equidae	Equinae	Equus	stenonis
Obigarm1	38.7	69.5	3.55	1.9	2.725	Tajikistan	3	Equidae	Equinae	Equus	stenonis
Tsalka	41.575	44.0833	3.55	1.9	2.725	Georgia	2	Equidae	Equinae	Equus	altidens
Slivnitsa	42.85	23.033	3.55	1.9	2.725	Bulgaria	2.56	Equidae	Equinae	Equus	stenonis
Livakos (LIV)	40.15	21.2	3.55	1.9	2.725	Greece	1.89	Equidae	Equinae	Equus	altidens
Alikes (ALK)	39.15	22.45	3.55	1.9	2.725	Greece	3	Equidae	Equinae	Equus	stenonis
Selvella	44.2117	10.5628	3.55	1.9	2.725	Italy	2.5	Equidae	Equinae	Equus	altidens
Selvella	44.2117	10.5628	3.55	1.9	2.725	Italy	2.5	Equidae	Equinae	Equus	stenonis
Vill?ny 3	46.2	18.3	3.55	1.9	2.725	Hungary	2.11	Equidae	Equinae	Equus	indet.
Tourkovounia 3-5	38.5	23.45	3.55	1.9	2.725	Greece	1.67	Equidae	Equinae	Equus	indet.
Klochnevo 1 Eopleisto	52.45	107.55	3.55	1.9	2.725	Russia	2	Equidae	Equinae	Equus	sanmeniensis
Daodi_Laowogou_I	39.9	114.5	3.55	2.5	3.025	China	2	Equidae		Proboscidipparion	sinense
Las Higueruelas	38.9903	-4.08028	3.55	2.5	3.025	Spain	1.5	Equidae	Equinae	Plesiohipparion	rocinantis
La Higueruelas	39.47	-0.53	3.55	2.5	3.025	Spain	1.8	Equidae	Equinae	Plesiohipparion	rocinantis
Gulyazi	38.27	30.183	3.55	2.5	3.025	Turkey	2.22	Equidae	Equinae	Plesiohipparion	huangheese
Hu?lago	37.417	-3.25	3.55	2.5	3.025	Spain	2.25	Equidae	Equinae	Equus	livenzovensis
Iaras-1	45.8667	25.6	3.55	2.5	3.025	Romania	1.67	Equidae	Equinae	Proboscidipparion	crassum
Villaroya	42.08	-2.04	3.55	2.5	3.025	Spain	1.9	Equidae	Equinae	Plesiohipparion	rocinantis
Yuxian_Huabaogou_I	40.1	114.703	3.55	2.5	3.025	China	2	Equidae	Equinae	Plesiohipparion	houfenense
Valdeganga 1	39.15	-1.67	3.55	2.5	3.025	Spain	3	Equidae	Equinae	Equus	stenonis
Kisl?ng	46.58	18.23	3.55	2.5	3.025	Hungary	2.25	Equidae	Equinae	Equus	stenonis
Kisl?ng	46.58	18.23	3.55	2.5	3.025	Hungary	2.25	Equidae	Equinae	Equus	major
Kisl?ng	46.58	18.23	3.55	2.5	3.025	Hungary	2.25	Equidae	Equinae	Plesiohipparion	rocinantis
Kisl?ng	46.58	18.23	3.55	2.5	3.025	Hungary	2.25	Equidae	Equinae	Plesiohipparion	longipes
Kvabebi	42	46	3.55	2.5	3.025	Georgia	1.8	Equidae	Equinae	Plesiohipparion	rocinantis
El Rinc?n	38.917	-1.633	3.55	2.5	3.025	Spain	2	Equidae	Equinae	Equus	livenzovensis
Jingle-hefeng	38.3544	111.932	3.55	2.5	3.025	China	2.5	Equidae	Equinae	Plesiohipparion	houfenense
Ain Brimba	33	9	3.55	2.5	3.025	Tunisia	2.33	Equidae		Eurygnathohippus	libycus
Covrigi	44.75	23.167	3.55	2.5	3.025	Romania	1.5	Equidae	Equinae	Equus	indet.
Groserea	44.7167	23.4833	3.55	2.5	3.025	Romania	1.5	Equidae	Equinae	Equus	indet.
Damatria	36.15	28	3.55	2.5	3.025	Greece	2.33	Equidae	Equinae	Equus	indet.
Gerakarou 1 (GER)	40.38	23.4	3.55	2.725	3.1375	Greece	2.11	Equidae	Equinae	Equus	stenonis
Selim-Dzhevar	53.5	66.2	3.55	2.725	3.1375	Kazakhstan	1.8	Equidae	Equinae	Baryhipparion	tchicoicum
Pyrgos	37.6833	21.45	3.55	2.725	3.1375	Greece	2.6	Equidae	Equinae	Equus	stenonis
Pyrgos	37.6833	21.45	3.55	2.725	3.1375	Greece	2.6	Equidae	Equinae	Equus	stehlini
Vassiloudi (VSL)	40.3	23.3	3.55	2.725	3.1375	Greece	2.25	Equidae	Equinae	Equus	stenonis
Udunga	51.4	105.9	3.55	3.025	3.2875	Russia	1.92	Equidae	Equinae	Plesiohipparion	houfenense
Esekartkan	43.1	80.3	3.55	3.025	3.2875	Kazakhstan	1.82	Equidae	Equinae	Plesiohipparion	houfenense
Udunga	51.4	105.9	3.55	3.025	3.2875	Russia	1.92	Equidae	Equinae	Baryhipparion	tchicoicum
Laetoli_18	-3.5	35	3.5	2.4	2.95	Tanzania	2.5	Equidae	Equinae	Eurygnathohippus	ethiopicum
Laetoli_7E	-3.5	35	3.5	2.4	2.95	Tanzania	2.38	Equidae	Equinae	Eurygnathohippus	ethiopicum
Uttarbeni?Parmandal (lower)	33.6833	76.9167	3.5	2.5	3	India	2.5	Equidae	Equinae	Hipparion	indet.
Koro Toro	15.969	18.882	3.5	3	3.25	Chad	2.24	Equidae	Equinae	Eurygnathohippus	hasumense
Gulizindon	38.237	69.417	3.49767	2.58	3.03883	Tajikistan	2.25	Equidae	Equinae	Equus	stenonis
Beldersaj	41.1	70	3.49767	2.58	3.03883	Uzbekistan	2.67	Equidae	Equinae	Equus	stenonis
Nurnus	40.3	44.4	3.49767	2.58	3.03883	Armenia	2	Equidae	Hipparionini	Hipparion	indet.
Dzhylgyndykoo	42	77.5	3.49767	2.58	3.03883	Kyrgyzstan	3	Equidae	Hipparionini	Hipparion	indet.
Zhevakhova Gora	46.583	30.767	3.49767	2.58	3.03883	Ukraine	2.14	Equidae	Hipparionini	Hipparion	indet.
Zhdanov	47.2	37.2	3.49767	2.58	3.03883	Ukraine	2.2	Equidae	Equinae	Equus	indet.
Rostov (na Donu) - Taganrog	47.2333	39.7139	3.49767	2.58	3.03883	Russia	2.63	Equidae	Equinae	Equus	stenonis
Vinodelnoe (Kutsaj)	45.4	42.7	3.49767	2.58	3.03883	Russia	3	Equidae	Equinae	Equus	stenonis
Zhevakhova Gora	46.583	30.767	3.49767	2.58	3.03883	Ukraine	2.14	Equidae	Equinae	Equus	stenonis
Rostov (na Donu) - Taganrog	47.2333	39.7139	3.49767	2.58	3.03883	Russia	2.63	Equidae	Hipparionini	Hipparion	indet.
Ichketasma	42.7	78.3	3.49767	2.58	3.03883	Kyrgyzstan	2.67	Equidae	Equinae	Equus	stenonis
Shakhrizyabz	39.1	66.9	3.49767	2.58	3.03883	Uzbekistan	3	Equidae	Equinae	Equus	stenonis
Sidi Hakoma (Hadar)	11.107	40.4942	3.446	3.2	3.323	Ethiopia	2.04	Equidae		Eurygnathohippus	hasumense
Lomekwi	3.85155	35.7572	3.44	2.53	2.985	Kenya	2.06	Equidae	Equinae	Hipparion	indet.
Mien-Chih-Lok.39	35	112	3.4	0.7	2.05	China	3	Equidae		Proboscidipparion	sinense
Lomekwi 5	3.86667	35.75	3.4	2.52	2.96	Kenya	2.33	Equidae	Equinae	Eurygnathohippus	hasumense
Lomekwi 4	3.875	35.8022	3.4	2.52	2.96	Kenya	2.14	Equidae	Equinae	Eurygnathohippus	hasumense
Yushe-Mazegou	37	113	3.4	2.6	3	China	3	Equidae	Equinae	Hippotherium	weihoense
Lomekwi 9	3.86667	35.7667	3.4	2.6	3	Kenya	2.38	Equidae	Equinae	Eurygnathohippus	hasumense
Yuanmou-dabanguo	25.6667	101.167	3.4	2.6	3	China	1.75	Equidae	Equinae	Hipparion	indet.
Yushe-Mazegou	37	113	3.4	2.6	3	China	3	Equidae	Equinae	Plesiohipparion	houfenense
Youhe	34.5	109.5	3.4	2.6	3	China	2.2	Equidae		Proboscidipparion	pater
Youhe	34.5	109.5	3.4	2.6	3	China	2.2	Equidae	Equinae	Plesiohipparion	houfenense
Lomekwi 10	3.8632	35.7865	3.4	2.6	3	Kenya	2.67	Equidae	Equinae	Eurygnathohippus	hasumense
Il Naibar 3	4.055	36.3158	3.4	2.64	3.02	Kenya	2.35	Equidae	Equinae	Eurygnathohippus	ethiopicum
Il Naibar 3	4.055	36.3158	3.4	2.64	3.02	Kenya	2.35	Equidae		Eurygnathohippus	hasumense
Koobi Fora Ridge 1	3.94225	36.2445	3.4	2.64	3.02	Kenya	2.33	Equidae	Equinae	Equus	indet.
Sibilot 4	3.67789	36.292	3.4	2.64	3.02	Kenya	2.28	Equidae	Equinae	Eurygnathohippus	hasumense
Shungura B	4.9138	35.9683	3.4	2.85	3.125	Ethiopia	1.97	Equidae	Equinae	Hipparion	sitifense
Charyn lower	43.6	79.4	3.275	2.45	2.8625	Kazakhstan	2.5	Equidae	Equinae	Equus	stenonis
Shamar	50.104	106.192	3.275	2.725	3	Mongolia	2.2	Equidae	Equinae	Baryhipparion	tchicoicum
Shamar	50.104	106.192	3.275	2.725	3	Mongolia	2.2	Equidae	Equinae	Plesiohipparion	houfenense
Beteke	52	70	3.275	2.725	3	Kazakhstan	3	Equidae	Equinae	Baryhipparion	tchicoicum
Tologoj 1	51.75	107.3	3.275	2.725	3	Russia	3	Equidae	Hipparionini	Hipparion	indet.
Yakkabed	38.583	69.211	3.26825	2.58	2.92413	Tajikistan	2.36	Equidae	Equinae	Equus	stenonis
Smorgon' Akchagyl	54.3	27	3.2375	2.275	2.75625	Belarus	3	Equidae	Equinae	Equus	stenonis
Denen Dora (Hadar)	11.107	40.4942	3.2	3.18	3.19	Ethiopia	2.17	Equidae	Equinae	Eurygnathohippus	afarense
Denen Dora (Hadar)	11.107	40.4942	3.2	3.18	3.19	Ethiopia	2.17	Equidae		Eurygnathohippus	hasumense
Yuxian-Dongyaozitou	40.0903	114.723	3.032	2.581	2.8065	China	2.13	Equidae		Proboscidipparion	sinense
Yuxian-Dongyaozitou	40.0903	114.723	3.032	2.581	2.8065	China	2.13	Equidae	Equinae	Plesiohipparion	houfenense
Liventsovka (Rostov-on-Don)	47	40	3.025	1.9	2.4625	Russia	2	Equidae	Equinae	Equus	livenzovensis
Liventsovka (Rostov-on-Don)	47	40	3.025	1.9	2.4625	Russia	2	Equidae	Equinae	Equus	major
Beregovaya 1	50.542	106.914	3.025	2.5	2.7625	Russia	2	Equidae		Proboscidipparion	indet.
Beregovaya 1	50.542	106.914	3.025	2.5	2.7625	Russia	2	Equidae	Equinae	Baryhipparion	tchicoicum
Beregovaya 1	50.542	106.914	3.025	2.5	2.7625	Russia	2	Equidae	Equinae	Plesiohipparion	houfenense
Kopala 2	43.4	79	3	2.175	2.5875	Kazakhstan	2.5	Equidae	Equinae	Equus	stenonis
Saty upper	42.95	77.5	3	2.45	2.725	Kazakhstan	2.33	Equidae	Equinae	Equus	stenonis
Kuruksaj	38.4	69.7	3	2.45	2.725	Tajikistan	2	Equidae	Equinae	Equus	stenonis
Sesklon (SES)	39.15	22.45	3	2.6	3	Greece	2.2	Equidae	Equinae	Plesiohipparion	rocinantis
Kada Hadar	11.107	40.4942	2.88	2.7	2.79	Ethiopia	2.33	Equidae		Eurygnathohippus	hasumense
Kada Hadar	11.107	40.4942	2.88	2.7	2.79	Ethiopia	2.33	Equidae	Equinae	Eurygnathohippus	afarense
Shungura C	4.9138	35.9683	2.85	2.52	2.685	Ethiopia	2.22	Equidae	Equinae	Eurygnathohippus	sitifense
Shungura C	4.9138	35.9683	2.85	2.52	2.685	Ethiopia	2.22	Equidae	Equinae	Eurygnathohippus	aethiopicum
Oosterschelde	51.55	4	2.725	1.9	2.3125	Netherlands	1.86	Equidae	Equinae	Equus	indet.
Lomekwi 2	3.87925	35.8125	2.7	2.52	2.61	Kenya	3	Equidae	Equinae	Eurygnathohippus	hasumense
Il Naibar 4	4.055	36.32	2.64	1.78	2.21	Kenya	2.79	Equidae	Equinae	Equus	koobiforensis
Il Naibar 4	4.055	36.32	2.64	1.78	2.21	Kenya	2.79	Equidae	Equinae	Eurygnathohippus	ethiopicum
Northern Great Basin NB13C	38.5556	-121.469	2.63	0.9	1.765	USA	2.29	Equidae	Equinae	Equus	enormis
Southern Great Basin SB37D	32.1667	-106.833	2.63	0.9	1.765	USA	2.11	Equidae	Equinae	Equus	calobatus
Southern Great Basin SB37D	32.1667	-106.833	2.63	0.9	1.765	USA	2.11	Equidae	Equinae	Equus	scotti
Northern Great Basin NB13C	38.5556	-121.469	2.63	0.9	1.765	USA	2.29	Equidae	Equinae	Equus	simplicidens
Northern Great Basin NB13C	38.5556	-121.469	2.63	0.9	1.765	USA	2.29	Equidae	Equinae	Hippidion	indet.
Southern Great Basin SB58IIC	20.5667	-103.676	2.63	0.9	1.765	Mexico	2	Equidae	Equinae	Equus	simplicidens
Gulf Coast GC15D	28.1333	-81.6317	2.63	0.9	1.765	USA	1.57	Equidae	Equinae	Equus	indet.
Central Great Plains CP132C	39.0558	-95.6894	2.63	0.9	1.765	USA	2.83	Equidae	Equinae	Equus	simplicidens
Central Great Plains CP132C	39.0558	-95.6894	2.63	0.9	1.765	USA	2.83	Equidae	Equinae	Equus	scotti
Central Great Plains CP132C	39.0558	-95.6894	2.63	0.9	1.765	USA	2.83	Equidae	Equinae	Equus	calobatus
Southern Great Basin SB17	33.4485	-112.074	2.63	0.9	1.765	USA	2	Equidae	Equinae	Equus	indet.
Gulf Coast GC14A	30.23	-82.63	2.63	1.8	2.215	USA	2	Equidae	Equinae	Equus	simplicidens
Gulf Coast GC14A	30.23	-82.63	2.63	1.8	2.215	USA	2	Equidae	Equinae	Equus	scotti
Southern Great Basin SB36A	34.1667	-106.917	2.63	1.8	2.215	USA	2.67	Equidae	Equinae	Equus	scotti
Central Great Plains CP94	43.39	-98.36	2.63	1.8	2.215	USA	2.4	Equidae	Equinae	Equus	simplicidens
Southern Great Basin SB18B	33.4485	-112.074	2.63	1.8	2.215	USA	2.33	Equidae	Equinae	Nannippus	peninsulatus
Southern Great Basin SB36A	34.1667	-106.917	2.63	1.8	2.215	USA	2.67	Equidae	Equinae	Equus	simplicidens
Southern Great Basin SB31C	32.5	-109	2.63	1.8	2.215	USA	2.29	Equidae	Equinae	Nannippus	peninsulatus
Southern Great Basin SB31C	32.5	-109	2.63	1.8	2.215	USA	2.29	Equidae	Equinae	Equus	scotti
Southern Great Basin SB33C	35.2794	-106.971	2.63	1.8	2.215	USA	3	Equidae	Equinae	Equus	simplicidens
Southern Great Basin SB34IVA	35.6672	-105.964	2.63	1.8	2.215	USA	2.5	Equidae	Equinae	Nannippus	peninsulatus
Southern Great Basin SB14D	32.1136	-109.921	2.63	1.8	2.215	USA	2.6	Equidae	Equinae	Nannippus	peninsulatus
Southern Great Basin SB14D	32.1136	-109.921	2.63	1.8	2.215	USA	2.6	Equidae	Equinae	Equus	simplicidens
Southern Great Basin SB18A	33.4485	-112.074	2.63	1.8	2.215	USA	2.11	Equidae	Equinae	Equus	scotti
Gulf Coast GC14A	30.23	-82.63	2.63	1.8	2.215	USA	2	Equidae	Equinae	Nannippus	peninsulatus
Southern Great Basin SB18B	33.4485	-112.074	2.63	1.8	2.215	USA	2.33	Equidae	Equinae	Equus	scotti
Southern Great Basin SB18A	33.4485	-112.074	2.63	1.8	2.215	USA	2.11	Equidae	Equinae	Nannippus	peninsulatus
Southern Great Plains SP5	29.9106	-95.0609	2.63	1.8	2.215	USA	2.33	Equidae	Equinae	Nannippus	peninsulatus
Central Great Plains CP132A	39.0558	-95.6894	2.63	1.8	2.215	USA	2	Equidae	Equinae	Equus	simplicidens
Central Great Plains CP131	39.9236	-97.8214	2.63	1.8	2.215	USA	2.29	Equidae	Equinae	Equus	simplicidens
Central Great Plains CP95	43.2339	-99.4286	2.63	1.8	2.215	USA	3	Equidae	Equinae	Nannippus	indet.
Central Great Plains CP95	43.2339	-99.4286	2.63	1.8	2.215	USA	3	Equidae	Equinae	Equus	simplicidens
Southern Great Basin SB34IVA	35.6672	-105.964	2.63	1.8	2.215	USA	2.5	Equidae	Equinae	Equus	simplicidens
Central Great Plains CP97	43.21	-98.59	2.63	1.8	2.215	USA	2.4	Equidae	Equinae	Equus	simplicidens
Southern Great Basin SB38	33.25	-107.25	2.63	1.8	2.215	USA	2.6	Equidae	Equinae	Nannippus	peninsulatus
Central Great Plains CP132B	39.0558	-95.6894	2.63	1.8	2.215	USA	2.6	Equidae	Equinae	Equus	giganteus
Northern Great Basin NB35IIIC	39.1608	-119.754	2.63	1.8	2.215	USA	2.33	Equidae	Equinae	Equus	giganteus
Southern Great Plains SP5	29.9106	-95.0609	2.63	1.8	2.215	USA	2.33	Equidae	Equinae	Equus	simplicidens
Southern Great Basin SB34IVB	35.6672	-105.964	2.63	1.8	2.215	USA	2.67	Equidae	Equinae	Equus	scotti
Southern Great Basin SB37C	35.6672	-105.964	2.63	1.8	2.215	USA	2.5	Equidae	Equinae	Nannippus	peninsulatus
Gulf Coast GC16	27.7833	-82.6833	2.63	1.8	2.215	USA	2	Equidae	Equinae	Nannippus	peninsulatus
Gulf Coast GC18IIB	28.1333	-81.6317	2.63	1.8	2.215	USA	1.9	Equidae	Equinae	Equus	indet.
Gulf Coast GC15A	29.6167	-82.3667	2.63	1.8	2.215	USA	2	Equidae	Equinae	Equus	scotti
Gulf Coast GC17B	28.1333	-81.6317	2.63	1.8	2.215	USA	2	Equidae	Equinae	Equus	indet.
Gulf Coast GC17A	27.3667	-82.45	2.63	1.8	2.215	USA	2	Equidae	Equinae	Nannippus	peninsulatus
Gulf Coast GC18IIA	28.1333	-81.6317	2.63	1.8	2.215	USA	3	Equidae	Equinae	Equus	indet.
Gulf Coast GC17B	28.1333	-81.6317	2.63	1.8	2.215	USA	2	Equidae	Equinae	Nannippus	peninsulatus
Gulf Coast GC17A	27.3667	-82.45	2.63	1.8	2.215	USA	2	Equidae	Equinae	Equus	indet.
Southern Great Basin SB14F	32.1136	-109.921	2.63	1.8	2.215	USA	2.38	Equidae	Equinae	Equus	anguinus
Pacific Northwest PN23C	43.6137	-116.238	2.63	1.8	2.215	USA	2.13	Equidae	Equinae	Equus	anguinus
Southern Great Basin SB14F	32.1136	-109.921	2.63	1.8	2.215	USA	2.38	Equidae	Equinae	Equus	idahoensis
Gulf Coast GC15A	29.6167	-82.3667	2.63	1.8	2.215	USA	2	Equidae	Equinae	Equus	simplicidens
Southern Great Basin SB14E	33.4485	-112.074	2.63	1.8	2.215	USA	2.33	Equidae	Equinae	Equus	anguinus
Gulf Coast GC15A	29.6167	-82.3667	2.63	1.8	2.215	USA	2	Equidae	Equinae	Cormohipparion	emsliei
Gulf Coast GC15A	29.6167	-82.3667	2.63	1.8	2.215	USA	2	Equidae	Equinae	Nannippus	peninsulatus
Southern Great Basin SB36B	35.6672	-105.964	2.63	1.8	2.215	USA	2.2	Equidae	Equinae	Equus	calobatus
Southern Great Basin SB36B	35.6672	-105.964	2.63	1.8	2.215	USA	2.2	Equidae	Equinae	Nannippus	peninsulatus
Southern Great Basin SB36B	35.6672	-105.964	2.63	1.8	2.215	USA	2.2	Equidae	Equinae	Equus	scotti
Southern Great Basin SB38	33.25	-107.25	2.63	1.8	2.215	USA	2.6	Equidae	Equinae	Equus	scotti
Southern Great Basin SB38	33.25	-107.25	2.63	1.8	2.215	USA	2.6	Equidae	Equinae	Equus	calobatus
Southern Great Plains SP5	29.9106	-95.0609	2.63	1.8	2.215	USA	2.33	Equidae	Equinae	Equus	cumminsi
Southern Great Plains SP1H	34.97	-101.9	2.63	1.8	2.215	USA	2.6	Equidae	Equinae	Nannippus	peninsulatus
Southern Great Basin SB49	30.2672	-97.7639	2.63	1.8	2.215	USA	2.29	Equidae	Equinae	Equus	simplicidens
Southern Great Basin SB50	30.75	-105	2.63	1.8	2.215	USA	2.2	Equidae	Equinae	Equus	simplicidens
Southern Great Basin SB50	30.75	-105	2.63	1.8	2.215	USA	2.2	Equidae	Equinae	Equus	cumminsi
Southern Great Basin SB49	30.2672	-97.7639	2.63	1.8	2.215	USA	2.29	Equidae	Equinae	Nannippus	peninsulatus
Southern Great Basin SB49	30.2672	-97.7639	2.63	1.8	2.215	USA	2.29	Equidae	Equinae	Equus	cumminsi
Southern Great Basin SB50	30.75	-105	2.63	1.8	2.215	USA	2.2	Equidae	Equinae	Equus	scotti
Central Great Plains CP131II	39.0558	-95.6894	2.63	1.8	2.215	USA	3	Equidae	Equinae	Equus	cumminsi
Central Great Plains CP121	40.8099	-96.6753	2.63	1.8	2.215	USA	2.4	Equidae	Equinae	Nannippus	peninsulatus
Northern Great Basin NB36IIIA	39.1608	-119.754	2.63	1.8	2.215	USA	3	Equidae	Equinae	Equus	idahoensis
Northern Great Basin NB36IIIA	39.1608	-119.754	2.63	1.8	2.215	USA	3	Equidae	Equinae	Equus	cumminsi
Central Great Plains CP81	39.7392	-104.985	2.63	1.8	2.215	USA	3	Equidae	Equinae	Equus	cumminsi
Southern Great Basin SB68	21.8833	-102.3	2.63	1.8	2.215	Mexico	2	Equidae	Equinae	Equus	conversidens
Southern Great Plains SP1H	34.97	-101.9	2.63	1.8	2.215	USA	2.6	Equidae	Equinae	Equus	simplicidens
Southern Great Plains SP1H	34.97	-101.9	2.63	1.8	2.215	USA	2.6	Equidae	Equinae	Equus	cumminsi
Southern Great Basin SB18II	33.4485	-112.074	2.63	1.8	2.215	USA	2	Equidae	Equinae	Equus	indet.
Southern Great Basin SB18C	33.4485	-112.074	2.63	1.8	2.215	USA	3	Equidae	Equinae	Equus	indet.
Central Great Plains CP96	43.7683	-103.597	2.63	1.8	2.215	USA	2.67	Equidae	Equinae	Equus	indet.
Gulf Coast GC15C	28.1333	-81.6317	2.63	1.8	2.215	USA	1.91	Equidae	Equinae	Equus	indet.
Gulf Coast GC15B	28.1333	-81.6317	2.63	1.8	2.215	USA	2	Equidae	Equinae	Equus	indet.
Central Great Plains CP121	40.8099	-96.6753	2.63	1.8	2.215	USA	2.4	Equidae	Equinae	Equus	simplicidens
Central Great Plains CP121	40.8099	-96.6753	2.63	1.8	2.215	USA	2.4	Equidae	Equinae	Equus	idahoensis
Chutoulang_Xiaonanshan	42.3289	118.652	2.6	1.65	2.125	China	2.13	Equidae		Proboscidipparion	sinense
Chutoulang_Xiaonanshan	42.3289	118.652	2.6	1.65	2.125	China	2.13	Equidae	Equinae	Equus	sanmeniensis
Pinjor	33.0903	73.5833	2.581	0.520667	1.55083	India	2.03	Equidae	Equinae	Equus	sivalensis
Pinjor	33.0903	73.5833	2.581	0.520667	1.55083	India	2.03	Equidae	Equinae	Equus	namadicus
Yuanmo-hominid	25.7	101.883	2.581	0.781	1.681	China	1.7	Equidae	Equinae	Equus	yunnanensis
Dodogol 1	51	108	2.581	0.781	1.681	Russia	3	Equidae	Equinae	Equus	indet.
Kudun	52	110	2.581	0.781	1.681	Russia	3	Equidae	Equinae	Equus	sanmeniensis
Nihewan_Hongya	40.1361	114.659	2.581	1.945	2.263	China	3	Equidae	Equinae	Hipparion	indet.
Dafnero (DFN)	40.1722	21.5921	2.581	2.263	2.422	Greece	2.13	Equidae	Equinae	Equus	stenonis
Montopoli	43.5	11	2.581	2.32	2.4505	Italy	1.83	Equidae	Equinae	Hipparion	indet.
Montopoli	43.5	11	2.581	2.32	2.4505	Italy	1.83	Equidae	Equinae	Equus	livenzovensis
Mumbwa	-15.1833	26.2833	2.58	0	1.29	Zimbabwe	2.58	Equidae	Equinae	Equus	plicatus
Wonderwerk	-27.8333	23.55	2.58	0	1.29	South Africa	2.8	Equidae	Equinae	Equus	plicatus
Wonderwerk	-27.8333	23.55	2.58	0	1.29	South Africa	2.8	Equidae	Equinae	Equus	helmei
Wonderwerk	-27.8333	23.55	2.58	0	1.29	South Africa	2.8	Equidae	Equinae	Equus	quagga
Wonderwerk	-27.8333	23.55	2.58	0	1.29	South Africa	2.8	Equidae	Equinae	Equus	burchellii
Broken Hill	-14.4167	28.55	2.58	0	1.29	Zambia	2.47	Equidae	Equinae	Equus	burchellii
Taijiaping_Xinyaozi	40.4192	114.085	2.58	1.29585	1.93792	China	3	Equidae		Proboscidipparion	sinense
Taijiaping_Xinyaozi	40.4192	114.085	2.58	1.29585	1.93792	China	3	Equidae	Equinae	Equus	sanmeniensis
Nihewan_shigou	40.2317	114.672	2.58	1.29585	1.93792	China	2.4	Equidae	Equinae	Equus	huanghoensis
Chutoulang_Dongliang	42.3081	118.623	2.58	1.7239	2.15195	China	2.83	Equidae	Equinae	Equus	sanmeniensis
Chutoulang_Dongcun	42.3208	118.64	2.58	1.7239	2.15195	China	2.38	Equidae		Proboscidipparion	sinense
Chutoulang_Dongliang	42.3081	118.623	2.58	1.7239	2.15195	China	2.83	Equidae		Proboscidipparion	sinense
Chutoulang_Dongliang	42.3081	118.623	2.58	1.7239	2.15195	China	2.83	Equidae	Equinae	Hipparion	indet.
Chutoulang_Dongcun	42.3208	118.64	2.58	1.7239	2.15195	China	2.38	Equidae	Equinae	Hipparion	indet.
Chutoulang_Dongcun	42.3208	118.64	2.58	1.7239	2.15195	China	2.38	Equidae	Equinae	Equus	sanmeniensis
Shuichongkou_Xinyaozi	40.4192	114.085	2.58	1.7239	2.15195	China	2.8	Equidae	Equinae	Plesiohipparion	houfenense
Nihewan_Houshishan	40.2	114.65	2.58	1.7239	2.15195	China	3	Equidae	Equinae	Equus	sanmeniensis
Shuichongkou_Xinyaozi	40.4192	114.085	2.58	1.7239	2.15195	China	2.8	Equidae	Equinae	Equus	sanmeniensis
Nihewan_Shanshenmiaozui	40.2189	114.666	2.58	1.7239	2.15195	China	2.5	Equidae	Equinae	Hipparion	indet.
Nihewan_Shanshenmiaozui	40.2189	114.666	2.58	1.7239	2.15195	China	2.5	Equidae	Equinae	Equus	sanmeniensis
Ain Jourdel	36.183	5.4	2.58	1.8	2.19	Algeria	2.29	Equidae	Equinae	Hipparion	sitifense
Ain Jourdel	36.183	5.4	2.58	1.8	2.19	Algeria	2.29	Equidae		Eurygnathohippus	libycus
Ain Jourdel	36.183	5.4	2.58	1.8	2.19	Algeria	2.29	Equidae	Equinae	Equus	tabeti
Ain Jourdel	36.183	5.4	2.58	1.8	2.19	Algeria	2.29	Equidae	Equinae	Equus	numidicus
Klochnevo I-1	52	107	2.58	1.8	2.19	Russia	2	Equidae	Equinae	Equus	sanmeniensis
Kangatukuseo II	3.864	35.8139	2.57	2.47	2.52	Kenya	2.53	Equidae	Equinae	Eurygnathohippus	hasumense
Lomekwi 1	3.87919	35.8104	2.57	2.47	2.52	Kenya	2.37	Equidae	Equinae	Eurygnathohippus	hasumense
Lokalalei 1	3.95341	35.788	2.53	2.34	2.435	Kenya	2.6	Equidae	Equinae	Eurygnathohippus	ethiopicum
Lokalalei 1	3.95341	35.788	2.53	2.34	2.435	Kenya	2.6	Equidae	Equinae	Equus	indet.
Kalochoro IV	4.06975	35.8456	2.53	2.4	2.465	Kenya	3	Equidae	Equinae	Eurygnathohippus	ethiopicum
Shungura D	4.9138	35.9683	2.52	2.4	2.46	Ethiopia	2.09	Equidae		indet.	indet.
La Puebla de Valverde	40.2	-0.9	2.5	1.9	2.2	Spain	2	Equidae	Equinae	Equus	stenonis
Almenara-Casablanca 1	40.17	-0.17	2.5	1.9	2.2	Spain	2.29	Equidae	Equinae	Equus	stenonis
Saint Vallier Banc LD3	45.1667	4.8167	2.5	1.9	2.2	France	1.6	Equidae		Equus	stenonis
Saint Vallier Banc LD3	45.1667	4.8167	2.5	1.9	2.2	France	1.6	Equidae	Equinae	Equus	stenonis
Volax (VOL)	41.15	25.3	2.5	1.9	2.2	Greece	2.29	Equidae	Equinae	Equus	stenonis
Vatera (VTR)	39.2614	26.2786	2.5	1.9	2.2	Greece	2.22	Equidae	Equinae	Equus	stenonis
Sesklon (SES)	39.15	22.45	2.5	1.9	2.2	Greece	2.2	Equidae	Equinae	Equus	stenonis
Saint Arnaud	36.08	5.4	2.5	1.9	2.2	Algeria	2.5	Equidae	Equinae	Eurygnathohippus	sitifense
Saint Arnaud	36.08	5.4	2.5	1.9	2.2	Algeria	2.5	Equidae		Eurygnathohippus	libycus
Chilhac	45.09	3.27	2.5	1.9	2.2	France	2	Equidae	Equinae	Equus	stenonis
Podpusk-Lebyazhje	51.3	77.988	2.5	1.9	2.2	Kazakhstan	2.38	Equidae	Equinae	Equus	livenzovensis
Adyrgan	43.05	80.2	2.5	1.9	2.2	Kazakhstan	2.4	Equidae	Equinae	Equus	stenonis
Valdeganga 3	38.83	-2	2.5	1.9	2.2	Spain	3	Equidae	Equinae	Equus	stenonis
Pietris	44.53	24	2.5	1.9	2.2	Romania	2	Equidae	Equinae	Equus	stenonis
Sarikol Tepe (Sinap 82)	40.56	32.71	2.5	1.9	2.2	Turkey	3	Equidae	Equinae	Equus	stenonis
Longdan	35.5167	103.5	2.5	1.9	2.2	China	1.88	Equidae	Equinae	Equus	eisenmannae
Asagicobanisa 4	38.549	27.562	2.5	1.9	2.2	Turkey	3	Equidae	Equinae	Equus	indet.
Nihewan_Xiashagou	40.1667	114.167	2.5	1.9	2.2	China	2.45	Equidae	Equinae	Equus	sanmeniensis
zhoukoudian_Loc18	39.6667	115.917	2.5	1.9	2.2	China	2	Equidae	Equinae	Equus	sanmeniensis
Ain Boucherit	35.419	4.136	2.5	1.9	2.2	Algeria	2.67	Equidae	Equinae	Equus	numidicus
Nihewan_Xiashagou	40.1667	114.167	2.5	1.9	2.2	China	2.45	Equidae	Equinae	Equus	teilhardi
Saint Arnaud	36.08	5.4	2.5	1.9	2.2	Algeria	2.5	Equidae	Equinae	Equus	numidicus
Ain Boucherit	35.419	4.136	2.5	1.9	2.2	Algeria	2.67	Equidae		Eurygnathohippus	libycus
Coupet	45.08	3.33	2.5	1.9	2.2	France	1.92	Equidae	Equinae	Equus	stenonis
Coupet	45.08	3.33	2.5	1.9	2.2	France	1.92	Equidae	Equinae	Equus	major
Pardines	45.3	3.1	2.5	1.9	2.2	France	2	Equidae	Equinae	Equus	bressanus
Coupet	45.08	3.33	2.5	1.9	2.2	France	1.92	Equidae	Equinae	Equus	stenonis
Asagicobanisa 1	38.551	27.569	2.5	1.9	2.2	Turkey	3	Equidae	Equinae	Equus	indet.
Pardines	45.3	3.1	2.5	1.9	2.2	France	2	Equidae	Equinae	Equus	livenzovensis
Saint Vallier Banc LD2	45.1667	4.8167	2.5	1.9	2.2	France	2	Equidae	Equinae	Equus	stenonis
Varshets	43.195	23.286	2.5	1.9	2.2	Bulgaria	2.2	Equidae	Equinae	Equus	stenonis
Krestovka	68.117	157.7	2.5	1.9	2.2	Russia	3	Equidae	Equinae	Equus	verae
Saint Vallier	45.167	4.817	2.5	1.9	2.2	France	1.88	Equidae	Equinae	Equus	stenonis
Roccaneyra	45.55	3.217	2.5	2.5	2.5	France	2.25	Equidae	Equinae	Hipparion	indet.
Hata (Bouri Fm.)	10.2661	40.5686	2.5	2.5	2.5	Ethiopia	2.44	Equidae	Equinae	Hipparion	indet.
Roccaneyra	45.55	3.217	2.5	2.5	2.5	France	2.25	Equidae	Hipparionini	indet.	indet.
Charyn upper	43.6	79.4	2.45	2.175	2.3125	Kazakhstan	2	Equidae	Equinae	Equus	stenonis
Shungura E	4.9138	35.9683	2.4	2.36	2.38	Ethiopia	1.96	Equidae		Eurygnathohippus	ethiopicus
Shungura E	4.9138	35.9683	2.4	2.36	2.38	Ethiopia	1.96	Equidae	Equinae	Eurygnathohippus	sitifense
Shungura F	4.9138	35.9683	2.36	2.33	2.345	Ethiopia	2.13	Equidae		Eurygnathohippus	cornelianus
Shungura F	4.9138	35.9683	2.36	2.33	2.345	Ethiopia	2.13	Equidae	Equinae	Equus	oldowayensis
Shungura F	4.9138	35.9683	2.36	2.33	2.345	Ethiopia	2.13	Equidae		Eurygnathohippus	woldegabrieli
Kalakodo	4.06565	35.8182	2.33	1.87	2.1	Kenya	2.7	Equidae	Equinae	Eurygnathohippus	ethiopicum
Kalakodo	4.06565	35.8182	2.33	1.87	2.1	Kenya	2.7	Equidae	Equinae	Equus	indet.
Shungura G	4.9138	35.9683	2.33	1.9	2.115	Ethiopia	2.16	Equidae		Eurygnathohippus	cornelianus
Shungura G	4.9138	35.9683	2.33	1.9	2.115	Ethiopia	2.16	Equidae	Equinae	Equus	oldowayensis
Shungura G	4.9138	35.9683	2.33	1.9	2.115	Ethiopia	2.16	Equidae		Eurygnathohippus	woldegabrieli
Kangaki 1 and 2	3.98507	35.7855	2.33	2.06	2.195	Kenya	2.64	Equidae	Equinae	Eurygnathohippus	ethiopicum
Kangaki 1 and 2	3.98507	35.7855	2.33	2.06	2.195	Kenya	2.64	Equidae	Equinae	Equus	indet.
Coste San Giacomo	42	14.4167	2.23	2.2	2.215	Italy	2	Equidae	Equinae	Equus	senezensis
Podpusk-Lebyazhje 2	51.3	77.988	2.2	1.9	2.05	Kazakhstan	2.2	Equidae	Equinae	Equus	stenonis
Sen?ze	45.241	3.483	2.2	2.1	2.15	France	2	Equidae	Equinae	Equus	senezensis
Sen?ze	45.241	3.483	2.2	2.1	2.15	France	2	Equidae	Equinae	Equus	major
Ahl al Oughlam	33.567	-7.55	2.19	1.8	1.995	Morocco	2.23	Equidae	Equinae	Eurygnathohippus	pomeli
Kanjera 2	0.383333	35	2.148	1.945	2.0465	Kenya	2.58	Equidae	Hipparionini	Hipparion	indet.
Kanjera 2	0.383333	35	2.148	1.945	2.0465	Kenya	2.58	Equidae	Equinae	Equus	indet.
Pantalla	42.8742	12.4003	2.138	1.778	1.958	Italy	2.2	Equidae	Equinae	Equus	stenonis
Olivola	44.4167	10	2.138	1.981	2.0595	Italy	2	Equidae	Equinae	Equus	stenonis
Malapa	-26.2769	28.1019	2.128	1.88933	2.00867	South Africa	2.2	Equidae	Equinae	Equus	indet.
Ust-Obor	52.3	109	2.10625	1.7239	1.91508	Russia	3	Equidae	Equinae	Equus	sanmeniensis
Uttarbeni?Parmandal (upper)	33.6833	76.9167	2	1	1.5	India	2.6	Equidae	Equinae	Equus	sivalensis
Koobi Fora Ridge 2	3.9563	36.3009	2	1.86	1.93	Kenya	2.29	Equidae	Equinae	Eurygnathohippus	ethiopicum
Koobi Fora Ridge 2	3.9563	36.3009	2	1.86	1.93	Kenya	2.29	Equidae	Equinae	Equus	koobiforensis
Karari Ridge 2	4.07378	36.3616	2	1.88	1.94	Kenya	2.32	Equidae	Equinae	Equus	koobiforensis
Karari Ridge 2	4.07378	36.3616	2	1.88	1.94	Kenya	2.32	Equidae	Equinae	Eurygnathohippus	ethiopicum
Karari Ridge 2	4.07378	36.3616	2	1.88	1.94	Kenya	2.32	Equidae		Eurygnathohippus	cornelianus
Karari Ridge 2	4.07378	36.3616	2	1.88	1.94	Kenya	2.32	Equidae	Equinae	Eurygnathohippus	hasumense
Ubeidiya	32.6667	35.5833	1.981	1.2	1.5905	Israel	2.06	Equidae	Equinae	Equus	tabeti
Matassino	43.3333	11.0833	1.981	1.88933	1.93517	Italy	2	Equidae	Equinae	Equus	stenonis
Il Dura (Koobi Fora)	3.30848	36.3297	1.95	1.78	1.865	Kenya	2.5	Equidae	Equinae	Equus	koobiforensis
Il Dura (Koobi Fora)	3.30848	36.3297	1.95	1.78	1.865	Kenya	2.5	Equidae	Equinae	Eurygnathohippus	ethiopicum
Binagady old (Baku)	40.4	49.75	1.945	0.781	1.363	Azerbaijan	3	Equidae	Equinae	Proboscidipparion	crassum
Binagady old (Baku)	40.4	49.75	1.945	0.781	1.363	Azerbaijan	3	Equidae	Hipparionini	Hipparion	indet.
Fuente Nueva-3	37.719	-2.406	1.945	0.781	1.363	Spain	2.33	Equidae	Equinae	Equus	suessenbornensis
Fuente Nueva-3	37.719	-2.406	1.945	0.781	1.363	Spain	2.33	Equidae	Equinae	Equus	altidens
Tash-Kala	43.3	45.7	1.945	0.781	1.363	Russia	3	Equidae	Equinae	Equus	indet.
Yuxian_Danangou_Nihewan	40.1011	114.726	1.945	1.778	1.8615	China	2.5	Equidae		Proboscidipparion	sinense
Yuxian_Danangou_Nihewan	40.1011	114.726	1.945	1.778	1.8615	China	2.5	Equidae	Equinae	Hipparion	indet.
Poggio Rosso	43.6258	11.4847	1.945	1.778	1.8615	Italy	1.86	Equidae	Equinae	Equus	stenonis
Yuxian_Danangou_Nihewan	40.1011	114.726	1.945	1.778	1.8615	China	2.5	Equidae	Equinae	Equus	sanmeniensis
Casa Frata	43.3333	11.0833	1.945	1.778	1.8615	Italy	2.11	Equidae	Equinae	Equus	stehlini
Nihewan_Yangshuizhan II	40.2186	114.66	1.945	1.778	1.8615	China	3	Equidae	Equinae	Equus	sanmeniensis
Manonga 4	-3.85	33.717	1.9	0	0.95	Tanzania	2.91	Equidae	Equinae	Equus	burchellii
Swartkrans 2	-26.0836	27.7667	1.9	0.0117	0.95585	South Africa	2.31	Equidae	Equinae	Equus	capensis
Swartkrans 1 (Lower bank)	-26.0833	27.7667	1.9	0.0117	0.95585	South Africa	2.27	Equidae		Eurygnathohippus	libycus
Dakhleh Oasis	25.8333	29	1.9	0.0117	0.95585	Egypt	2.71	Equidae	Equinae	Equus	capensis
Swartkrans 2	-26.0836	27.7667	1.9	0.0117	0.95585	South Africa	2.31	Equidae		Eurygnathohippus	libycus
Swartkrans 1 (Hanging Remnant)	-26.0833	27.7667	1.9	0.0117	0.95585	South Africa	2.23	Equidae		Eurygnathohippus	libycus
Swartkrans 1 (Hanging Remnant)	-26.0833	27.7667	1.9	0.0117	0.95585	South Africa	2.23	Equidae	Equinae	Equus	capensis
Son	25.5886	83.7803	1.9	0.0117	0.95585	India	2.29	Equidae	Equinae	Equus	hemionus
Grosse Grotte (Blaubeuren)	48.4119	9.7844	1.9	0.0117	0.95585	Germany	2.57	Equidae	Equinae	Equus	ferus
Dursunlu	38.377	31.769	1.9	0.0117	0.95585	Turkey	2.4	Equidae	Equinae	Equus	indet.
Sultaniye	37.778	27.412	1.9	0.0117	0.95585	Turkey	3	Equidae	Equinae	Equus	indet.
Tasova Derek?y	40.272	36.379	1.9	0.0117	0.95585	Turkey	3	Equidae	Equinae	Equus	indet.
HRD	11	42.833	1.9	0.0117	0.95585	Djibouti	2.5	Equidae	Equinae	Equus	indet.
Swartkrans 3	-26.0833	27.7669	1.9	0.0117	0.95585	South Africa	2.38	Equidae	Equinae	Equus	capensis
Kamisli 1	40.729	35.418	1.9	0.0117	0.95585	Turkey	2.5	Equidae	Equinae	Equus	indet.
Swartkrans 1 (Lower bank)	-26.0833	27.7667	1.9	0.0117	0.95585	South Africa	2.27	Equidae	Equinae	Equus	capensis
Swartkrans 3	-26.0833	27.7669	1.9	0.0117	0.95585	South Africa	2.38	Equidae		Eurygnathohippus	libycus
An Nafud 1	27.833	39.167	1.9	0.0117	0.95585	Saudi Arabia	2.67	Equidae	Equinae	Equus	indet.
West Turkana 9	4.333	35.867	1.9	0.0117	0.95585	Kenya	2.59	Equidae	Equinae	Equus	indet.
An Nafud 2	27.417	39.333	1.9	0.0117	0.95585	Saudi Arabia	3	Equidae	Equinae	Equus	indet.
Asagiyavucuk	40.99	35.721	1.9	0.0117	0.95585	Turkey	3	Equidae	Equinae	Equus	indet.
Suluova	40.814	35.603	1.9	0.0117	0.95585	Turkey	3	Equidae	Equinae	Equus	indet.
Kamisli 2	40.729	35.421	1.9	0.0117	0.95585	Turkey	3	Equidae	Equinae	Equus	indet.
Kanam East (Apoko)	0.334167	34.4833	1.9	0.0117	0.95585	Kenya	2.5	Equidae	Equinae	Equus	indet.
Kanam East (Kasibos)	0.333611	34.4836	1.9	0.0117	0.95585	Kenya	2.67	Equidae	Equinae	Equus	indet.
Atapuerca E-19	42.3333	-3.5	1.9	0.0117	0.95585	Spain	2.5	Equidae	Equinae	Equus	indet.
Atapuerca E-9	42.3333	-3.5	1.9	0.0117	0.95585	Spain	1.67	Equidae	Equinae	Equus	indet.
Kesem-Kebena 6	9.5	40	1.9	0.0117	0.95585	Ethiopia	2.86	Equidae	Equinae	Equus	indet.
Atapuerca E-14	42.3333	-3.5	1.9	0.0117	0.95585	Spain	1.6	Equidae	Equinae	Equus	indet.
El-Kherba	35.4167	4.13333	1.9	0.0117	0.95585	Algeria	3	Equidae	Equinae	Equus	tabeti
El-Kherba	35.4167	4.13333	1.9	0.0117	0.95585	Algeria	3	Equidae	Equinae	Equus	numidicus
Oulad Hamida 1 (HEC)	33.5667	-7.55111	1.9	0.0117	0.95585	Morocco	2.67	Equidae	Equinae	Equus	mauritanicus
Thomas Quarry 1 (HEC)	33.5667	-7.55167	1.9	0.0117	0.95585	Morocco	2.67	Equidae	Equinae	Equus	mauritanicus
El Geffel	36.6	10.8711	1.9	0.0117	0.95585	Tunisia	3	Equidae	Equinae	Equus	mauritanicus
Kangera	-1.00139	33.0833	1.9	0.0117	0.95585	Kenya	2.3	Equidae	Equinae	Hipparion	indet.
Kangera	-1.00139	33.0833	1.9	0.0117	0.95585	Kenya	2.3	Equidae	Equinae	Equus	indet.
Narbada and Godavari	28	80	1.9	0.0117	0.95585	India	2.38	Equidae	Equinae	Equus	namadicus
Tamil Nadu	10.98	78.4922	1.9	0.0117	0.95585	India	3	Equidae	Equinae	Equus	namadicus
Manjra	21.1539	72.8944	1.9	0.0117	0.95585	India	2.09	Equidae	Equinae	Equus	namadicus
Godavari	17.2253	79.6178	1.9	0.0117	0.95585	India	2.63	Equidae	Equinae	Equus	namadicus
West Bengal	22.9836	87.8603	1.9	0.0117	0.95585	India	2.09	Equidae	Equinae	Equus	namadicus
Ganga	26.7611	81.77	1.9	0.0117	0.95585	India	2.71	Equidae	Equinae	Equus	hemionus
Atapuerca TD4	42.3333	-3.5	1.9	0.0117	0.95585	Spain	1.86	Equidae	Equinae	Equus	indet.
Sagileru	17.0214	80.0975	1.9	0.0117	0.95585	India	2.25	Equidae	Equinae	Equus	indet.
Irrawady 3	22.9167	94.1	1.9	0.0117	0.95585	Burma	2.33	Equidae	Equinae	Equus	indet.
Ganga	26.7611	81.77	1.9	0.0117	0.95585	India	2.71	Equidae	Equinae	Equus	indet.
Qaleh Jogh	35.3	58.9333	1.9	0.0117	0.95585	Iran	2	Equidae	Equinae	Equus	indet.
Zavieh	34.95	50.5	1.9	0.0117	0.95585	Iran	3	Equidae	Equinae	Equus	indet.
Binagady	40.4761	49.8486	1.9	0.0117	0.95585	Azerbaijan	2.55	Equidae	Equinae	Equus	ferus
Son	25.5886	83.7803	1.9	0.0117	0.95585	India	2.29	Equidae	Equinae	Equus	namadicus
Binagady	40.4761	49.8486	1.9	0.0117	0.95585	Azerbaijan	2.55	Equidae	Equinae	Equus	hydruntinus
Binagady	40.4761	49.8486	1.9	0.0117	0.95585	Azerbaijan	2.55	Equidae	Equinae	Equus	hemionus
Nelsen Bay Cave	-34.017	23.383	1.9	0.0117	0.95585	South Africa	3	Equidae	Equinae	Equus	quagga
Cueto de La Mina	43.45	-5.18333	1.9	0.0117	0.95585	Spain	2.43	Equidae	Equinae	Equus	ferus
Hopefield	-33.05	18.3667	1.9	0.0117	0.95585	South Africa	2.44	Equidae	Equinae	Equus	plicatus
Transbaikalian (UPC)	52.0333	110.15	1.9	0.0117	0.95585	Russia	2.71	Equidae	Equinae	Equus	ferus
Narmada	22.8206	77.8539	1.9	0.0117	0.95585	India	2.35	Equidae	Equinae	Equus	namadicus
Qaleh Bozi	32.4	51.55	1.9	0.0117	0.95585	Iran	3	Equidae	Equinae	Equus	hydruntinus
Qaleh Bozi	32.4	51.55	1.9	0.0117	0.95585	Iran	3	Equidae	Equinae	Equus	hemionus
Narmada	22.8206	77.8539	1.9	0.0117	0.95585	India	2.35	Equidae	Equinae	Equus	hemionus
Narmada	22.8206	77.8539	1.9	0.0117	0.95585	India	2.35	Equidae	Equinae	Equus	ferus
Champeix	46.3333	2.1667	1.9	0.0117	0.95585	France	2.25	Equidae	Equinae	Equus	ferus
Krak?w Spadzista Street (B)	50.0664	19.9875	1.9	0.0117	0.95585	Poland	2.5	Equidae	Equinae	Equus	ferus
Atapuerca TDW4 et TDE5	42.3333	-3.5	1.9	0.0117	0.95585	Spain	1.88	Equidae	Equinae	Equus	altidens
Treugolnaya Cave	43.8883	41.7281	1.9	0.0117	0.95585	Russia	2	Equidae	Equinae	Equus	altidens
Kamenka	51.3333	107.333	1.9	0.0117	0.95585	Russia	3	Equidae	Equinae	Equus	hemionus
Kamenka	51.3333	107.333	1.9	0.0117	0.95585	Russia	3	Equidae	Equinae	Equus	ferus
Botsy	51.8333	105.833	1.9	0.0117	0.95585	Russia	3	Equidae	Equinae	Equus	hemionus
Botsy	51.8333	105.833	1.9	0.0117	0.95585	Russia	3	Equidae	Equinae	Equus	ferus
Krishna	16.6556	80.1302	1.9	0.0117	0.95585	India	2.67	Equidae	Equinae	Equus	namadicus
Krishna	16.6556	80.1302	1.9	0.0117	0.95585	India	2.67	Equidae	Equinae	Equus	asinus
Latamne	35.5	36.3333	1.9	0.0117	0.95585	Syria	2.38	Equidae	Equinae	Equus	altidens
KurnoolCaves	15.8089	78.0542	1.9	0.0117	0.95585	India	1.83	Equidae	Equinae	Equus	asinus
Atapuerca TD6	42.3333	-3.5	1.9	0.0117	0.95585	Spain	1.78	Equidae	Equinae	Equus	altidens
Mahanadi	21.3181	83.9211	1.9	0.0117	0.95585	India	2.8	Equidae	Equinae	Equus	namadicus
Mahanadi	21.3181	83.9211	1.9	0.0117	0.95585	India	2.8	Equidae	Equinae	Equus	caballus
Calorie	39.6167	16.0167	1.9	0.0117	0.95585	Italy	2	Equidae	Equinae	Equus	antiquus
Ghod	19.0578	73.8358	1.9	0.0117	0.95585	India	2.63	Equidae	Equinae	Equus	asinus
Ghod	19.0578	73.8358	1.9	0.0117	0.95585	India	2.63	Equidae	Equinae	Equus	namadicus
Gujarat	22.2319	71.2442	1.9	0.0117	0.95585	India	3	Equidae	Equinae	Equus	asinus
Azykh Cave: Unit I-V	39.6192	46.9886	1.9	0.0117	0.95585	Azerbaijan	2.36	Equidae	Equinae	Equus	hydruntinus
Peninsular India	24	80	1.9	0.0117	0.95585	India	2.38	Equidae	Equinae	Equus	hemionus
Indo-Gangnetic	24	88	1.9	0.0117	0.95585	India	2.44	Equidae	Equinae	Equus	hemionus
Peninsular India	24	80	1.9	0.0117	0.95585	India	2.38	Equidae	Equinae	Equus	namadicus
Azykh Cave: Unit I-V	39.6192	46.9886	1.9	0.0117	0.95585	Azerbaijan	2.36	Equidae	Equinae	Equus	ferus
Indo-Gangnetic	24	88	1.9	0.0117	0.95585	India	2.44	Equidae	Equinae	Equus	namadicus
Vlakkraal	-34.15	19.3	1.9	0.0117	0.95585	South Africa	2.91	Equidae	Equinae	Equus	plicatus
Vlakkraal	-34.15	19.3	1.9	0.0117	0.95585	South Africa	2.91	Equidae	Equinae	Equus	helmei
Florisbad	-26.7667	26.05	1.9	0.0117	0.95585	South Africa	2.63	Equidae	Equinae	Equus	helmei
Florisbad	-26.7667	26.05	1.9	0.0117	0.95585	South Africa	2.63	Equidae	Equinae	Equus	burchellii
Florisbad	-26.7667	26.05	1.9	0.0117	0.95585	South Africa	2.63	Equidae	Equinae	Equus	quagga
Florisbad	-26.7667	26.05	1.9	0.0117	0.95585	South Africa	2.63	Equidae	Equinae	Equus	plicatus
Azykh Cave: Unit VI	39.6192	46.9886	1.9	0.0117	0.95585	Azerbaijan	2.14	Equidae	Equinae	Equus	suessenbornensis
Azykh Cave: Unit VI	39.6192	46.9886	1.9	0.0117	0.95585	Azerbaijan	2.14	Equidae	Equinae	Equus	hydruntinus
Vaal River	-26.8333	28.1	1.9	0.0117	0.95585	South Africa	2.81	Equidae		Eurygnathohippus	libycus
Vaal River	-26.8333	28.1	1.9	0.0117	0.95585	South Africa	2.81	Equidae	Equinae	Equus	plicatus
Chelmer	-20	30	1.9	0.0117	0.95585	Zimbabwe	2.92	Equidae	Equinae	Equus	plicatus
Chelmer	-20	30	1.9	0.0117	0.95585	Zimbabwe	2.92	Equidae	Equinae	Equus	helmei
Chelmer	-20	30	1.9	0.0117	0.95585	Zimbabwe	2.92	Equidae	Equinae	Equus	burchellii
Taoudenni	22.6667	-3.96667	1.9	0.0117	0.95585	Mali	3	Equidae	Equinae	Equus	burchellii
Vlakkraal	-34.15	19.3	1.9	0.0117	0.95585	South Africa	2.91	Equidae	Equinae	Equus	burchellii
Chelmer	-20	30	1.9	0.0117	0.95585	Zimbabwe	2.92	Equidae	Equinae	Equus	capensis
Qaleh Bozi	32.4	51.55	1.9	0.0117	0.95585	Iran	3	Equidae	Equinae	Equus	caballus
San Gimignano	43.4667	11.0333	1.9	0.0117	0.95585	Italy	2.75	Equidae	Equinae	Equus	ferus
Cornelia	-23.7833	29.1	1.9	0.0117	0.95585	South Africa	2.78	Equidae	Equinae	Equus	plicatus
Cornelia	-23.7833	29.1	1.9	0.0117	0.95585	South Africa	2.78	Equidae	Equinae	Equus	burchellii
Cornelia	-23.7833	29.1	1.9	0.0117	0.95585	South Africa	2.78	Equidae		Eurygnathohippus	libycus
Cornelia	-23.7833	29.1	1.9	0.0117	0.95585	South Africa	2.78	Equidae		Eurygnathohippus	cornelianus
Vaal River	-26.8333	28.1	1.9	0.0117	0.95585	South Africa	2.81	Equidae	Equinae	Equus	helmei
Vaal River	-26.8333	28.1	1.9	0.0117	0.95585	South Africa	2.81	Equidae	Equinae	Equus	burchellii
Mahanadi	21.3181	83.9211	1.9	0.0117	0.95585	India	2.8	Equidae	Equinae	Equus	asinus
Omo 5	6	37	1.9	0.0117	0.95585	Ethiopia	2.38	Equidae	Equinae	Hipparion	indet.
Humpata 9	-15.0792	13.2542	1.9	0.0117	0.95585	Angola	3	Equidae		indet.	indet.
Rawi 2	0.416944	35	1.9	0.0117	0.95585	Kenya	2.6	Equidae		indet.	indet.
Kesem-Kebena 4	9.5	40	1.9	0.0117	0.95585	Ethiopia	2.17	Equidae		indet.	indet.
Konso 2	6	40	1.9	0.0117	0.95585	Ethiopia	2.42	Equidae	Equinae	Hipparion	indet.
Denizli	37.8	29.1953	1.9	0.0117	0.95585	Turkey	2.33	Equidae	Equinae	Equus	suessenbornensis
Bucine	43.4775	11.6158	1.9	0.0117	0.95585	Italy	2.1	Equidae	Equinae	Equus	suessenbornensis
Mansourah	36.1667	6	1.9	0.0117	0.95585	Algeria	2.78	Equidae	Equinae	Equus	tabeti
Mansourah	36.1667	6	1.9	0.0117	0.95585	Algeria	2.78	Equidae		Eurygnathohippus	libycus
Humpata 4	-15.2903	13.4639	1.9	0.0117	0.95585	Angola	3	Equidae		indet.	indet.
Humpata 2	-15.2789	13.3028	1.9	0.0117	0.95585	Angola	2.6	Equidae		indet.	indet.
Fouarat	34.283	-6.65	1.9	0.0117	0.95585	Morocco	2.5	Equidae		Eurygnathohippus	libycus
Springbok site	-29.6833	17.85	1.9	0.0117	0.95585	South Africa	3	Equidae	Equinae	Hipparion	namaquense
Springbok site	-29.6833	17.85	1.9	0.0117	0.95585	South Africa	3	Equidae		Eurygnathohippus	libycus
Thorington (Westleton Beds)	52.3119	1.5494	1.9	0.0117	0.95585	United Kingdom	2	Equidae	Equinae	Equus	stenonis
Yukaris?gut?nu	39.827	30.429	1.9	0.0117	0.95585	Turkey	2.44	Equidae	Equinae	Equus	stenonis
Konso 2	6	40	1.9	0.0117	0.95585	Ethiopia	2.42	Equidae	Equinae	Equus	sp.
La Malouteyre (Le Puy)	47.35	6.2333	1.9	0.0117	0.95585	France	2.33	Equidae	Equinae	Equus	stenonis
Megalopolis	37.15	22.15	1.9	0.5	1.2	Greece	2.43	Equidae	Equinae	Equus	abeli
Volos	39.3	23	1.9	0.5	1.2	Greece	3	Equidae	Equinae	Equus	abeli
Venta Micena-2	37.7364	-2.40361	1.9	0.5	1.2	Spain	2.45	Equidae	Equinae	Equus	altidens
Apollonia (APL)	40.75	23.3	1.9	0.5	1.2	Greece	2.5	Equidae	Equinae	Equus	apolloniensis
Ravin Vulgarakis	40.3	23.3	1.9	0.5	1.2	Greece	2.5	Equidae	Equinae	Equus	stenonis
Pirro Nord	41.8019	15.3847	1.9	0.781	1.3405	Italy	2	Equidae	Equinae	Equus	altidens
Pirro Nord	41.8019	15.3847	1.9	0.781	1.3405	Italy	2	Equidae	Equinae	Equus	suessenbornensis
Dorn-D?rkheim 3	49.7684	8.26921	1.9	0.781	1.3405	Germany	2.11	Equidae	Equinae	Equus	suessenbornensis
Dorn-D?rkheim 3	49.7684	8.26921	1.9	0.781	1.3405	Germany	2.11	Equidae	Equinae	Equus	altidens
Pietrafitta	43	11.5	1.9	1.43333	1.66667	Italy	2	Equidae	Equinae	Equus	altidens
Karamajdan	38.5	69.2	1.9	1.43333	1.66667	Tajikistan	1.71	Equidae	Equinae	Equus	stenonis
Bura Hasuma	3.8	36.27	1.9	1.55	1.725	Kenya	2.32	Equidae	Equinae	Equus	koobiforensis
Bura Hasuma	3.8	36.27	1.9	1.55	1.725	Kenya	2.32	Equidae	Equinae	Eurygnathohippus	ethiopicum
Fonelas	37.25	-3.1	1.9	1.66667	1.78333	Spain	2.17	Equidae	Equinae	Equus	livenzovensis
Shungura H	4.9138	35.9683	1.9	1.74	1.82	Ethiopia	2.63	Equidae	Equinae	Equus	oldowayensis
Shungura H	4.9138	35.9683	1.9	1.74	1.82	Ethiopia	2.63	Equidae		Eurygnathohippus	woldegabrieli
Shungura H	4.9138	35.9683	1.9	1.74	1.82	Ethiopia	2.63	Equidae		Eurygnathohippus	cornelianus
Zasuchino 4	52	107	1.9	1.93792	1.91896	Russia	3	Equidae	Equinae	Equus	indet.
Barranco Leon-5	37.7236	-2.45222	1.88	1.02	1.45	Spain	2.33	Equidae	Equinae	Equus	altidens
Barranco Leon-5	37.7236	-2.45222	1.88	1.02	1.45	Spain	2.33	Equidae	Equinae	Equus	suessenbornensis
Kalochoro III	3.98345	35.7385	1.88	1.53	1.705	Kenya	2.6	Equidae	Equinae	Equus	indet.
Kokiselei 1	4.01705	35.7725	1.88	1.53	1.705	Kenya	2.69	Equidae		Eurygnathohippus	cornelianus
Kokiselei 1	4.01705	35.7725	1.88	1.53	1.705	Kenya	2.69	Equidae	Equinae	Eurygnathohippus	ethiopicum
Koobi Fora 1	4.05667	36.2581	1.88	1.6	1.74	Kenya	2.62	Equidae	Equinae	Equus	koobiforensis
Koobi Fora 1	4.05667	36.2581	1.88	1.6	1.74	Kenya	2.62	Equidae	Equinae	Eurygnathohippus	ethiopicum
Naiyena Engol 2 and 3	4.05091	35.7887	1.88	1.62	1.75	Kenya	2.76	Equidae	Equinae	Equus	indet.
Karari Ridge 3	4.18633	36.4152	1.88	1.78	1.83	Kenya	2.22	Equidae	Equinae	Equus	koobiforensis
Karari Ridge 3	4.18633	36.4152	1.88	1.78	1.83	Kenya	2.22	Equidae	Equinae	Hipparion	indet.
Ileret 2	4.29444	36.3134	1.87	1.53	1.7	Kenya	2.47	Equidae	Equinae	Equus	tabeti
Ileret 2	4.29444	36.3134	1.87	1.53	1.7	Kenya	2.47	Equidae	Equinae	Equus	koobiforensis
Ileret 2	4.29444	36.3134	1.87	1.53	1.7	Kenya	2.47	Equidae	Equinae	Eurygnathohippus	ethiopicum
Farneta	43.6667	12	1.8615	1.681	1.77125	Italy	2.33	Equidae	Equinae	Equus	stenonis
Farneta	43.6667	12	1.8615	1.681	1.77125	Italy	2.33	Equidae	Equinae	Equus	altidens
Koobi Fora Ridge 3	3.90671	36.2303	1.86	1.53	1.695	Kenya	2.41	Equidae	Equinae	Eurygnathohippus	ethiopicum
Koobi Fora Ridge 3	3.90671	36.2303	1.86	1.53	1.695	Kenya	2.41	Equidae	Equinae	Equus	koobiforensis
Dmanisi	41.3361	44.3439	1.85	1.778	1.814	Georgia	2	Equidae	Equinae	Equus	stenonis
Dmanisi	41.3361	44.3439	1.85	1.778	1.814	Georgia	2	Equidae	Equinae	Equus	altidens
Olduvai Bed I	-2.98667	35.3468	1.845	1.785	1.815	Tanzania	2.33	Equidae	Equinae	Equus	oldowayensis
Olduvai Bed I	-2.98667	35.3468	1.845	1.785	1.815	Tanzania	2.33	Equidae		Eurygnathohippus	libycus
Olduvai Bed I	-2.98667	35.3468	1.845	1.785	1.815	Tanzania	2.33	Equidae		Eurygnathohippus	cornelianus
El Kherba	36.667	5.66861	1.83367	1.778	1.80583	Algeria	2.71	Equidae	Equinae	Equus	tabeti
El Kherba	36.667	5.66861	1.83367	1.778	1.80583	Algeria	2.71	Equidae	Equinae	Equus	numidicus
Sainzelles	45	4	1.8114	1.3	1.5557	France	2	Equidae	Equinae	Equus	altidens
Huangjiawan	33.4822	108.868	1.80951	0.0117	0.910605	China	1.69	Equidae	Equinae	Equus	qingyangensis
Buia-Dandiero	14.833	39.833	1.80951	0.582433	1.19597	Eritrea	2.5	Equidae	Equinae	Equus	grevyi
Longgudong Cave 14	30.6542	110.075	1.80951	1.15317	1.48134	China	1.64	Equidae	Equinae	Equus	indet.
Longgudong Cave 13	30.6542	110.075	1.80951	1.15317	1.48134	China	1.78	Equidae	Equinae	Equus	indet.
Longgudong Cave 15	30.6542	110.075	1.80951	1.15317	1.48134	China	3	Equidae	Equinae	Equus	indet.
Zhoukoudian 9	39.6833	115.935	1.80951	1.15317	1.48134	China	2.57	Equidae	Equinae	Equus	sanmeniensis
Longyadong Cave	34.0861	110.136	1.80951	1.15317	1.48134	China	1.43	Equidae	Equinae	Equus	sanmeniensis
Gengjiagou	36.5756	107.298	1.80951	1.15317	1.48134	China	2.8	Equidae	Equinae	Equus	sanmeniensis
Zhoukoudian 13	39.6833	115.935	1.80951	1.15317	1.48134	China	2.1	Equidae	Equinae	Equus	sanmeniensis
Longgudong Cave 12	30.6542	110.075	1.80951	1.15317	1.48134	China	1.7	Equidae	Equinae	Equus	indet.
Longgudong Cave 11	30.6542	110.075	1.80951	1.15317	1.48134	China	1.64	Equidae	Equinae	Equus	indet.
Longgudong Cave 6	30.6542	110.075	1.80951	1.15317	1.48134	China	1.78	Equidae	Equinae	Equus	indet.
Longgudong Cave 4	30.6542	110.075	1.80951	1.15317	1.48134	China	1.88	Equidae	Equinae	Equus	indet.
Longgudong Cave 8	30.6542	110.075	1.80951	1.15317	1.48134	China	1.45	Equidae	Equinae	Equus	indet.
Longgudong Cave 7	30.6542	110.075	1.80951	1.15317	1.48134	China	1.64	Equidae	Equinae	Equus	indet.
Longgudong Cave 5	30.6542	110.075	1.80951	1.15317	1.48134	China	1.7	Equidae	Equinae	Equus	indet.
Huituipo	42	112	1.80951	1.15317	1.48134	China	2.25	Equidae	Equinae	Equus	indet.
Lingyi	34.9667	110.117	1.80951	1.15317	1.48134	China	2.56	Equidae	Equinae	Hipparion	indet.
Lingyi	34.9667	110.117	1.80951	1.15317	1.48134	China	2.56	Equidae	Equinae	Equus	sanmeniensis
Lingyi	34.9667	110.117	1.80951	1.15317	1.48134	China	2.56	Equidae	Equinae	Equus	huanghoensis
Longgudong Cave 10	30.6542	110.075	1.80951	1.15317	1.48134	China	1.7	Equidae	Equinae	Equus	indet.
Longgudong Cave 9	30.6542	110.075	1.80951	1.15317	1.48134	China	1.58	Equidae	Equinae	Equus	indet.
Bajiazui	35.8833	107.45	1.80951	1.15317	1.48134	China	2.14	Equidae	Equinae	Equus	qingyangensis
Liucheng	24.6533	109.232	1.80951	1.15317	1.48134	China	1.27	Equidae	Equinae	Equus	yunnanensis
Bajiazui	35.8833	107.45	1.80951	1.15317	1.48134	China	2.14	Equidae		Proboscidipparion	sinense
Chaotung	27.3167	103.717	1.80951	1.15317	1.48134	China	1.8	Equidae	Equinae	Equus	yunnanensis
Nixi	28	99.5	1.80951	1.15317	1.48134	China	2.5	Equidae	Equinae	Equus	yunnanensis
Southern Great Basin SB60IIIC	20.5667	-103.676	1.8	0.2	1	Mexico	3	Equidae	Equinae	Equus	conversidens
Ain Hanech	35.417	4.133	1.8	0.774	1.287	Algeria	2.42	Equidae		Eurygnathohippus	libycus
Ain Hanech	35.417	4.133	1.8	0.774	1.287	Algeria	2.42	Equidae	Equinae	Equus	tabeti
Swartkrans	-26.083	27.767	1.8	0.774	1.287	South Africa	3	Equidae	Equinae	Hipparion	indet.
Thomas Quarry 1(L)	33.5667	-7.55139	1.8	0.774	1.287	Morocco	3	Equidae	Equinae	Equus	mauritanicus
Konso	6	40	1.8	0.774	1.287	Ethiopia	2.44	Equidae	Equinae	Equus	indet.
Anabo Koma	11	43	1.8	0.774	1.287	Djibouti	2.64	Equidae		Eurygnathohippus	cornelianus
Anabo Koma	11	43	1.8	0.774	1.287	Djibouti	2.64	Equidae	Equinae	Equus	indet.
Konso	6	40	1.8	0.774	1.287	Ethiopia	2.44	Equidae	Equinae	Hipparion	indet.
Kromdraai	-28	26	1.8	0.774	1.287	South Africa	2.32	Equidae		Eurygnathohippus	libycus
Kromdraai	-28	26	1.8	0.774	1.287	South Africa	2.32	Equidae	Equinae	Equus	burchellii
Northern Great Basin NB36IIIB	39.1608	-119.754	1.8	0.9	1.35	USA	2.5	Equidae	Equinae	Equus	idahoensis
Southern Great Basin SB37E	35.6672	-105.964	1.8	0.9	1.35	USA	2.5	Equidae	Equinae	Equus	scotti
Southern Great Basin SB36C	35.6672	-105.964	1.8	0.9	1.35	USA	2.6	Equidae	Equinae	Equus	scotti
Northern Great Basin NB36IIIB	39.1608	-119.754	1.8	0.9	1.35	USA	2.5	Equidae	Equinae	Equus	giganteus
Southern Great Basin SB37F	35.6672	-105.964	1.8	0.9	1.35	USA	2.75	Equidae	Equinae	Equus	indet.
Gulf Coast GC15E	28.1333	-81.6317	1.8	0.9	1.35	USA	1.67	Equidae	Equinae	Equus	indet.
Southern Great Basin SB37E	35.6672	-105.964	1.8	0.9	1.35	USA	2.5	Equidae	Equinae	Equus	calobatus
Gulf Coast GC18IV	28.1333	-81.6317	1.8	0.9	1.35	USA	1.82	Equidae	Equinae	Equus	indet.
Gulf Coast GC18IIIC	28.1333	-81.6317	1.8	0.9	1.35	USA	2	Equidae	Equinae	Equus	indet.
Gulf Coast GC18IIIA	28.1333	-81.6317	1.8	0.9	1.35	USA	1.82	Equidae	Equinae	Equus	indet.
Gulf Coast GC18IV	28.1333	-81.6317	1.8	0.9	1.35	USA	1.82	Equidae	Equinae	Equus	sp.
Gulf Coast GC18IIIB	28.1333	-81.6317	1.8	0.9	1.35	USA	1.8	Equidae	Equinae	Equus	indet.
Gulf Coast GC18IIIA	28.1333	-81.6317	1.8	0.9	1.35	USA	1.82	Equidae	Equinae	Equus	sp.
Monte Riccio	42.2503	11.7697	1.8	1.5	1.65	Italy	1.88	Equidae	Equinae	Equus	stenonis
Nakoret	2.75225	36.3232	1.8	1.6	1.7	Kenya	2.37	Equidae	Equinae	Hipparion	indet.
Nakoret	2.75225	36.3232	1.8	1.6	1.7	Kenya	2.37	Equidae	Equinae	Equus	indet.
Olduvai Bed II	-2.99563	35.3525	1.785	1.15	1.4675	Tanzania	2.44	Equidae	Equinae	Equus	oldowayensis
Olduvai Bed II	-2.99563	35.3525	1.785	1.15	1.4675	Tanzania	2.44	Equidae		Eurygnathohippus	woldegabrieli
Olduvai Bed II	-2.99563	35.3525	1.785	1.15	1.4675	Tanzania	2.44	Equidae		Eurygnathohippus	cornelianus
Kocabas	37.8675	29.3381	1.778	1.044	1.411	Turkey	1.8	Equidae	Equinae	Equus	altidens
Kocabas	37.8675	29.3381	1.778	1.044	1.411	Turkey	1.8	Equidae	Equinae	Equus	sp.
Quibas	38.3099	-1.10928	1.778	1.072	1.425	Spain	2.2	Equidae	Equinae	Equus	altidens
Nihewan_Yangshuizhan I	40.2186	114.66	1.778	1.185	1.4815	China	2	Equidae	Equinae	Equus	huanghoensis
Nihewan_Xiaochangliang	40.2167	114.6	1.778	1.185	1.4815	China	2.71	Equidae	Equinae	Hipparion	indet.
Nihewan_Xiaochangliang	40.2167	114.6	1.778	1.185	1.4815	China	2.71	Equidae	Equinae	Equus	sanmeniensis
Nihewan_Xiaochangliang	40.2167	114.6	1.778	1.185	1.4815	China	2.71	Equidae		Proboscidipparion	sinense
Nihewan_Heitugou	40.2172	114.658	1.778	1.44567	1.61183	China	2.67	Equidae	Equinae	Equus	sanmeniensis
Shungura J	4.9138	35.9683	1.74	1.53	1.635	Ethiopia	3	Equidae	Equinae	Equus	oldowayensis
Nihewan_banshan	40.2256	114.664	1.7239	0.8678	1.29585	China	2.33	Equidae	Equinae	Equus	indet.
Incarcal I	41.9844	2.82111	1.7239	0.8678	1.29585	Spain	2	Equidae	Equinae	Equus	altidens
Nariokotome 1: 2 and 3	4.12967	35.8761	1.62	1.33	1.475	Kenya	2.71	Equidae	Equinae	Equus	indet.
Naiyena Engol 4	4.08019	35.7875	1.62	1.33	1.475	Kenya	3	Equidae	Equinae	Eurygnathohippus	ethiopicum
Naiyena Engol 4	4.08019	35.7875	1.62	1.33	1.475	Kenya	3	Equidae	Equinae	Equus	indet.
Kalochoro I	4.08071	35.7303	1.62	1.39	1.505	Kenya	2.83	Equidae	Equinae	Eurygnathohippus	ethiopicum
Kalochoro I	4.08071	35.7303	1.62	1.39	1.505	Kenya	2.83	Equidae	Equinae	Equus	indet.
Koobi Fora 2	4.09111	36.2694	1.6	1.39	1.495	Kenya	2.6	Equidae	Equinae	Equus	indet.
Loruth Kaado 3	4.60928	35.7591	1.53	1.33	1.43	Kenya	3	Equidae	Equinae	Equus	indet.
Koobi Fora Ridge 4	3.90672	36.2304	1.53	1.38	1.455	Kenya	2.52	Equidae	Equinae	Eurygnathohippus	ethiopicum
Koobi Fora Ridge 4	3.90672	36.2304	1.53	1.38	1.455	Kenya	2.52	Equidae	Equinae	Equus	tabeti
Ileret 3	4.26903	36.2776	1.53	1.38	1.455	Kenya	2.27	Equidae	Equinae	Eurygnathohippus	ethiopicum
Ileret 3	4.26903	36.2776	1.53	1.38	1.455	Kenya	2.27	Equidae	Equinae	Equus	grevyi
Ileret 3	4.26903	36.2776	1.53	1.38	1.455	Kenya	2.27	Equidae	Equinae	Equus	burchellii
Koobi Fora Ridge 4	3.90672	36.2304	1.53	1.38	1.455	Kenya	2.52	Equidae	Equinae	Equus	koobiforensis
Koobi Fora Ridge 4	3.90672	36.2304	1.53	1.38	1.455	Kenya	2.52	Equidae	Equinae	Equus	grevyi
Shungura K	4.9138	35.9683	1.53	1.39	1.46	Ethiopia	3	Equidae		Eurygnathohippus	woldegabrieli
Karari Ridge 4	4.18617	36.912	1.53	1.39	1.46	Kenya	2.33	Equidae	Equinae	Equus	tabeti
Karari Ridge 4	4.18617	36.912	1.53	1.39	1.46	Kenya	2.33	Equidae	Equinae	Equus	grevyi
Nihewan_Madigou	40.2186	114.666	1.4815	1.185	1.33325	China	3	Equidae	Equinae	Equus	indet.
Shungura L	4.9138	35.9683	1.39	0.7	1.045	Ethiopia	2.46	Equidae	Equinae	Equus	grevyi
Ileret 4	4.30134	36.2453	1.39	0.75	1.07	Kenya	3	Equidae	Equinae	Equus	grevyi
Nihewan_Feiliang	40.2236	114.67	1.38267	1.185	1.28383	China	2.5	Equidae		Proboscidipparion	indet.
Nihewan_Feiliang	40.2236	114.67	1.38267	1.185	1.28383	China	2.5	Equidae	Equinae	Equus	sanmeniensis
Nachukui 1: 2 and 3	4.09618	35.8432	1.33	0.74	1.035	Kenya	2.55	Equidae	Equinae	Equus	indet.
Vallonnet	43.8	7.3	1.31	0.98	1.145	France	2.17	Equidae	Equinae	Equus	stenonis
Gongwangling	34.2	109.467	1.29585	0.582433	0.939142	China	1.5	Equidae	Equinae	Equus	sanmeniensis
Laochihe	34.355	109.518	1.29585	0.582433	0.939142	China	1.6	Equidae	Equinae	Equus	sanmeniensis
Dongyuanqiao	23.5922	102.042	1.29585	0.582433	0.939142	China	2	Equidae	Equinae	Equus	indet.
Zhoukoudian 21	39.6833	115.935	1.29585	0.582433	0.939142	China	3	Equidae	Equinae	Equus	beijingensis
Guanyindong	27.0381	106.026	1.29585	0.582433	0.939142	China	1.44	Equidae	Equinae	Equus	indet.
Baiyundong Cave	34.2833	117.3	1.29585	0.582433	0.939142	China	2.25	Equidae	Equinae	Equus	sanmeniensis
Zasukhino 3	52	107	1.29585	0.8678	1.08183	Russia	2.57	Equidae	Equinae	Equus	hemionus
Zasukhino 3	52	107	1.29585	0.8678	1.08183	Russia	2.57	Equidae	Equinae	Equus	sanmeniensis
Nihewan_Donggutuo	40.2228	114.67	1.2795	0.781	1.03025	China	3	Equidae	Equinae	Equus	sanmeniensis
Nihewan_Majuangou_III	40.2256	114.664	1.173	1.13933	1.15617	China	2	Equidae	Equinae	Hipparion	indet.
Olduvai Bed III	-2.98667	35.3468	1.15	0.95	1.05	Tanzania	2.72	Equidae	Equinae	Eurygnathohippus	ethiopicum
Olduvai Bed III	-2.98667	35.3468	1.15	0.95	1.05	Tanzania	2.72	Equidae	Equinae	Equus	oldowayensis
Tarija	-21.51	-64.7	1.1	0.1	0.6	Bolivia	2	Equidae	Equinae	Equus	insulatus
Tarija	-21.51	-64.7	1.1	0.1	0.6	Bolivia	2	Equidae	Equinae	Onohippidium	devillei
Tarija	-21.51	-64.7	1.1	0.1	0.6	Bolivia	2	Equidae	Equinae	Hippidion	principale
Kanjera 1	0.383333	35	1.072	0.781	0.9265	Kenya	2.68	Equidae	Equinae	Hipparion	indet.
Kanjera 1	0.383333	35	1.072	0.781	0.9265	Kenya	2.68	Equidae	Equinae	Equus	indet.
Cueva Victoria	37.6	0.9	1.072	0.781	0.9265	Spain	2.45	Equidae	Equinae	Equus	suessenbornensis
Cueva Victoria	37.6	0.9	1.072	0.781	0.9265	Spain	2.45	Equidae	Equinae	Equus	altidens
Untermassfeld	51.1667	11.1667	1.072	0.988	1.03	Germany	1.64	Equidae	Equinae	Equus	wuesti
Daka	10.2818	40.5342	1.042	0.781	0.9115	Ethiopia	2.61	Equidae		Eurygnathohippus	cornelianus
Daka	10.2818	40.5342	1.042	0.781	0.9115	Ethiopia	2.61	Equidae	Equinae	Equus	oldowayensis
Slivia	45.6667	13.6667	1.03	0.781	0.9055	Italy	2	Equidae	Equinae	Equus	altidens
Slivia	45.6667	13.6667	1.03	0.781	0.9055	Italy	2	Equidae	Equinae	Equus	suessenbornensis
Durfort	43.9889	3.95147	1	0.5	0.75	France	2.2	Equidae		indet.	indet.
Akhalkalaki	41.5433	43.4608	1	0.7	0.85	Georgia	2.67	Equidae	Equinae	Equus	altidens
Akhalkalaki	41.5433	43.4608	1	0.7	0.85	Georgia	2.67	Equidae	Equinae	Equus	suessenbornensis
Olduvai Bed IV	-2.98667	35.3468	0.95	0.78	0.865	Tanzania	2.39	Equidae	Equinae	Equus	oldowayensis
Olduvai Bed IV	-2.98667	35.3468	0.95	0.78	0.865	Tanzania	2.39	Equidae	Equinae	Eurygnathohippus	ethiopicum
Gulf Coast GC15F	28.1333	-81.6317	0.9	0.39	0.645	USA	1.75	Equidae	Equinae	Equus	indet.
Cava Redicicoli	41.98	12.53	0.9	0.8	0.85	Italy	2.29	Equidae	Equinae	Equus	altidens
Prezletice	50.15	14.5833	0.79	0.761	0.7755	Czech Republic	2.29	Equidae	Equinae	Equus	hemionus
Prezletice	50.15	14.5833	0.79	0.761	0.7755	Czech Republic	2.29	Equidae	Equinae	Equus	ferus
Tologoi 2.5	52	105	0.781	0	0.3905	Russia	3	Equidae	Equinae	Equus	sanmeniensis
Nihewan_Maliang	40.2225	114.678	0.781	0	0.3905	China	3	Equidae	Equinae	Equus	indet.
Str?nsk? Sk?la I	49.2	16.6	0.781	0.0117	0.39635	Czech Republic	2	Equidae	Equinae	Equus	suessenbornensis
Atapuerca TD8	42.333	-3.5	0.781	0.35	0.5655	Spain	1.7	Equidae	Equinae	Equus	altidens
Mosbach 2	50.07	8.27	0.781	0.424	0.6025	Germany	2.07	Equidae	Equinae	Equus	ferus
Cesi	43	12.9167	0.781	0.427	0.604	Italy	2.13	Equidae	Equinae	Equus	indet.
West Runton	52.93	1.23	0.781	0.435	0.608	United Kingdom	1.92	Equidae	Equinae	Equus	altidens
West Runton	52.93	1.23	0.781	0.435	0.608	United Kingdom	1.92	Equidae	Equinae	Equus	suessenbornensis
Boxgrove	50.8575	-0.7122	0.781	0.478	0.6295	United Kingdom	1.73	Equidae	Equinae	Equus	ferus
Voigtstedt	51.4	11.32	0.781	0.676	0.7285	Germany	1.9	Equidae	Equinae	Equus	suessenbornensis
C?llar de Baza-1	37.5844	-2.5783	0.781	0.676	0.7285	Spain	2.2	Equidae	Equinae	Equus	suessenbornensis
C?llar de Baza-1	37.5844	-2.5783	0.781	0.676	0.7285	Spain	2.2	Equidae	Equinae	Equus	altidens
Masek Beds	-2.98667	35.3468	0.78	0.5	0.64	Tanzania	3	Equidae	Equinae	Eurygnathohippus	ethiopicum
Masek Beds	-2.98667	35.3468	0.78	0.5	0.64	Tanzania	3	Equidae	Equinae	Equus	oldowayensis
Ain Maarouf	31	-8	0.774	0.129	0.4515	Morocco	2.75	Equidae	Equinae	Equus	algericus
Tighenif	31.0833	-8	0.774	0.129	0.4515	Morocco	2.5	Equidae	Equinae	Equus	mauritanicus
Oulad Hamida 1 (GDR)	33.5667	-7.55083	0.774	0.129	0.4515	Morocco	2.89	Equidae	Equinae	Equus	mauritanicus
Ain Maarouf	31	-8	0.774	0.129	0.4515	Morocco	2.75	Equidae	Equinae	Equus	mauritanicus
V?rtessz?l?s 2	47.62	18.38	0.774	0.337	0.5555	Hungary	2	Equidae	Equinae	Equus	ferus
Hundsheim	48.14	16.93	0.774	0.424	0.599	Austria	2.13	Equidae	Equinae	Equus	ferus
S?ssenborn	50.98	11.35	0.774	0.424	0.599	Germany	2.07	Equidae	Equinae	Equus	suessenbornensis
Pakefield	52.4553	1.7319	0.774	0.424	0.599	United Kingdom	1.94	Equidae	Equinae	Equus	altidens
S?ssenborn	50.98	11.35	0.774	0.424	0.599	Germany	2.07	Equidae	Equinae	Equus	altidens
Pakefield	52.4553	1.7319	0.774	0.424	0.599	United Kingdom	1.94	Equidae	Equinae	Equus	suessenbornensis
Ponte Galeria	42.3333	12.5	0.771	0.649	0.71	Italy	2.3	Equidae	Equinae	Equus	altidens
Koneprusy C718	49.93	14.08	0.761	0.621	0.691	Czech Republic	2.3	Equidae	Equinae	Equus	mosbachensis
Caune de lArago: CM III	42.8	2.75	0.69	0.35	0.52	France	2.2	Equidae	Equinae	Equus	ferus
Caune de lArago: CM II	42.8	2.75	0.69	0.35	0.52	France	2.2	Equidae	Equinae	Equus	ferus
Caune de lArago: CM I	42.8	2.75	0.69	0.35	0.52	France	2.11	Equidae	Equinae	Equus	ferus
Mauer	49.3333	8.5	0.662	0.397	0.5295	Germany	1.75	Equidae	Equinae	Equus	ferus
Dubasu	44.7292	123.696	0.653775	0.0117	0.332738	China	2.67	Equidae	Equinae	Equus	przewalskii
Dubasu	44.7292	123.696	0.653775	0.0117	0.332738	China	2.67	Equidae	Equinae	Equus	hemionus
Xialatuo	31.4	100.633	0.653775	0.0117	0.332738	China	2.6	Equidae	Equinae	Equus	hemionus
Zhoukoudian_Upper Cave_sapiens	39.6833	115.935	0.653775	0.0117	0.332738	China	2.14	Equidae	Equinae	Equus	hemionus
Qinglonggou	27.4333	101.517	0.653775	0.0117	0.332738	China	2.25	Equidae	Equinae	Equus	yunnanensis
Liujiang Cave	24.1831	109.432	0.653775	0.0117	0.332738	China	1.74	Equidae	Equinae	Equus	indet.
Zhoukoudian 3	39.6833	115.935	0.653775	0.0117	0.332738	China	2	Equidae	Equinae	Equus	indet.
Tangke	32.9167	101.7	0.653775	0.0117	0.332738	China	3	Equidae	Equinae	Equus	indet.
Marganets	47.2	34.3	0.621	0.424	0.5225	Ukraine	3	Equidae	Equinae	Equus	indet.
Tikhonovka 1	46.85	35.3	0.621	0.424	0.5225	Ukraine	2.75	Equidae	Equinae	Equus	ferus
Osteria Moricone	42.1034	12.6853	0.6	0.125	0.3625	Italy	2.29	Equidae	Equinae	Equus	ferus
Osteria Moricone	42.1034	12.6853	0.6	0.125	0.3625	Italy	2.29	Equidae	Equinae	Equus	hydruntinus
Visogliano	45.7667	13.65	0.581	0.323	0.452	Italy	1.7	Equidae	Equinae	Equus	ferus
Vergranne	47.409	6.39145	0.563	0.424	0.4935	France	1.7	Equidae	Equinae	Equus	hydruntinus
Vergranne	47.409	6.39145	0.563	0.424	0.4935	France	1.7	Equidae	Equinae	Equus	ferus
Nihewan_Hougou	40.2242	114.672	0.520667	0.3905	0.455583	China	2.5	Equidae	Equinae	Equus	indet.
Castel di Guido	41.54	12.2833	0.465	0.395	0.43	Italy	1.8	Equidae	Equinae	Equus	ferus
Fontana Ranuccio	42.1667	14	0.458	0.366	0.412	Italy	1.9	Equidae	Equinae	Equus	ferus
Bolshaja Kamyshevakha 1	48.9	36.7	0.424	0.3	0.362	Ukraine	2	Equidae	Equinae	Equus	stenonis
Steinheim am Murr	48.6864	10.0622	0.424	0.374	0.399	Germany	2.4	Equidae	Equinae	Equus	ferus
Steinheim am Murr	48.6864	10.0622	0.424	0.374	0.399	Germany	2.4	Equidae	Equinae	Equus	hydruntinus
Swanscombe	51.4458	0.3103	0.424	0.374	0.399	United Kingdom	1.91	Equidae	Equinae	Equus	ferus
Arenero de Casa de Eulogio	40.3188	-3.56075	0.379	0.275	0.327	Spain	3	Equidae	Equinae	Equus	ferus
Arenero los Pinos	40.3255	-3.65321	0.379	0.275	0.327	Spain	3	Equidae	Equinae	Equus	hydruntinus
Arenero Manuel Soto	40.3502	-3.67742	0.379	0.275	0.327	Spain	2.33	Equidae	Equinae	Equus	ferus
Orcasitas	40.3679	-3.69746	0.379	0.275	0.327	Spain	2.4	Equidae	Equinae	Equus	ferus
Arenero de Nicomedes	40.3496	-3.6743	0.379	0.275	0.327	Spain	3	Equidae	Equinae	Equus	ferus
Arenero Oxigeno	40.3345	-3.664	0.379	0.275	0.327	Spain	3	Equidae	Equinae	Equus	ferus
Transfesa	40.3551	-3.68069	0.379	0.275	0.327	Spain	3	Equidae	Equinae	Equus	indet.
Arenero los Pinos	40.3255	-3.65321	0.379	0.275	0.327	Spain	3	Equidae	Equinae	Equus	ferus
Lunel-Viel	43.6797	4.09139	0.3786	0.297067	0.337833	France	2.13	Equidae	Equinae	Equus	ferus
Lunel-Viel	43.6797	4.09139	0.3786	0.297067	0.337833	France	2.13	Equidae	Equinae	Equus	hydruntinus
Atapuerca TN6da	42.3333	-3.5	0.374	0.13	0.252	Spain	2	Equidae	Equinae	Equus	ferus
Atapuerca TN6	42.3333	-3.5	0.374	0.13	0.252	Spain	2.67	Equidae	Equinae	Equus	ferus
Atapuerca TG10D	42.333	-3.5	0.374	0.13	0.252	Spain	2.33	Equidae	Equinae	Equus	ferus
Atapuerca TG10cc	42.333	-3.5	0.374	0.13	0.252	Spain	2	Equidae	Equinae	Equus	ferus
Atapuerca TG10A	42.333	-3.5	0.374	0.13	0.252	Spain	2.2	Equidae	Equinae	Equus	ferus
Atapuerca TZ	42.3333	-3.5	0.374	0.13	0.252	Spain	2.25	Equidae	Equinae	Equus	ferus
Atapuerca TN7	42.3333	-3.5	0.374	0.13	0.252	Spain	2	Equidae	Equinae	Equus	ferus
Atapuerca TG8	42.3333	-3.5	0.374	0.13	0.252	Spain	3	Equidae	Equinae	Equus	ferus
Atapuerca TG11	42.3333	-3.5	0.374	0.13	0.252	Spain	2.14	Equidae	Equinae	Equus	ferus
Atapuerca TN5	42.3333	-3.5	0.374	0.13	0.252	Spain	2.67	Equidae	Equinae	Equus	ferus
Atapuerca TG9	42.3333	-3.5	0.374	0.13	0.252	Spain	3	Equidae	Equinae	Equus	ferus
Atapuerca TG10C	42.333	-3.5	0.374	0.13	0.252	Spain	2.25	Equidae	Equinae	Equus	ferus
Atapuerca TG10B	42.333	-3.5	0.374	0.13	0.252	Spain	2.2	Equidae	Equinae	Equus	ferus
Atapuerca TD11	42.333	-3.5	0.374	0.243	0.3085	Spain	2.5	Equidae	Equinae	Equus	ferus
Atapuerca TD10	42.333	-3.5	0.374	0.243	0.3085	Spain	2	Equidae	Equinae	Equus	ferus
Sch?ningen	52.1	11	0.337	0.3	0.3185	Germany	2.33	Equidae	Equinae	Equus	hydruntinus
Sch?ningen	52.1	11	0.337	0.3	0.3185	Germany	2.33	Equidae	Equinae	Equus	ferus
Nihewan_Motianling	40.1831	114.692	0.328	0.302	0.315	China	2.33	Equidae	Equinae	Equus	przewalskii
La Polledrara di Cecanibbio	41.9346	12.3055	0.325	0.304	0.3145	Italy	2.1	Equidae	Equinae	Equus	ferus
Casal de Pazzi	41.55	12.33	0.3	0.243	0.2715	Italy	2.13	Equidae	Equinae	Equus	sp.
Bisnik cave	50.42	19.8	0.3	0.243	0.2715	Poland	2	Equidae	Equinae	Equus	ferus
Reilingen	49.2944	8.5733	0.3	0.243	0.2715	Germany	2.31	Equidae	Equinae	Equus	indet.
La Fage	45.2531	2.20022	0.3	0.243	0.2715	France	2.08	Equidae	Equinae	Equus	achenheimensis
Nihewan_queergou	40.1656	114.479	0.281	0.255	0.268	China	2	Equidae	Equinae	Equus	indet.
Preresa	40.3045	-3.58798	0.235	0.206	0.2205	Spain	2	Equidae	Equinae	Equus	ferus
SDSNH Locality 3775	33.2318	-117.362	0.2	0	0.1	USA	1.67	Equidae	Equinae	Equus	indet.
Xujiayao	40.1	113.983	0.2	0.16	0.18	China	2.22	Equidae	Equinae	Equus	hemionus
Xujiayao	40.1	113.983	0.2	0.16	0.18	China	2.22	Equidae	Equinae	Equus	przewalskii
Cova de l?Arbreda	42.1609	2.74643	0.15	0.03	0.09	Spain	2.3	Equidae	Equinae	Equus	hydruntinus
Cova de l?Arbreda	42.1609	2.74643	0.15	0.03	0.09	Spain	2.3	Equidae	Equinae	Equus	ferus
Nihewan_Hutouliang	40.1667	114.5	0.14	0.01	0.075	China	2.44	Equidae	Equinae	Equus	hemionus
Nihewan_Hutouliang	40.1667	114.5	0.14	0.01	0.075	China	2.44	Equidae	Equinae	Equus	przewalskii
cave of hearths	-23.55	29.2	0.129	0.0117	0.07035	South Africa	2.45	Equidae	Equinae	Equus	helmei
cave of hearths	-23.55	29.2	0.129	0.0117	0.07035	South Africa	2.45	Equidae	Equinae	Equus	burchellii
Montemerano	42.37	11.29	0.125	0.08	0.1025	Italy	2.13	Equidae	Equinae	Equus	ferus
Laetoli_14	-3.5	35	0.12	0.12	0.12	Tanzania	2.75	Equidae	Hipparionini	indet.	indet.
Overmere III	51.0428	3.96972	0.115	0.01	0.0625	Belgium	2.4	Equidae	Equinae	Equus	indet.
Praha Upper Pleistocene	50.0878	14.4205	0.115	0.01	0.0625	Czech Republic	2.67	Equidae	Equinae	Equus	przewalskii
Praha Upper Pleistocene	50.0878	14.4205	0.115	0.01	0.0625	Czech Republic	2.67	Equidae	Equinae	Equus	hydruntinus
Overmere II	51.0428	3.96972	0.115	0.01	0.0625	Belgium	2.14	Equidae	Equinae	Equus	indet.
Perick	51.2547	8.16881	0.115	0.01	0.0625	Germany	2.4	Equidae	Equinae	Equus	ferus
Valdavara 3	42.8518	-7.16014	0.112837	0.103414	0.108125	Spain	2	Equidae	Equinae	Equus	ferus
Nihewan_Banjinzi	40.2589	114.705	0.094	0.084	0.089	China	2.5	Equidae	Equinae	Equus	przewalskii
Nihewan_Xinmiaozhuang	40.0203	114.429	0.075	0.063	0.069	China	2.75	Equidae	Equinae	Equus	przewalskii
Abric Romani	41.5308	1.67961	0.07	0.04	0.055	Spain	2.25	Equidae	Equinae	Equus	ferus
Pech de l'Az?	45.1469	0.75722	0.057	0.029	0.043	France	1.88	Equidae	Equinae	Equus	hydruntinus
Pech de l'Az?	45.1469	0.75722	0.057	0.029	0.043	France	1.88	Equidae	Equinae	Equus	ferus
Nihewan_Xibaimaying	40.1244	114.239	0.049	0.043	0.046	China	2.43	Equidae	Equinae	Equus	przewalskii
Nihewan_Xibaimaying	40.1244	114.239	0.049	0.043	0.046	China	2.43	Equidae	Equinae	Equus	hemionus
Baume N?ron	44	4	0.0441	0.0419	0.043	France	2.44	Equidae	Equinae	Equus	indet.
Labeko Koba	43.2	-2.11667	0.035	0.029	0.032	Spain	2.11	Equidae	Equinae	Equus	indet.
Aba Zawei	33.25	102.417	0.0295	0.0235	0.0265	China	3	Equidae	Equinae	Equus	indet.
Mene de Inciarte	10.7953	-72.2392	0.02798	0.0255	0.02674	Venezuela	3	Equidae	Equinae	Equus	santaeelenae
Nihewan_Jijitan	40.1	114.433	0.014	0.0138	0.0139	China	3	Equidae	Equinae	Equus	przewalskii
