# Supplementary material for: Evolution of the Family Equidae, Subfamily Equinae, in North, Central and South America, Eurasia and Africa during the Plio-Pleistocene
Source: Biology (Basel). 2022 Aug 24;11(9):1258. doi: 10.3390/biology11091258 (PMC9495906; doi:10.3390/biology11091258)
Supplement: Supplementary file 1 [file biology-11-01258-s001.zip › Supplementary Table S6_North and Central American Equus sensu lato.xlsx]

## Sheet: Table S6A
Table S6A. Summary of taxonomic conclusions of 68 studies discussing fossil specimens of North and Central American Equus sensu lato.
Genus/Subgenus	Species	Author(s)	Gidley, 1901	Matthew, 1924	Schultz, 1936	Stock and Bode, 1937	Savage, 1951	Hibbard, 1955	Quinn, 1957	Mooser, 1958	Alvarez, 1965	Dalquest and Hughes, 1965	Strain, 1966	Lundelius and Stevens, 1970	Lundelius, 1972a	Lundelius, 1972b	Skinner, 1972	Harington and Clulow, 1973	Mooser and Dalquest, 1975	Dalquest, 1977	Dalquest, 1978	Dalquest, 1979	Benett, 1980	Harington, 1980	Harris and Porter, 1980	Kurtén and Anderson, 1980	Lundelius, 1984	Harris, 1985	Winans, 1985	Alvarez and Ocaña, 1987	Porter, 1988	Winans, 1989	Harington, 1990	Jackson and Harington, 1991	Dalquest and Schultz,1992	Eisenmann, 1992	Azzaroli and Voorhies, 1993	Downs and Miller, 1994	Reynoso-Rosales and Montellano-Ballesteros, 1994	Azzaroli, 1995	Harington and Cinq-Mars, 1995	Hulbert, 1995	Forsten and Eisenmann, 1995	Burke and Cinq-Mars, 1996	Azzaroli, 1998	Eisenmann and Baylac, 2000	Pichardo, 2000	Baskin and Mosqueda, 2002	Guthrie, 2003
Amerhippus	Amerhippus sp. Medicine Hat, Alberta	Harington, 1990																															Amerhippus sp.
Amerhippus	Amerhippus sp. Natural Trap Cave (Large)	Eisenmann et al., 2008																											Equus alaskae			Equus alaskae																	ferus
Amerhippus	Amerhippus sp. Natural Trap Cave (Small)	Eisenmann et al., 2008																											Equus alaskae			Equus alaskae
Equus	achates	Hay and Cook, 1930					nomen vanum		Onager littoralis			Equus conversidens								Equus (Hemionus) tau		Equus (Hemionus) tau				Equus (Hemionus) tau			nomen dubium											Equus francisci?		Equus (Hemionus) achates? / Equus (Hemionus) francisci?			Equus francisci?		Equus (Onager) francisci?
Asinus	aguascalentensis	Mooser, 1958								Asinus aguascalentensis	Equus aguascalentensis								Equus excelsus							Equus (Amerhippus) excelsus			nomen nudum	Equus excelsus															Equus excelsus
Equus	alaskae	Winans, 1989																											Equus alaskae			Equus alaskae
Onager	altidens (name preoccupied; substituted with pseudoaltidens by Hulbert, 1995)	Quinn, 1957							Onager altidens	Onager altidens	Equus altidens								Equus excelsus		Asinus (Hemionus) altidens					Equus (Hemionus) hemionus			Equus francisci	Equus excelsus		Equus francisci			Equus altidens Quinn (not Equus altidens Reichenou)					Equus semiplicatus		Equus (Hemionus) pseudaltidens			Equus semiplicatus			Equus pseudaltidens
Equus	americanus (name preoccupied; Leidy, 1858, substituted with the name Equus complicatus)	Leidy, 1847	name preoccupied																										name preoccupied
Onager	arellanoi	Mooser, 1958								Onager arellanoi	Equus arellanoi								Equus excelsus							Equus (Amerhippus) excelsus			nomen nudum / Equus francisci?	Equus excelsus		Equus francisci													Equus excelsus
Equus	barcenaei	Cope, 1884	Equus tau					Equus conversidens			Equus barcenaei	Equus conversidens										Equus conversidens							nomen dubium	Equus conversidens															Equus conversidens		Equus (Onager) francisci / nomen vanum
Equus	bautistensis	Frick, 1921					Equus bautistensis																			Equus occidentalis			Equus mexicanus / Equus scotti																nomen dubium
Equus	caballus	Linnaeus, 1758							Equus caballus caballus	Equus caballus caballus	Equus caballus laurentius				Equus scotti				Equus cf. caballus				Equus (Equus) caballus		Equus niobrarensis			Equus niobrarensis												Equus caballus							Equus (Hesperohippus) pacificus
Equus (Asinus)	calobatus	Troxell, 1915					nomen vanum		Onager semiplicatus		Equus calobatus						Equus (Hemionus) calobatus		Equus (Hemionus) calobatus	Equus (Hemionus) calobatus	Asinus (Hemionus) calobatus		Equus (Asinus) calobatus			Equus (Hemionus) calobatus			Equus francisci	Equus calobatus		Equus francisci			Equus calobatus	Equus calobatus		Equus (Hemionus) calobatus	Equus conversidens	Equus semiplicatus		Equus (Hemionus) calobatus			Equus semiplicatus
Equus	Equus cf. caballus	Savage, 1951					Equus cf. caballus		Onager lambei / Equus caballus laurentius																													Equus cf. caballus
Equus	Equus cf. caballus	Mooser and Dalquest, 1975																	Equus cf. caballus		Asinus excelsus									Equus excelsus									Equus conversidens
Equus	Equus cf. calobatus	Eisenmann et al., 2008
Equus	Equus cf. conversidens	Eisenmann et al., 2008																																														Equus cf. conversidens
Equus	Equus cf. conversidens	Downs, 1958									Equus conversidens conversidens
Equus	Equus cfr. tau	Owen and Freudenberg, 1910						Equus conversidens
Equus	cedralensis	Alberdi et al. 2014
Equus	complicatus	Leidy, 1858	Equus complicatus				nomen vanum / Equus scotti?		Onager (Hesperohippus) complicatus							Equus complicatus										Equus complicatus			nomen dubium						Equus excelsus					Equus excelsus?					Equus excelsus? / nomen dubium		Equus (Amerhippus) fraternus / nomen vanum
Equus	conversidens	Owen, 1869	Equus conversidens					Equus conversidens	Asinus conversidens	Asinus conversidens	Equus conversidens conversidens	Equus conversidens		Equus conversidens	Equus conversidens		Equus (Hemionus) conversidens	Equus (Asinus) conversidens	Equus conversidens		Asinus (Amerhippus) conversidens	Equus conversidens	Equus (Asinus) conversidens		Equus conversidens	Equus (Amerhippus) conversidens		Equus conversidens	nomen dubium / Equus alaskae	Equus conversidens		Equus alaskae	Equus conversidens		Equus conversidens			Equus (Hemionus) conversidens	Equus conversidens	Equus conversidens		Equus conversidens			Equus conversidens		Equus (Amerhippus) conversidens
Equus	conversidens leoni	Stock, 1950 and 1953									Equus conversidens leoni											nomen nudum / Equus conversidens							nomen nudum / Equus alaskae	Equus conversidens		Equus alaskae
Equus	crenidens	Cope, 1884	nomen dubium					Equus (Plesippus) crenidens			Equus crenidens															Equus crenidens			nomen dubium	Equus crenidens															Equus crenidens?		Equus (Hesperohippus) pacificus?
Equus	cumminsii	Cope, 1893	Protohippus cumminsii		Plesippus cumminsii								Equus (Asinus) cuminsii / Equus (Asinus) cf. E. (A.) cuminsii								Asinus (Asinus) cumminsii					Equus (Asinus) cumminsii			nomen dubium						Equus cumminsii		Equus cumminsii?			Equus cumminsii?
Equus (Dolichohippus)	enormis	Downs and Miller, 1994																																				Equus (Dolichohippus) enormis		Equus enormis
Equus	eous	Hay, 1899A	Equus complicatus				nomen dubium																						nomen dubium
Equus (Equus)	Equus (Equus) species A	Downs and Miller, 1994																																				Equus (Equus) species A
Equus (Equus)	Equus (Equus) species B	Downs and Miller, 1994																																				Equus (Equus) species B
Equus cf. Equus (Equus)	Equus cf. Equus (Equus) sp.	Downs and Miller, 1994																																				Equus cf. Equus (Equus) sp.
Equus	excelsus	Leidy, 1858	nomen dubium			Equus .cf excelsus	nomen vanum	Equus (Hesperohippus) mexicanus			Equus excelsus / Equus mexicanus				Equus scotti				Equus excelsus						Equus niobrarensis	Equus (Amerhippus) excelsus			nomen dubium	Equus excelsus / Equus pacificus					Equus excelsus				Equus conversidens	Equus excelsus		nomen dubium			Equus excelsus		Equus excelsus
Equus	ferus	Boddaert, 1785																																											Equus ferus
Pliohippus	francescana	Frick, 1921			Plesippus francescana		Equus simplicidens																			Equus (Dolichohippus) simplicidens			may belong to Dinohippus or Astrohippus								Equus (Dolichohippus) simplicidens?
Pliohippus	francescana minor	Frick, 1921																											may belong to Dinohippus or Astrohippus
Equus	francisci	Hay, 1915					Equus tau					Equus conversidens		Equus francisci								Equus (Hemionus) tau	Equus (Asinus) francisci	Equus (Asinus) francisci		Equus (Hemionus) tau	Equus francisci		Equus francisci	Equus francisci		Equus francisci			Equus francisci / Equus tau? (the authors state that E. francisci appears to be a distinct species, slightly larger than E. tau, but it is possible that E. francisci is a synonym of E. tau)			Equus (Hemionus) francisci		Equus francisci		Equus (Hemionus) francisci / Equus (Hemionus) tau (most likely synonymous if Equus tau is accepted as a valid name)				Equus (Equus) francisci	Equus (Onager) francisci	Equus francisci
Equus	fraternus	Leidy, 1858, 1860	Equus fraternus				nomen vanum		Onager fraternus							Equus fraternus					Asinus (Tomolabis) fraternus					Equus fraternus			nomen dubium	Equus fraternus										Equus fraternus		Equus "fraternus" (species poorly founded and probably invalid)			Equus fraternus		Equus (Amerhippus) fraternus
Equus	fraternus fraternus	Cope, 1899	Equus complicatus																										nomen dubium
Equus	fraternus pectinatus	Cope, 1899	Equus pectinatus																										nomen dubium
Equus	giganteus	Gidley, 1901	Equus giganteus				Equus giganteus				Equus giganteus									Equus giganteus						Equus giganteus			nomen dubium						Equus giganteus / Equus scotti? (the authors state that E. giganteus may simply be unusually large males of E. scotti)			Equus giganteus							Equus enormis?
Equus	hatcheri	Hay, 1915					Equus scotti																Equus (Equus) hatcheri			Equus (Amerhippus) niobrarensis			Equus scotti	Equus giganteus		Equus scotti								Equus niobrarensis		Equus niobrarensis			Equus niobrarensis
Equus (Asinus)	hemionus	Pallas, 1775																								Equus (Hemionus) hemionus										Equus hydruntinus													hemionoid
Onager (Hesperohippus)	hibbardi	Mooser, 1958								Onager (Hesperohippus) hibbardi	Equus hibbardi								Equus excelsus							Equus (Amerhippus) excelsus			nomen nudum	Equus excelsus															Equus excelsus
Equus	holmesi	Hay, 1920					nomen vanum																						nomen dubium
Equus	idahoensis	Merriam, 1918			Plesippus idahoensis		Equus simplicidens						Equus (Plesippus) idahoensis													Equus (Dolichohippus) simplicidens			nomen dubium								Equus (Dolichohippus?) idahoensis	Equus idahoensis		idahoensis
Equus	intermedius (name preoccupied; renamed as Equus eous by Hay 1899)	Cope, 1895	name preoccupied																										name preoccupied																		Equus excelsus
Equus	jubatus	Hay, 1927					nomen vanum																						nomen dubium
Equus (Asinus)	kiang																	Equus (Asinus) cf. kiang						Equus (Asinus) cf. kiang							Equus (Asinus) cf. kiang
Equus	lambei	Hay, 1917					Equus cf. caballus		Onager lambei									Equus (Asinus) lambei						Equus (Asinus) lambei		Equus (Amerhippus) lambei			Equus caballus / Equus asinus		Equus (Asinus) lambei	Equus alaskae		Equus lambei						Equus lambei / Equus niobrarensis lambei?	Equus lambei			Equus lambei	Equus lambei / Equus niobrarensis lambei?				lambei
Equus	laurentius	Hay, 1913					Equus caballus		Equus caballus laurentius	Equus caballus laurentius	Equus caballus laurentius				Equus niobrarensis						Equus (Equus) caballus				Equus niobrarensis				Equus caballus	Equus excelsus		Equus laurentius								Equus caballus					Equus ferus
Equus	leidyi	Hay, 1913					nomen vanum				Equus leidyi					Equus fraternus													nomen dubium	Equus fraternus					Equus excelsus							Equus "leidyi" (questionable validity of species name)			Equus fraternus		Equus (Amerhippus) fraternus
Equus	littoralis	Hay, 1913					nomen vanum	Equus conversidens	littoralis	Onager littoralis	Equus littoralis	Equus conversidens										Equus (Hemionus) tau				Equus (Hemionus) tau			nomen dubium	Equus conversidens										Equus francisci?		nomen dubium / small specimens within the Equus sp. A population match the type of E. littoralis in size and morphology			Equus francisci?		Equus (Amerhippus) littoralis
Equus	major	De Kay, 1842, 1848	nomen nudum																										nomen nudum																Equus excelsus?
Equus (Dolichohippus)	mesamexicanus	Mooser, 1973																											nomen dubium
Equus (Hesperohippus)	mexicanus	Hibbard, 1955						Equus (Hesperohippus) mexicanus			Equus mexicanus					Equus pacificus			Equus (Hesperohippus) mexicanus				Equus (Asinus) mexicanus			Equus pacificus			Equus mexicanus	Equus pacificus		Equus laurentius			Equus mexicanus			Equus mexicanus (tentatively rejected Hesperohippus as a valid subgenus)	Equus conversidens	Equus pacificus					Equus mexicanus		Equus (Hesperohippus) pacificus
Equus	midlandensis	Quinn, 1957							Equus midlandensis						Equus scotti										Equus niobrarensis	Equus (Amerhippus) scotti			Equus mexicanus			Equus laurentius															Equus (Hesperohippus) pacificus
Equus	nearcticus	Blake, 1863																											nomen nudum
Equus	nevadanus	Hay, 1927					nomen vanum																						nomen nudum / Equus alaskae													nomen dubium					Equus (Amerhippus) conversidens
Equus	niobrarensis	Hay, 1913					Equus scotti								Equus niobrarensis										Equus niobrarensis	Equus (Amerhippus) niobrarensis		Equus niobrarensis	Equus scotti			Equus scotti								Equus niobrarensis		Equus niobrarensis					Equus (Hesperohippus) pacificus		ferus?
Equus	niobrarensis alaskae	Hay, 1913					Equus cf. caballus		Equus caballus laurentius														Equus (Equus) caballus alaskae						Equus alaskae			Equus alaskae								Equus caballus					Equus ferus
Equus	nobisi	Pichardo, 2004
Equus	occidentalis	Leidy, 1865	Equus occidentalis				Equus occidentalis	Equus (Hesperohippus) mexicanus			Equus mexicanus										Asinus occidentalis		Equus (Equus) occidentalis		Equus occidentalis referred	Equus occidentalis		Equus occidentalis	nomen dubium / Equus mexicanus	Equus pacificus		Equus laurentius			Equus occidentalis			Equus (Amerhippus) "occidentalis"		Equus occidentalis		Equus occidentalis			Equus occidentalis	Equus (Equus) occidentalis	Equus (Allozebra) occidentalis
Equus (Hesperohippus)	oviedoi	Mooser, 1958								Equus (Hesperohippus) oviedoi	Equus oviedoi								Equus (Hesperohippus) mexicanus										nomen nudum	Equus pacificus
Equus	pacificus	Leidy, 1868	Equus pacificus				nomen vanum		Equus pacificus							Equus pacificus				Equus giganteus						Equus pacificus		Equus pacificus	nomen dubium	Equus pacificus										Equus pacificus					Equus mexicanus?		Equus (Hesperohippus) pacificus
Equus	parastylidens	Mooser, 1958								Equus parastylidens	Equus parastylidens								Equus (Parastilidequus) parastylidens		Equus (Parastilidequus) parastylidens					Equus (Parastylidequus) parastylidens			nomen nudum / Equus scotti	Equus parastylidens								E. parastylidens? (inidcated that there is insufficient basis for a reliable sugneric diagnosis of Parastilidequus [called Parastylidens in their paper])	Equus conversidens						Equus parastylidens?
Equus	pectinatus	Gidley, 1901	Equus pectinatus				Equus pectinatus				Equus pectinatus															Equus pectinatus			nomen dubium											Equus pacificus?					Equus excelsus?
Equus	pons	Quinn, 1958																											nomen dubium			Equus simplicidens
Pliohippus	proversus	Merriam, 1916		Plesippus proversus	Plesippus proversus		Equus simplicidens										Equus (Dolichohippus) simplicidens									Equus (Dolichohippus) simplicidens			belongs in Pliohippus								Equus (Dolichohippus) simplicidens
?Equus	quinni	Slaughter, 1962												Equus francisci								Equus (Hemionus) tau				Equus (Hemionus) tau			Equus francisci			Equus francisci			Equus tau					Equus francisci					Equus francisci		Equus (Onager) francisci
Equus	scotti	Gidley, 1900	Equus scotti				Equus scotti								Equus scotti					Equus scotti	Asinus (Amerhippus) scotti		Equus (Asinus) scotti		Equus niobrarensis / scotti referred	Equus (Amerhippus) scotti	Equus cf. scotti	Equus occidentalis	Equus scotti			Equus scotti	Equus scotti		Equus scotti	Equus scotti		Equus (Asinus) scotti		Equus excelsus		Equus scotti	Equus scotti		Equus excelsus		Equus excelsus	Equus cf. scotti	scotti
Equus	semiplicatus	Cope, 1893	Equus semiplicatus				nomen vanum		Onager semiplicatus		Equus semiplicatus									Equus (Hemionus) calobatus						Equus (Amerhippus) conversidens			nomen dubium						indeterminate					Equus semiplicatus		nomen dubium			Equus semiplicatus
Equus (Plesippus)	shoshonensis	Gidley, 1930			Plesippus shoshonensis		Equus simplicidens										Equus (Dolichohippus) simplicidens						Equus (Equus) shoshonensis			Equus (Dolichohippus) simplicidens			Equus shoshonensis			Equus simplicidens					Equus (Dolichohippus) simplicidens	Equus (Dolichohippus) simplicidens					Equus (Plesippus) simplicidens			Equus (Plesippus) shoshonensis
Equus	simplicidens	Cope, 1892	Pliohippus simplicidens	Plesippus simplicidens	Plesippus simplicidens		Equus simplicidens						Equus (Plesippus) simplicidens				Equus (Dolichohippus) simplicidens				Equus (Dolichohippus) simplicidens					Equus (Dolichohippus) simplicidens			nomen dubium	simplicidens		Equus simplicidens			Equus simplicidens	Equus simplicidens	Equus (Dolichohippus) simplicidens	Equus (Dolichohippus) simplicidens		Equus simplicidens			Equus (Plesippus) simplicidens
Equus (Dolichohippus)	stenonis anguinus	Azzaroli and Voorhies, 1993																																			Equus (Dolichohippus) stenonis anguinus			stenonis anguinus
Equus	species A	Harris and Porter, 1980																							Equus species A			Equus species A
Equus	Equus sp. A Leisey Shell Pit A, Inglis 1A, Rigby Shell Pit, Punta Gorda, Pool Branch, Haile 21A, Coleman 2A	Hulbert, 1995																																								Equus sp. A / Equus "leidyi"
Equus (Hemionus)	Equus (Hemionus) sp. B Leisey Shell Pit A, Apollo Beach, Pool Branch, Flamingo Waterway	Hulbert, 1995																																								Equus (Hemionus) sp. B
Equus	Equus sp. C Leisey Shell Pit A, Haile 16A	Hulbert, 1995																																								Equus sp. C / Equus "fraternus"
Equus	Equus sp. Santo Domingo Basin	Azzaroli and Voorhies, 1993																																			Equus sp. Santo Domingo
Equus (Dolichohippus?)	Equus (Dolichohippus?) sp. Long Pine Formation	Azzaroli and Voorhies, 1993																																			Equus (Dolichohippus?) sp. Long Pine Formation
Equus	Equus sp. Dry Mountains	Azzaroli and Voorhies, 1993																																			Equus sp. Dry Mountains
Equus	Equus sp. Baton Flates	Azzaroli and Voorhies, 1993																																			Equus sp. Baton Flates
Equus	Equus sp. Eleven Mile Wash	Azzaroli and Voorhies, 1993																																			Equus sp. Eleven Mile Wash
Equus	Equus sp.	Meade, 1953																		Equus scotti
Equus	Equus sp.	Mooser and Dalquest, 1975
Equus	Equus sp. Conkling and Shelter, New Mexico	Eisenmann et al., 2008
Equus	Equus sp. indt.	Hay and Cook, 1930																		Equus scotti
Equus	Equus sp. Gilliland	Dalquest and Schultz, 1992																																	Equus sp.
Equus (Hemionus)	Equus (Hemionus) sp. (small)	Scott, 2004
Equus	Equus sp. (large)	Scott, 2004
Equus	Equus sp. (small)	Scott, 2004
Equus (Asinus)	Equus (Asinus) sp. cf. E. (A.) cumminsii	Scott, 2004
Equus	tau	Owen, 1869	Equus tau				Equus tau	Equus conversidens			Equus tau	Equus conversidens							Equus (Hemionus) tau	Equus (Hemionus) tau	Asinus (Hemionus) tau	Equus (Hemionus) tau				Equus (Hemionus) tau	Equus francisci	Equus tau	nomen dubium	Equus tau					Equus tau				Equus conversidens	Equus francisci?		nomen dubium			Equus francisci?		Equus (Onager) francisci / nomen vanum
Equus	verae	Sher, 1971																															Equus verae																ferus
Onager	zoyatalis	Mooser, 1958								Onager zoyatalis	Equus zoyatalis			Equus francisci					Equus conversidens			Equus conversidens							nomen nudum / Equus francisci	Equus francisci		Equus francisci													Equus conversidens?
Names that are currently considered to fall outside of Equus sensu lato
Equus (Hippotigris)	clarendonensis	Quinn, 1955																											Pliohippus supremus
Equus	eurystylus	Cope, 1893	Hipparion eurystylus																										Neohipparion eurystylus
Equus	laparensis	Quinn, 1955																											Astrohippus
Equus	minutus (name preoccupied; renamed Equus phlegon by Hay, 1899)	Cope, 1893	name preoccupied																										name preoccupied
Equus (Hippotigris)	ocontesis	Mooser, 1958									Equus ocontesis										Dinohippus ocotensis								probably Astrohippus
Equus (Hippotigris)	parastylus	Quinn, 1955																											Pliohippus supremus
Equus (Protohippus)	parvulus	Marsh, 1868																											belongs in Nannippus
Equus (Protohippus)	perditus	Leidy, 1858																											belongs in Protohippus
Equus	phlegon	Hay, 1899	Protohippus phlegon																							Nannippus phlegon			Nannippus peninsulatus
Hippoterium	princeps	Leidy, 1890					nomen vanum																						belongs in Nannippus
Equus (Hippotigris)	sellardsi	Quinn, 1955																											belongs in Astrohippus
References
Alberdi, M. T, Arroyo-Cabrales, J., Marín-Leyva, A. H., and Polaco, O. J. (2014). Study of Cedral horses and their place in the Mexican Quaternary. Rev Mex de Cienc Geol 31:221–237.
Alvárez, T. (1965). Catálogo paleomastozoológico mexicano. Mexico, D.F.: Mexico, Instituto Nacional de Antropología e Historia. p. 44–52.
Alvárez, T., and Ocaña, A. (1987). Nomenclatura específica de los équidos del Pleistoceno de México. Anales de la Escuela Nacional de Ciencias Biológicas, Mexico D.F. 31, 125–132.
Azzaroli, A. (1995). A synopsis of the Quaternary species of Equus in North America. Boll Soc Paleontol Ital. 34:205–221.
Azzaroli, A. (1998). The genus Equus in North America – The Pleistocene species. Paleontographia Italica 85:1–60.
Azzaroli, A., and Voorhies, M. (1993). The genus Equus in North America: The Blancan species. Palaeontographia Italica. 80, 175–198.
Barrón-Ortiz, C. R. (2016). The late Pleistocene extinction in North America: an investigation of horse and bison fossil material and its implication for nutritional extinction models. Ph.D. Dissertation, University of Calgary.
Barrón-Ortiz, C. I., Rodrigues, A. T., Theodor, J. M., Kooyman, B. P., Yang, D. Y., and Speller, C. F. (2017). Cheek tooth morphology and ancient mitochondrial DNA of late Pleistocene horses from the western interior of North America: implications for the taxonomy of North American Late Pleistocene Equus. PLoS ONE 12(8): e0183045. https://doi.org/10.1371/journal.pone.0183045
Barrón-Ortiz, C. I., Avilla, L. S., Jass, C. N., Bravo-Cuevas, V. M., Machado, H., and Mothé, D. (2019). What is Equus? Reconciling taxonomy and phylogenetic analyses. Frontiers in Ecology and Evolution. 7, Article 343. https://doi.org/10.3389/fevo.2019.00343.
Baskin, J. A., and Mosqueda, A. E. (2002). Analysis of horse (Equus) metapodials from the Late Pleistocene of the Lower Nueces Valley, South Texas. Texas J. Sci. 54, 17–26.
Bennett, D. K. (1980). Stripes do not a zebra make. Part I: A cladistic analysis of Equus. Syst. Zool. 29, 272–287.
Brown, K. E., Akersten, W. A., and Scott, E. (2015). Equus occidentalis Leidy from “Asphalto,” Kern County, California. Science Series. Natural History Museum of Los Angeles County 42, 81–89.
Burke, A., and Cinq-Mars, J. (1996). Dental characteristics of late Pleistocene Equus lambei from the Bluefish Caves, Yukon Territory, and their comparison with Eurasian horses. Geogr Phys Quatern 50, 81–93.
Cirilli, O., Pandolfi, L., Rook, L., and Bernor, R. L. (2021). Evolution of Old World Equus and Origin of the Zebra-Ass Clade. Sci. Rep. 11, 1–11, doi:10.1038/s41598-021-89440-9.
Cisneros, J. C. (2005). New Pleistocene vertebrate fauna from El Salvador. Revista Brasileira de Paleontologia 8, 239–255.
Dalquest, W. W. (1977). Mammals of the Hollomann Local Fauna, Pleistocene of Oklahoma. The Southwestern Naturalist 22, 255–268.
Dalquest, W. W. (1978). Phylogeny of American horses of Blancan and Pleistocene age. Acta Zool. Fennica. 15, 191–199.
Dalquest, W. W. (1979). The little horses (genus Equus) of the Pleistocene of North America. American Midland Naturalist. 101, 241–244.
Dalquest, W. W. and Hughes, J. T. (1965). The Pleistocene horse, Equus conversidens. American Midland Naturalist. 74, 408–417.
Dalquest, W. W., and Schultz, G. E. (1992). Ice Age Mammals of Northwestern Texas. Wichita Falls, TX: Midwestern State University Press.
Downs, T., and Miller, G. J. (1994). Late Cenozoic equids from the Anza-Borrego Desert of California. Nat. Hist. Mus. Los Angeles Co., Contrib. Sci. 440: 1–90.
Eisenmann, V. (1992). Origins, dispersals, and migrations of Equus (Mammlia, Perissodactyla). Courier Forsch.-Inst. Senckenberg 153, 161–170.
Eisenmann, V. (2006). Discriminating Equus skulls: the Franck’s index and the new palatal index. In: Mashkour M, (Ed.), Equids in Time and Space: Papers in Honour of Véra Eisenmann. Oxford: Oxbow Books. pp. 172–182.
Eisenmann, V. (2010). Sussemionus, a new subgenus of Equus (Perissodactyla, Mammalia). Comptes Rendus Biologies 333:235–240. https://doi.org/10.1016/j.crvi.2009.12.013
Eisenmann, V., and Baylac, M. (2000). Extant and fossil Equus (Mammalia, Perissodactyla) skulls: a morphometric definition of the subgenus Equus. Zoologica Scripta. 29, 89–100.
Eisenmann, V., Howe, J., Pichardo, M. (2008). Old World hemiones and New World slender species (Mammalia, Equidae). Palaeovertebrata 36:159–233. https://doi.org/10.18563/pv.36.1-4.159-233
Forsten, A., and Eisenmann, V. (1995). Equus (Plesippus) simplicidens (Cope), not Dolichohippus. Mammalia 59, 85–89.
Gidley, J. W. (1901). Tooth characters and revision of the North American species of the genus Equus. Bull Am Mus Nat 14, 91–142.
Guthrie, R. D. (2003). Rapid body size decline in Alaskan Pleistocene horses before extinction. Nature 426:169–171. https://doi.org/10.1038/nature02098
Harington, C. R. (1980). Pleistocene mammals from Lost Chicken Creek, Alaska. Can J Earth Sci 17, 168–198. https://doi.org/10.1139/e80-015
Harington, C. R. (1990). Vertebrates of the Last Interglaciation in Canada: A review, with new data. Géogr Phys Quatern 44(3), 375–387. https://doi.org/10.7202/032837ar
Harington, C. R. (2011). Pleistocene vertebrates of the Yukon Territory. Quat Sci Rev 30, 2341–2354. https://doi.org/10.1016/j.quascirev.2011.05.020
Harington, C. R., and Clulow, F. V. (1973). Pleistocene mammals from Gold Run Creek, Yukon Territory. Can J Earth Sci 10, 697–759. https://doi.org/10.1139/e73-069
Harington, C. R., and Cinq-Mars J (1995) Radiocarbon dates on Saiga antelope (Saiga tatarica) fossils from Yukon and the Northwest Territories. Arctic 48(1):1–7. https://doi.org/10.14430/arctic1218
Harris, A. (1985). Late Pleistocene Vertebrate Paleoecology of the West. Austin, TX: University of Texas Press.
Harris, A. H., and Porter, L. S. W. (1980). Late Pleistocene horses of Dry Cave, Eddy County, New Mexico. J Mammal. 1980; 61, 46–65.
Heintzman, P. D., Zazula, G. D., MacPhee, R. D. E., Scott, E., Cahill, J. A., McHorse, B. K., Kapp, J. D., Stiller, M., Wooller, M. J., Orlando, L., Southon, J., Froese, D. G., Shapiro, B. (2017). A new genus of horse from Pleistocene North America. eLife 6:e29944. https://doi.org/10.7554/eLife.29944
Hibbard, C. W. (1955). Pleistocene vertebrates from the Upper Becerra Formation, Valley of Tequixquiac, Mexico, with notes on other Pleistocene forms. Contrib Mus Paleont, Univ Michigan. 12, 47–96.
Hulbert, R. C., Jr. (1995). Equus from Leisey Shell Pit 1A and other Irvingtonian localities from Florida. Bull. Florida Mus. Nat. Hist. 37 Pt. II (17), 553–602.
Jackson, L. E., and Harington, C. R. (1991). Middle Wisconsinan mammals, stratigraphy, and sedimentology at the Ketza River, Yukon Territory. Géographie physique et Quaternaire 45, 69–77.
Jiménez-Hidalgo E, and Díaz-Sibaja, R. (2020) Was Equus cedralensis a non-stilt legged horse? Taxonomical implications for the Mexican Pleistocene horses. Ameghiniana 57(3), 284–288. https://doi.org/10.5710/AMGH.06.01.2020.3262
Kurtén, B., and Anderson, E. (1980). Pleistocene Mammals of North America. New York City, USA: Columbia University Press.
Lucas, S. G. (2014). Late Pleistocene mammals from El Hatillo, Panama. Revista Geológica de América Central 50, 139-151.
Lundelius, E. L., Jr. (1972a). Vertebrate remains from the Gray Sand. In: Hester, J. J. (Ed.), Blackwater Locality No. 1: A Stratified Early Man Site in Eastern New Mexico. Rancho de Taos, New Mexico: Fort Burgwin Research Center, Southern Methodist University. pp. 148–163.
Lundelius, E. L., Jr. (1972b). Fossil vertebrates from the late Pleistocene Ingleside fauna, San Patricio County, Texas. Bureau of Economic Geology, The University of Texas at Austin, Report of Investigations No. 77, 1–74.
Lundelius, E. L., Jr. (1984). A late Pleistocene mammalian fauna from Cueva Quebrada, Val Verde Country, Texas. Special Publication of the Carnegie Museum of Natural History 8, 456–481.
Lundelius, E. L., and Stevens, M. S. (1970). Equus francisci Hay, a small stilt-legged horse, Middle Pleistocene of Texas. Journal of Paleontology. 44, 148–153.
Matthew, W. D. (1924). A new link in the ancestry of the horse. Amer. Mus. Novitates. 131, 1–2.
Mooser, O. (1958). La Fauna "Cedazo" del Pleistoceno en Aguascalientes. Anales del Instituto de Biología, Universidad Nacional Autónoma de México 29, 409–452.
Mooser, O., and Dalquest, W. W. (1975). Pleistocene mammals from Aguascalientes, central Mexico. J Mammal. 56, 781–820.
Morgan, G.S., and Rinehart, L. F. (2007). Late Pleistocene (Rancholabrean) mammals from fissure deposits in the Jurassic Todilto Formation, White Mesa Mine, Sandoval County, North-Central New Mexico. New Mex. Geol. 29, 39–51.
Pichardo, M. (2000). Valsequillo biostratigraphy III: Equid ecospecies in paleoindian sites. Anthrop. Anz. 58, 275–298.
Pichardo, M. (2004). Review of horses in paleoindian sites of the Americas. Anthrop. Anz. 62, 11–35.
Porter, L. (1988). Late Pleistocene fauna of Lost Chicken Creek, Alaska. Arctic 41, 303–313.
Priego-Vargas, J., Bravo-Cuevas, V. M., and Jiménez-Hidalgo, E. (2017). Revisión taxonómica de los équidos del Pleistoceno de México con base en la morfología dental. Rev Bras Paleontol 20, 239–268. https://doi.org10.4072/rbp.2017.2.07
Quinn, J. H. (1957). Pleistocene Equidae of Texas. Bureau of Economic Geology, University of Texas. 33, 5–51.
Reynoso-Rosales, V. H., and Montellano-Ballesteros, M. (1994). Revisión de los équidos de la Fauna Cedazo del Pleistoceno de Aguascalientes, México. Revista Mexicana de Ciencias Geológicas 11, 87–105.
Savage, D. E. (1951). Late Cenozoic vertebrates, San Francisco Bay Region. Bull Dep Geo Scien. 28, 215–314.
Schultz, J. R. (1936). Plesippus francescana (Frick) from the late Pliocene, Coso Mountains, California, with a review of the genus Plesippus. Contributions to Palaeontology. Publications of the Carnegie Institution of Washington 1 (473), 1–13.
Scott, E. (2004). Chapter 20. Pliocene and Pleistocene horses from Porcupine Cave. In: Barnosky, A. (Ed.), Biodiversity Response to Climate Change in the Middle Pleistocene: The Porcupine Cave Fauna from Colorado. University of California Press, Berkeley. pp. 264–279.
Scott, E., Stafford, T. W. Jr, Graham, R .W., and Martin, L. D. (2010). Morphology and metrics, isotopes and dates: determining the validity of Equus laurentius Hay, 1913. J Vertebr Paleontol. 30, 1840–1847. doi:10.1080/02724634.2010.520780.
Skinner, M. F. (1972). Order Perissodactyla. In: Skinner, M. F., and Hibbard, C. W. (Eds.) Early Pleistocene Pre-Glacial and Glacial Rocks and Faunas of North-Central Nebraska. Bull. Amer. Mus. Nat. Hist. 148, 1–148.
Stock, C., and Bode, F. D. (1937). The occurrence of flints and extinct animals in pluvial deposits near Clovis, New Mexico. Part III – Geology and vertebrate paleontology of the late Quaternary near Clovis, New Mexico. Proc Acad Nat Sci Philadelphia. 88, 219–241.
Strain, W. S. (1966). Blancan mammalian fauna and Pleistocene formations, Hudspeth County, Texas. Bulletin of the Texas Memorial Museum 10, 1–55.
Valerio Z., A. L., and Laurito M., C. A. (2004). Paleofauna de Aguacaliente de Cartago, Costa Rica. Parte I: Equus cf. E. conversidens Owen, 1869. Revista Geológica de América Central 31, 87–92.
Weinstock, J., Willerslev, E., Sher, A., Tong, W., Ho, S. Y. W., Rubenstein, D., Storer, J., Burns, J., Martin, J., Bravi, C., Prieto, A., Froese, D., Scott, E., Xulong, L., Cooper, A. (2005). Evolution, systematics, and phylogeography of Pleistocene horses in the new world: a molecular perspective. PLoS Biol 3(8), 1373–1379. https://doi.org/10.1371/journal.pbio.0030241
Winans, M. C. (1985). Revision of North American fossil species of the genus Equus (Mammalia: Perissodactyla: Equidae). Ph.D. Dissertation, University of Texas at Austin.
Winans, M. C. (1989). A quantitative study of the North American fossil species of the genus Equus. In: Prothero, D. R., and Schoch, R. M. (Eds.), The evolution of Perissodactyls. New York: Clarendon Press. pp. 262–297.
[truncated: 21 more columns]

## Sheet: Table S6B
Table S6B. Identification of potentially valid species names. To identify potentially valid species names we evaluated the number of times that a particular name was considered valid relative to the number of times that the name was considered a nomen dubium/nomen nudum and the number of times the name was synonymized/reidentified with another name.
Valid - (nomen dubium/nudum + synonymized/reidentified)	Species
29	conversidens
18	simplicidens
15	occidentalis
13	francisci
10	lambei
9	scotti
8	ferus/caballus
7	fraternus
6	calobatus
6	cumminsii
6	giganteus
4	mexicanus
3	idahoensis
3	pacificus
3	parastylidens
3	pectinatus
2	enormis
2	stenonis anguinus
2	verae
2	crenidens
1	cedralensis
1	pseudoaltidens
1	nobisi
0	niobrarensis
0	excelsus
-1	tau
-1	mesamexicanus
-1	nearcticus
-1	oviedoi
-1	semiplicatus
-1	francescana
-1	francescana minor
-2	holmesi
-2	jubatus
-2	major
-2	pons
-2	proversus
-3	complicatus
-3	bautistensis
-3	eous
-4	shoshonensis
-4	aguascalentensis
-4	hibbardi
-5	nevadanus
-5	alaskae
-5	midlandensis
-5	arellanoi
-6	littoralis
-6	leidyi
-7	zoyatalis
-8	hatcheri
-8	achates
-9	barcenaei
-9	conversidens leoni
-12	quinni
NA	altidens (name preoccupied; substituted with pseudoaltidens by Hulbert, 1995)
NA	americanus (name preoccupied; substituted with complicatus by Leidy, 1858)
NA	intermedius (name preoccupied; substituted with eous by Hay, 1899)
NA	asinus (not recognized in the Americas prior to historic times; e.g., Taylor et al., 2022)
NA	hemionus (not recognized in the Americas; e.g., Eisenmann et al., 2008; Heintzman et al., 2017)
NA	hydruntinus (not recognized in the Americas; e.g., Eisenmann et al., 2008)
NA	kiang (not recognized in the Americas; e.g., Eisenmann et al., 2008; Heintzman et al., 2017)
NA	laurentius (historic domestic horse; Scott et al., 2010)
NA	clarendonensis (belongs in Pliohippus; Winans 1985)
NA	eurystylus (belongs in Neohipparion; Winans 1985)
NA	laparensis (belongs in Astrohippus; Winans 1985)
NA	minutus (name preoccupied; substituted with phlegon by Hay, 1899)
NA	ocontesis (probably belongs in Astrohippus; Winans 1985)
NA	parastylus (belongs in Pliohippus Winans 1985)
NA	parvulus (belongs in Nannippus; Winans 1985)
NA	perditus (belongs in Protohippus; Winans 1985)
NA	phlegon (belongs in Nannippus; Winans 1985)
NA	princeps (belongs in Nannippus; Winans 1985)
NA	sellardsi (belongs in Astrohippus; Winans 1985)
